# Supplementary material for: Facile synthesis of 1-aminoindoles via Rh(iii)-catalysed intramolecular three-component annulation
Source: Royal Society of Chemistry journal article supplement (doi:10.1039/c7qo00541e), 2017-01-01

## Supporting information

### Facile Synthesis of 1-Aminoindoles *via* Rh(III)-catalyzed Three-Component Annulation

Zi Yang, Xing Lin, Lianhui Wang and Xiuling Cui

Engineering Research Center of Molecular Medicine of Ministry of Education, Key Laboratory of Fujian Molecular Medicine, Key Laboratory of Xiamen Marine and Gene Drugs, School of Biomedical Sciences, Huaqiao University, Xiamen 361021, P. R. China

E-mail: cuixl@hqu.edu.cn

### Table of Contents

|                                                          |     |
|----------------------------------------------------------|-----|
| 1. General information.....                              | S2  |
| 2. Typical procedure for synthesis of <b>4</b> .....     | S2  |
| 3. Characterization data of compounds <b>4</b> .....     | S2  |
| 4. X-ray Crystallographic data of <b>4I</b> .....        | S13 |
| 5. Reference.....                                        | S17 |
| 6. NMR Spectra of compounds <b>4</b> and <b>5a</b> ..... | S18 |

## 1. General Information

All chemicals were analytically pure and used directly after purchased. All solvents were used without any particular precautions to extrude moisture. Melting points were determined in open glass capillaries and were uncorrected.  $^1\text{H}$  NMR spectra were recorded on 400 MHz spectrometers, and  $^{13}\text{C}$  NMR spectra were recorded on a 100 MHz spectrometer. Chemical shifts (in ppm) were referenced to tetramethylsilane ( $\delta = 0$  ppm) in  $\text{CDCl}_3$  as an internal standard at room temperature.  $^{13}\text{C}$  NMR spectra were obtained by using the same NMR spectrometers and were calibrated with  $\text{CDCl}_3$  ( $\delta = 77.00$  ppm). High-resolution mass spectra (HRMS) were equipped with an ESI source and a TOF detector. Column chromatography was performed on silica gel (70-230 mesh ASTM) using the reported eluents. Thin-layer chromatography (TLC) was carried out on  $4 \times 15$  cm plates with a layer thickness of 0.2 mm (silica gel 60 F254). Diazo compounds<sup>[1]</sup> and phenylhydrazine hydrochloride-[D<sub>5</sub>]<sup>[2]</sup> were synthesized according to the previously reported procedure.

## 2. Typical procedure for synthesis of 4

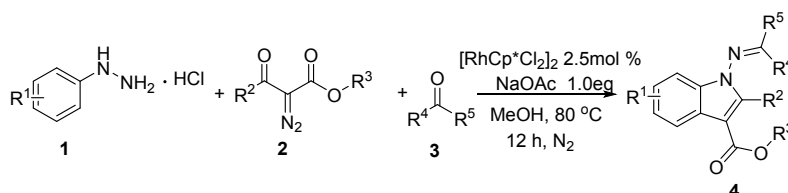

To a test tube equipped with magnetic stir bar, phenylhydrazine hydrochloride (**1a**, 28.9 mg, 0.20 mmol), ethyl diazoacetate (**2a**, 46.8 mg, 0.30 mmol, 1.5 equiv),  $[\text{RhCp}^*\text{Cl}_2]_2$  (3.09 mg, 0.005 mmol, 2.5 mmol %) and NaOAc (16.4 mg, 0.20 mmol, 1.0 equiv) were added sequentially. The tube was evacuated and backfilled with nitrogen for three cycles. Acetone (**3a**, 23.2 mg, 0.40 mmol, 2.0 equiv) was dissolved in MeOH (2.0 mL), and added under nitrogen atmosphere and the tube was sealed. The tube was immersed in an oil bath ( $80^\circ\text{C}$ ) and stirred for 12 h. After removal of the solvent under reduced pressure, purification was performed by flash column chromatography on silica gel with petroleum ether/ethyl acetate (gradient mixture ratio from 100:0 to 90:15) as eluent to afford **4a** (45 mg, 87%).

## 3. Characterization data of compounds 4

### Ethyl 2-methyl-1-(propan-2-ylideneamino)-1H-indole-3-carboxylate (**4a**)

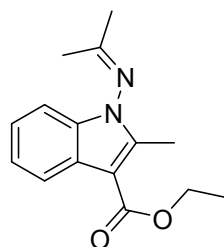

Yield: 87%, brown oil.

$^1\text{H}$  NMR (400 MHz,  $\text{CDCl}_3$ )  $\delta$  8.15 (d,  $J = 7.6$  Hz, 1H), 7.24 – 7.14 (m, 2H), 6.96 (d,  $J = 7.9$  Hz, 1H), 4.40 (q,  $J = 14.2, 7.1$  Hz, 2H), 2.58 (s, 3H), 2.38 (s, 3H), 1.76 (s, 3H), 1.45 (t,  $J = 7.1$  Hz, 3H).  $^{13}\text{C}$  NMR (100 MHz,  $\text{CDCl}_3$ )  $\delta$  181.1, 166.1, 141.3, 131.9, 125.0, 121.9, 121.6, 121.3, 108.8, 101.9, 59.3, 24.8, 20.0, 14.5, 11.5. HRMS (ESI): Calcd for  $\text{C}_{15}\text{H}_{18}\text{N}_2\text{O}_2$   $[\text{M}+\text{H}]^+$ : 259.1441; found: 259.1445.

**Ethyl 5-fluoro-2-methyl-1-(propan-2-ylideneamino)-1H-indole-3-carboxylate (4b)**

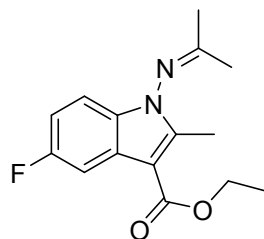

Yield: 80%, brown oil.

**<sup>1</sup>H NMR (400 MHz, CDCl<sub>3</sub>)** δ 7.80 (dd, *J* = 9.9, 2.2 Hz, 1H), 6.93 (dd, *J* = 8.8, 2.4 Hz, 1H), 6.91 – 6.86 (m, 1H), 4.40 (q, *J* = 7.1 Hz, 2H), 2.57 (s, 3H), 2.40 (s, 3H), 1.78 (s, 3H), 1.45 (t, *J* = 7.1 Hz, 3H). **<sup>13</sup>C NMR (100 MHz, CDCl<sub>3</sub>)** δ 181.5, 165.8, 159.2 (d, *J*<sub>CF</sub> = 235.9 Hz), 142.5, 128.6, 125.7 (d, *J*<sub>CF</sub> = 11.2 Hz), 110.2 (d, *J*<sub>CF</sub> = 26.5 Hz), 109.6 (d, *J*<sub>CF</sub> = 9.8 Hz), 106.8 (d, *J*<sub>CF</sub> = 25.5 Hz), 102.1 (d, *J*<sub>CF</sub> = 4.2 Hz), 59.5, 24.9, 20.0, 14.6, 11.6. **<sup>19</sup>F NMR (376 MHz, CDCl<sub>3</sub>)** δ -122.01. **HRMS (ESI):** Calcd for C<sub>15</sub>H<sub>17</sub>FN<sub>2</sub>O<sub>2</sub> [M+H]<sup>+</sup>: 277.1347; found: 277.1346

**Ethyl 5-chloro-2-methyl-1-(propan-2-ylideneamino)-1H-indole-3-carboxylate (4c)**

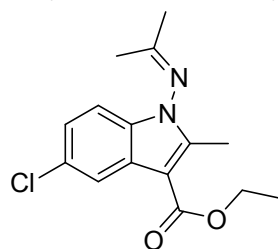

Yield: 77%, brown oil.

**<sup>1</sup>H NMR (400 MHz, CDCl<sub>3</sub>)** δ 8.12 (d, *J* = 2.0 Hz, 1H), 7.13 (dd, *J* = 8.6, 2.0 Hz, 1H), 6.88 (d, *J* = 8.6 Hz, 1H), 4.41 (q, *J* = 7.1 Hz, 2H), 2.57 (s, 3H), 2.40 (s, 3H), 1.77 (s, 3H), 1.46 (t, *J* = 7.1 Hz, 3H). **<sup>13</sup>C NMR (100 MHz, CDCl<sub>3</sub>)** δ 181.6, 165.6, 142.4, 130.4, 127.5, 126.0, 122.3, 121.0, 109.90, 101.9, 59.6, 24.9, 20.0, 14.6, 11.6. **HRMS (ESI):** Calcd for C<sub>15</sub>H<sub>17</sub>ClN<sub>2</sub>O<sub>2</sub> [M+H]<sup>+</sup>: 293.1051; found: 293.1032.

**Ethyl 5-bromo-2-methyl-1-(propan-2-ylideneamino)-1H-indole-3-carboxylate (4d)**

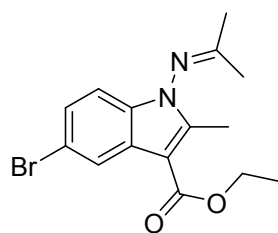

Yield: 81%, brown oil.

**<sup>1</sup>H NMR (400 MHz, CDCl<sub>3</sub>)** δ 8.28 (s, 1H), 7.26 (d, *J* = 8.6 Hz, 1H), 6.84 (d, *J* = 8.6 Hz, 1H), 4.41 (q, *J* = 7.1 Hz, 2H), 2.57 (s, 3H), 2.39 (s, 3H), 1.76 (s, 3H), 1.45 (t, *J* = 7.1 Hz, 3H). **<sup>13</sup>C NMR (100 MHz, CDCl<sub>3</sub>)** δ 181.7, 165.6, 142.2, 130.7, 126.6, 124.9, 124.0, 115.3, 110.3, 101.8, 59.6, 25.0, 20.1, 14.6, 11.6. **HRMS (ESI):** Calcd for C<sub>15</sub>H<sub>17</sub>BrN<sub>2</sub>O<sub>2</sub> [M+H]<sup>+</sup>: 377.0546; found: 377.0546.

**Ethyl 2,5-dimethyl-1-(propan-2-ylideneamino)-1H-indole-3-carboxylate (4e)**

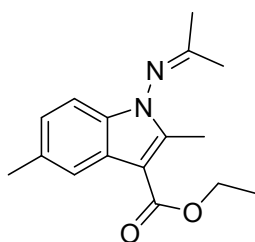

Yield: 74%, brown oil.

**<sup>1</sup>H NMR (400 MHz, CDCl<sub>3</sub>)** δ 7.95 (s, 1H), 7.00 (d, *J* = 8.1 Hz, 1H), 6.85 (d, *J* = 8.3 Hz, 1H), 4.41 (q, *J* = 7.0 Hz, 2H), 2.56 (s, 3H), 2.47 (s, 3H), 2.38 (s, 3H), 1.76 (s, 3H), 1.45 (t, *J* = 7.1 Hz, 3H). **<sup>13</sup>C NMR (100 MHz, CDCl<sub>3</sub>)** δ 180.9, 166.2, 141.1, 131.1, 130.4, 125.3, 123.4, 121.1, 108.6, 101.4, 59.3, 24.9, 21.6, 20.0, 14.6, 11.6. **HRMS (ESI):** Calcd for C<sub>16</sub>H<sub>20</sub>N<sub>2</sub>O<sub>2</sub> [M+H]<sup>+</sup>: 273.1598; found: 273.1594.

**Ethyl 5-isopropyl-2-methyl-1-(propan-2-ylideneamino)-1H-indole-3-carboxylate (4f)**

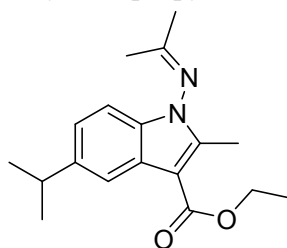

Yield: 51%, brown oil.

**<sup>1</sup>H NMR (400 MHz, CDCl<sub>3</sub>)** δ 8.03 (s, 1H), 7.06 (d, *J* = 8.4 Hz, 1H), 6.88 (d, *J* = 8.4 Hz, 1H), 4.41 (q, *J* = 13.7, 6.7 Hz, 2H), 3.10 – 2.98 (m, 1H), 2.56 (s, 3H), 2.38 (s, 3H), 1.78 (s, 3H), 1.46 (t, *J* = 6.7 Hz, 3H), 1.32 (d, *J* = 6.9 Hz, 6H). **<sup>13</sup>C NMR (100 MHz, CDCl<sub>3</sub>)** δ 180.7, 166.2, 142.5, 141.2, 130.7, 125.2, 121.1, 118.4, 108.7, 101.7, 59.2, 34.3, 24.9, 24.5, 24.5, 20.1, 14.6, 11.6. **HRMS (ESI):** Calcd for C<sub>18</sub>H<sub>24</sub>N<sub>2</sub>O<sub>2</sub> [M+H]<sup>+</sup>: 301.1911; found: 301.1912.

**Ethyl 5-(tert-butyl)-2-methyl-1-(propan-2-ylideneamino)-1H-indole-3-carboxylate (4g)**

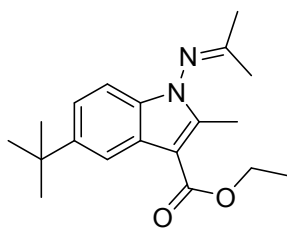

Yield: 51%, yellow oil.

**<sup>1</sup>H NMR (400 MHz, CDCl<sub>3</sub>)** δ 8.21 (d, *J* = 1.1 Hz, 1H), 7.27 – 7.23 (m, 1H), 6.89 (d, *J* = 8.6 Hz, 1H), 4.40 (q, *J* = 7.1 Hz, 2H), 2.57 (s, 3H), 2.38 (s, 3H), 1.78 (s, 3H), 1.47 (t, *J* = 7.1 Hz, 3H), 1.40 (s, 9H). **<sup>13</sup>C NMR (100 MHz, CDCl<sub>3</sub>)** δ 180.7, 166.3, 144.7, 141.3, 130.3, 124.9, 120.2, 117.3, 108.5, 101.8, 59.3, 34.7, 31.8, 24.9, 20.3, 14.6, 11.6. **HRMS (ESI):** Calcd for C<sub>19</sub>H<sub>26</sub>N<sub>2</sub>O<sub>2</sub> [M+H]<sup>+</sup>: 315.2067; found: 315.2067.

**Ethyl 5-methoxy-2-methyl-1-(propan-2-ylideneamino)-1H-indole-3-carboxylate (4h)**

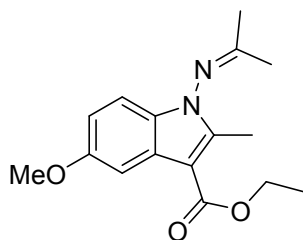

Yield: 60%, yellow oil.

**<sup>1</sup>H NMR (400 MHz, CDCl<sub>3</sub>)** δ 7.68 (d, *J* = 1.9 Hz, 1H), 6.83 (dt, *J* = 8.8, 5.4 Hz, 2H), 4.40 (q, *J* = 13.8, 6.8 Hz, 2H), 3.88 (s, 3H), 2.55 (s, 3H), 2.38 (s, 3H), 1.78 (s, 3H), 1.45 (t, *J* = 7.1 Hz, 3H).

**<sup>13</sup>C NMR (100 MHz, CDCl<sub>3</sub>)** δ 181.0, 166.1, 155.7, 141.1, 127.2, 126.0, 111.8, 109.7, 103.42, 101.6, 59.3, 55.6, 24.9, 20.0, 14.6, 11.7. **HRMS (ESI):** Calcd for C<sub>16</sub>H<sub>20</sub>N<sub>2</sub>O<sub>3</sub> [M+H]<sup>+</sup>: 289.1547; found: 289.1545.

#### Ethyl 5-cyano-2-methyl-1-(propan-2-ylideneamino)-1H-indole-3-carboxylate (4i)

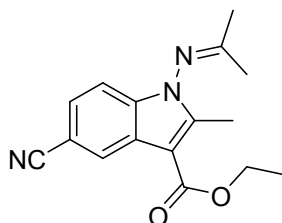

Yield: 54%, white solid, mp 105-107 °C.

**<sup>1</sup>H NMR (400 MHz, CDCl<sub>3</sub>)** δ 8.49 (d, *J* = 1.4 Hz, 1H), 7.41 (dd, *J* = 8.5, 1.5 Hz, 1H), 7.04 (d, *J* = 8.5 Hz, 1H), 4.43 (q, *J* = 7.1 Hz, 2H), 2.61 (s, 3H), 2.43 (s, 3H), 1.78 (s, 3H), 1.47 (t, *J* = 7.1 Hz, 3H). **<sup>13</sup>C NMR (100 MHz, CDCl<sub>3</sub>)** δ 182.4, 165.1, 143.7, 133.3, 126.9, 125.1, 124.7, 120.5, 109.7, 104.7, 103.0, 59.9, 25.0, 20.1, 14.6, 11.6. **HRMS (ESI):** Calcd for C<sub>16</sub>H<sub>17</sub>N<sub>3</sub>O<sub>2</sub> [M+H]<sup>+</sup>: 284.1394; found: 284.1394.

#### Ethyl 2-methyl-1-(propan-2-ylideneamino)-5-(trifluoromethyl)-1H-indole-3-carboxylate (4j)

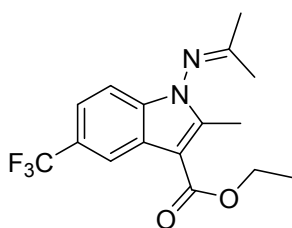

Yield: 73%, white solid, mp 180-182 °C.

**<sup>1</sup>H NMR (400 MHz, CDCl<sub>3</sub>)** δ 8.47 (s, 1H), 7.41 (dd, *J* = 8.6, 1.5 Hz, 1H), 7.04 (d, *J* = 8.5 Hz, 1H), 4.43 (q, *J* = 7.1 Hz, 2H), 2.61 (s, 3H), 2.42 (s, 3H), 1.77 (s, 3H), 1.47 (t, *J* = 7.1 Hz, 3H). **<sup>13</sup>C NMR (100 MHz, CDCl<sub>3</sub>)** δ 182.0, 165.5, 143.1, 133.1, 125.2 (q, *J*<sub>CF</sub> = 271.7 Hz), 124.5, 123.9 (q, *J*<sub>CF</sub> = 31.7 Hz), 119.2 (q, *J*<sub>CF</sub> = 4.4 Hz), 118.8 (q, *J*<sub>CF</sub> = 3.5 Hz), 109.1, 102.9, 59.7, 25.0, 20.1, 14.5, 11.6. **<sup>19</sup>F NMR (376 MHz, CDCl<sub>3</sub>)** δ -60.48. **HRMS (ESI):** Calcd for C<sub>16</sub>H<sub>17</sub>F<sub>3</sub>N<sub>2</sub>O<sub>2</sub> [M+H]<sup>+</sup>: 327.1315; found: 327.1303.

#### Ethyl 2,7-dimethyl-1-(propan-2-ylideneamino)-1H-indole-3-carboxylate (4k)

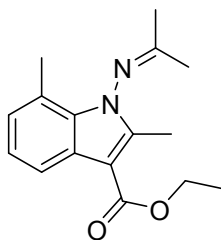

Yield: 85%, yellow oil.

**<sup>1</sup>H NMR (400 MHz, CDCl<sub>3</sub>)** δ 8.02 (d, *J* = 8.0 Hz, 1H), 7.08 (t, *J* = 7.6 Hz, 1H), 6.90 (d, *J* = 7.1 Hz, 1H), 4.40 (q, *J* = 7.0 Hz, 2H), 2.50 (s, 3H), 2.41 (s, 3H), 2.36 (s, 3H), 1.72 (s, 3H), 1.45 (t, *J* = 7.1 Hz, 3H). **<sup>13</sup>C NMR (100 MHz, CDCl<sub>3</sub>)** δ 181.6, 166.2, 140.2, 131.4, 125.5, 124.6, 121.5, 120.3, 119.1, 101.8, 59.3, 24.7, 19.9, 19.0, 14.6, 11.3. **HRMS (ESI):** Calcd for C<sub>16</sub>H<sub>20</sub>N<sub>2</sub>O<sub>2</sub> [M+H]<sup>+</sup>: 273.1598; found: 273.1602.

**Ethyl 7-fluoro-2-methyl-1-(propan-2-ylideneamino)-1H-indole-3-carboxylate (4l)**

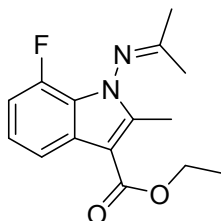

Yield: 76%, white solid, mp 83-85 °C.

**<sup>1</sup>H NMR (400 MHz, CDCl<sub>3</sub>)** δ 7.93 (d, *J* = 8.1 Hz, 1H), 7.09 (td, *J* = 8.0, 4.7 Hz, 1H), 6.85 (dd, *J* = 12.2, 7.9 Hz, 1H), 4.40 (q, *J* = 7.1 Hz, 2H), 2.58 (s, 3H), 2.35 (s, 3H), 1.84 (s, 3H), 1.45 (t, *J* = 7.1 Hz, 3H). **<sup>13</sup>C NMR (100 MHz, CDCl<sub>3</sub>)** δ 181.3, 165.8, 148.5 (d, *J* = 245.2 Hz), 142.5, 128.8 (d, *J* = 4.0 Hz), 121.6 (d, *J* = 6.6 Hz), 120.3 (d, *J* = 9.2 Hz), 117.1 (d, *J* = 3.6 Hz), 107.9 (d, *J* = 17.5 Hz), 102.7, 59.5, 24.9, 19.7 (d, *J* = 3.6 Hz), 14.6, 11.4. **<sup>19</sup>F NMR (376 MHz, CDCl<sub>3</sub>)** δ -137.03. **HRMS (ESI):** Calcd for C<sub>15</sub>H<sub>17</sub>FN<sub>2</sub>O<sub>2</sub> [M+H]<sup>+</sup>: 277.1347; found: 277.1343

**Ethyl 6-chloro-2-methyl-1-(propan-2-ylideneamino)-1H-indole-3-carboxylate (4m)**

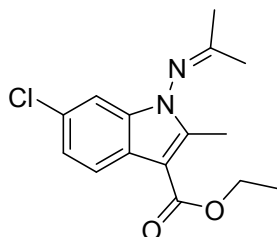

Yield: 54%, yellow oil.

**<sup>1</sup>H NMR (400 MHz, CDCl<sub>3</sub>)** δ 8.05 (d, *J* = 8.5 Hz, 1H), 7.17 (d, *J* = 8.5 Hz, 1H), 6.97 (s, 1H), 4.40 (q, *J* = 7.1 Hz, 2H), 2.56 (s, 3H), 2.40 (s, 3H), 1.78 (s, 3H), 1.44 (t, *J* = 7.1 Hz, 3H). **<sup>13</sup>C NMR (100 MHz, CDCl<sub>3</sub>)** δ 181.8, 165.7, 142.0, 132.3, 127.9, 123.6, 122.3, 122.2, 108.8, 102.3, 59.5, 24.9, 20.0, 14.5, 11.5. **HRMS (ESI):** Calcd for C<sub>15</sub>H<sub>17</sub>ClN<sub>2</sub>O<sub>2</sub> [M+H]<sup>+</sup>: 293.1051; found: 293.1033.

**Ethyl 2,6-dimethyl-1-(propan-2-ylideneamino)-1H-indole-3-carboxylate (4n)**

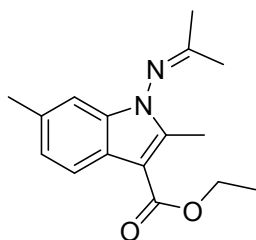

Yield: 69%, brown oil.

**<sup>1</sup>H NMR (400 MHz, CDCl<sub>3</sub>)** δ 8.01 (d, *J* = 8.1 Hz, 1H), 7.04 (d, *J* = 8.0 Hz, 1H), 6.75 (s, 1H), 4.39 (q, *J* = 7.0 Hz, 2H), 2.56 (s, 3H), 2.44 (s, 3H), 2.40 (s, 3H), 1.77 (s, 3H), 1.44 (t, *J* = 7.1 Hz, 3H). **<sup>13</sup>C NMR (100 MHz, CDCl<sub>3</sub>)** δ 181.0, 166.2, 140.7, 132.3, 131.9, 123.3, 122.9, 121.0, 108.8, 101.8, 59.2, 24.9, 21.6, 20.0, 14.6, 11.5. **HRMS (ESI)**: Calcd for C<sub>16</sub>H<sub>20</sub>N<sub>2</sub>O<sub>2</sub> [M+H]<sup>+</sup>: 273.1598; found: 273.1594.

**Ethyl 6-fluoro-2-methyl-1-(propan-2-ylideneamino)-1H-indole-3-carboxylate (4o)**

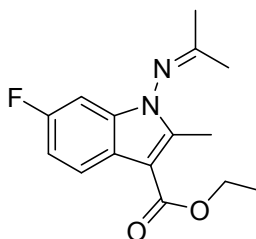

Yield: 19%, yellow oil.

**<sup>1</sup>H NMR (400 MHz, CDCl<sub>3</sub>)** δ 8.07 (dd, *J* = 8.8, 5.4 Hz, 1H), 6.97 (ddd, *J* = 9.6, 8.8, 2.4 Hz, 1H), 6.66 (dd, *J* = 9.1, 2.3 Hz, 1H), 4.40 (q, *J* = 7.1 Hz, 2H), 2.56 (s, 3H), 2.40 (s, 3H), 1.79 (s, 3H), 1.45 (t, *J* = 7.1 Hz, 3H). **<sup>13</sup>C NMR (100 MHz, CDCl<sub>3</sub>)** δ 181.6, 165.8, 159.7 (d, *J*<sub>CF</sub> = 238.9 Hz), 141.9 (d, *J*<sub>CF</sub> = 2.9 Hz), 131.9 (d, *J*<sub>CF</sub> = 12.1 Hz), 122.4 (d, *J*<sub>CF</sub> = 9.6 Hz), 121.4, 110.0 (d, *J*<sub>CF</sub> = 23.8 Hz), 102.2, 95.5 (d, *J*<sub>CF</sub> = 26.8 Hz), 59.5, 24.9, 20.0, 14.6, 11.6. **<sup>19</sup>F NMR (376 MHz, CDCl<sub>3</sub>)** δ -120.47. **HRMS (ESI)**: Calcd for C<sub>15</sub>H<sub>17</sub>FN<sub>2</sub>O<sub>2</sub> [M+H]<sup>+</sup>: 277.1347; found: 277.1347.

**Ethyl 4-fluoro-2-methyl-1-(propan-2-ylideneamino)-1H-indole-3-carboxylate (4o')**

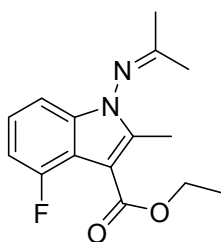

Yield: 53%, yellow oil.

**<sup>1</sup>H NMR (400 MHz, CDCl<sub>3</sub>)** δ 7.09 (td, *J* = 8.0, 4.5 Hz, 1H), 6.87 (ddd, *J* = 11.5, 7.9, 0.7 Hz, 1H), 6.74 (dd, *J* = 8.1, 0.6 Hz, 1H), 4.38 (q, *J* = 7.1 Hz, 2H), 2.54 (s, 3H), 2.39 (s, 3H), 1.76 (s, 3H), 1.42 (t, *J* = 7.1 Hz, 3H). **<sup>13</sup>C NMR (100 MHz, CDCl<sub>3</sub>)** δ 181.8, 165.2, 155.7 (d, *J*<sub>CF</sub> = 252.4 Hz), 141.1, 134.5 (d, *J*<sub>CF</sub> = 10.4 Hz), 122.6 (d, *J*<sub>CF</sub> = 8.1 Hz), 112.8 (d, *J*<sub>CF</sub> = 19.4 Hz), 107.9 (d, *J*<sub>CF</sub> = 22.3 Hz), 105.0 (d, *J*<sub>CF</sub> = 3.9 Hz), 101.5 (d, *J*<sub>CF</sub> = 3.3 Hz), 59.8, 24.9, 20.0, 14.3, 11.6. **<sup>19</sup>F NMR (376 MHz, CDCl<sub>3</sub>)** δ -112.25. **HRMS (ESI)**: Calcd for C<sub>15</sub>H<sub>17</sub>FN<sub>2</sub>O<sub>2</sub> [M+H]<sup>+</sup>: 277.1347; found: 277.1344.

**Ethyl 2,5,6-trimethyl-1-(propan-2-ylideneamino)-1H-indole-3-carboxylate (4p)**

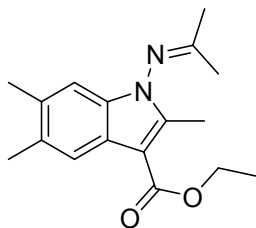

Yield: 55%, brown oil.

**<sup>1</sup>H NMR (400 MHz, CDCl<sub>3</sub>)** δ 7.90 (s, 1H), 6.73 (s, 1H), 4.40 (q, *J* = 7.1 Hz, 2H), 2.54 (s, 3H), 2.39 (s, 3H), 2.37 (s, 3H), 2.34 (s, 3H), 1.77 (s, 3H), 1.45 (t, *J* = 7.1 Hz, 3H). **<sup>13</sup>C NMR (100 MHz, CDCl<sub>3</sub>)** δ 180.9, 166.3, 140.3, 131.1, 131.0, 130.4, 123.5, 121.6, 109.3, 101.4, 59.3, 24.9, 20.4, 20.2, 20.1, 14.7, 11.6. **HRMS (ESI):** Calcd for C<sub>17</sub>H<sub>22</sub>N<sub>2</sub>O<sub>2</sub> [M+H]<sup>+</sup>: 287.1754; found: 287.1757.

**Ethyl 5,6-dichloro-2-methyl-1-(propan-2-ylideneamino)-1H-indole-3-carboxylate (4q)**

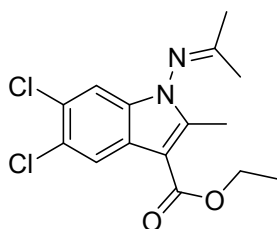

Yield: 53%, yellow oil.

**<sup>1</sup>H NMR (400 MHz, CDCl<sub>3</sub>)** δ 8.21 (s, 1H), 7.08 (s, 1H), 4.40 (q, *J* = 7.1 Hz, 2H), 2.55 (s, 3H), 2.41 (s, 3H), 1.79 (s, 3H), 1.45 (t, *J* = 7.1 Hz, 3H). **<sup>13</sup>C NMR (100 MHz, CDCl<sub>3</sub>)** δ 182.3, 165.3, 143.1, 130.8, 126.0, 125.8, 124.6, 122.6, 110.4, 101.9, 59.7, 25.0, 20.1, 14.6, 11.7. **HRMS (ESI):** Calcd for C<sub>15</sub>H<sub>16</sub>Cl<sub>2</sub>N<sub>2</sub>O<sub>2</sub> [M+H]<sup>+</sup>: 327.0662; found: 327.0656.

**Ethyl 6-chloro-5-fluoro-2-methyl-1-(propan-2-ylideneamino)-1H-indole-3-carboxylate (4r)**

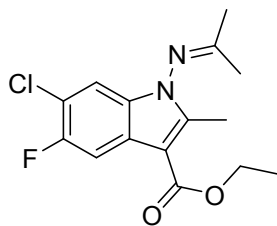

Yield: 49%, brown solid, mp 108-110 °C.

**<sup>1</sup>H NMR (400 MHz, CDCl<sub>3</sub>)** δ 7.88 (d, *J* = 10.1 Hz, 1H), 7.00 (d, *J* = 6.1 Hz, 1H), 4.40 (q, *J* = 7.1 Hz, 2H), 2.55 (s, 3H), 2.41 (s, 3H), 1.79 (s, 3H), 1.45 (t, *J* = 7.1 Hz, 3H). **<sup>13</sup>C NMR (100 MHz, CDCl<sub>3</sub>)** δ 182.3, 165.4, 154.3 (d, *J* = 239.3 Hz), 143.0, 128.4, 124.2 (d, *J* = 9.9 Hz), 115.7 (d, *J* = 21.6 Hz), 110.1, 108.0 (d, *J* = 25.3 Hz), 102.4 (d, *J* = 4.3 Hz), 59.7, 25.0, 20.1, 14.6, 11.7. **<sup>19</sup>F NMR (376 MHz, CDCl<sub>3</sub>)** δ -124.22. **HRMS (ESI):** Calcd for C<sub>15</sub>H<sub>16</sub>ClFN<sub>2</sub>O<sub>2</sub> [M+H]<sup>+</sup>: 311.0957; found: 311.0947.

**Ethyl 7-chloro-4-fluoro-2-methyl-1-(propan-2-ylideneamino)-1H-indole-3-carboxylate (4s)**



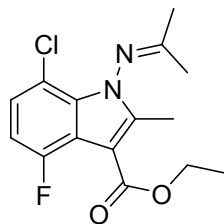

Yield: 47%, yellow oil.

**<sup>1</sup>H NMR (400 MHz, CDCl<sub>3</sub>)** δ 7.05 (dd, *J* = 8.5, 3.9 Hz, 1H), 6.79 (dd, *J* = 10.6, 8.5 Hz, 1H), 4.38 (q, *J* = 7.1 Hz, 2H), 2.49 (s, 3H), 2.38 (s, 3H), 1.76 (s, 3H), 1.41 (t, *J* = 7.1 Hz, 3H). **<sup>13</sup>C NMR (100 MHz, CDCl<sub>3</sub>)** δ 183.3, 164.8, 154.4 (d, *J* = 252.2 Hz), 141.7, 129.8 (d, *J* = 10.2 Hz), 124.0 (d, *J* = 8.2 Hz), 115.3 (d, *J* = 20.6 Hz), 110.8 (d, *J* = 4.0 Hz), 108.2 (d, *J* = 23.8 Hz), 102.2 (d, *J* = 3.7 Hz), 60.2, 24.8, 20.2, 14.3, 11.5. **<sup>19</sup>F NMR (376 MHz, CDCl<sub>3</sub>)** δ -114.25. **HRMS (ESI):** Calcd for C<sub>15</sub>H<sub>16</sub>ClFN<sub>2</sub>O<sub>2</sub> [M+H]<sup>+</sup>: 311.0957; found: 311.0952.

**Ethyl 2-ethyl-1-(propan-2-ylideneamino)-1H-indole-3-carboxylate (4t)**

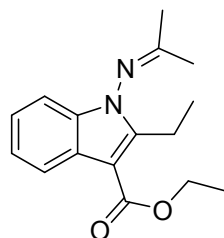

Yield: 75%, yellow oil.

**<sup>1</sup>H NMR (400 MHz, CDCl<sub>3</sub>)** δ 8.17 (d, *J* = 7.8 Hz, 1H), 7.24 – 7.15 (m, 2H), 6.91 (d, *J* = 7.9 Hz, 1H), 4.41 (q, *J* = 7.1 Hz, 2H), 3.07 (q, *J* = 11.2 Hz, 2H), 2.39 (s, 3H), 1.78 (s, 3H), 1.45 (t, *J* = 7.1 Hz, 3H), 1.20 (t, *J* = 7.4 Hz, 3H). **<sup>13</sup>C NMR (100 MHz, CDCl<sub>3</sub>)** δ 180.6, 165.8, 147.1, 131.7, 125.2, 122.0, 121.6, 121.5, 108.9, 101.1, 59.3, 24.9, 20.2, 18.8, 14.5, 13.0. **HRMS (ESI):** Calcd for C<sub>16</sub>H<sub>20</sub>N<sub>2</sub>O<sub>2</sub> [M+H]<sup>+</sup>: 273.1598; found: 273.1598.

**Ethyl 1-(propan-2-ylideneamino)-2-propyl-1H-indole-3-carboxylate (4u)**

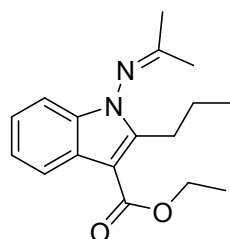

Yield: 65%, yellow oil.

**<sup>1</sup>H NMR (400 MHz, CDCl<sub>3</sub>)** δ 8.18 (d, *J* = 7.5 Hz, 1H), 7.20 (td, *J* = 15.0, 7.2 Hz, 2H), 6.90 (d, *J* = 7.7 Hz, 1H), 4.40 (q, *J* = 6.7 Hz, 2H), 3.18 – 2.89 (m, 2H), 2.39 (s, 3H), 1.77 (s, 3H), 1.63 (m, 2H), 1.45 (t, *J* = 7.1 Hz, 3H), 0.98 (t, *J* = 7.3 Hz, 3H). **<sup>13</sup>C NMR (100 MHz, CDCl<sub>3</sub>)** δ 180.4, 165.8, 145.8, 131.6, 125.2, 122.0, 121.6, 121.5, 108.9, 101.7, 59.3, 27.2, 24.9, 22.1, 20.3, 14.5, 14.0. **HRMS (ESI):** Calcd for C<sub>17</sub>H<sub>22</sub>N<sub>2</sub>O<sub>2</sub> [M+H]<sup>+</sup>: 287.1754; found: 287.1758.

**Methyl 2-methyl-1-(propan-2-ylideneamino)-1H-indole-3-carboxylate (4v)**

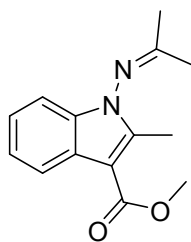

Yield: 63%, brown oil.

**<sup>1</sup>H NMR (400 MHz, CDCl<sub>3</sub>)** δ 8.13 (d, *J* = 7.6 Hz, 1H), 7.25 – 7.14 (m, 2H), 6.96 (d, *J* = 7.9 Hz, 1H), 3.93 (s, 3H), 2.58 (s, 3H), 2.39 (s, 3H), 1.77 (s, 3H). **<sup>13</sup>C NMR (100 MHz, CDCl<sub>3</sub>)** δ 181.1, 166.5, 141.4, 131.9, 125.0, 122.0, 121.7, 121.3, 108.93, 101.8, 50.6, 24.9, 20.0, 11.5. **HRMS (ESI):** Calcd for C<sub>14</sub>H<sub>16</sub>N<sub>2</sub>O<sub>2</sub> [M+H]<sup>+</sup>: 245.1285; found: 245.1281.

#### Isopropyl 2-methyl-1-(propan-2-ylideneamino)-1H-indole-3-carboxylate (4w)

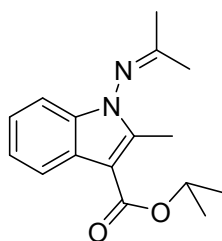

Yield: 72%, brown oil.

**<sup>1</sup>H NMR (400 MHz, CDCl<sub>3</sub>)** δ 8.16 (d, *J* = 7.5 Hz, 1H), 7.25 – 7.15 (m, 2H), 6.96 (d, *J* = 8.0 Hz, 1H), 5.30 (m, *J* = 12.6, 6.2 Hz, 1H), 2.59 (s, 3H), 2.39 (s, 3H), 1.77 (s, 3H), 1.44 (s, 3H), 1.42 (s, 3H). **<sup>13</sup>C NMR (100 MHz, CDCl<sub>3</sub>)** δ 181.0, 165.7, 141.3, 131.9, 125.1, 121.9, 121.6, 121.4, 108.8, 102.3, 66.5, 24.9, 22.3, 22.3, 20.0, 11.5. **HRMS (ESI):** Calcd for C<sub>16</sub>H<sub>20</sub>N<sub>2</sub>O<sub>2</sub> [M+H]<sup>+</sup>: 273.1598; found: 273.1596.

#### Tert-butyl 2-methyl-1-(propan-2-ylideneamino)-1H-indole-3-carboxylate (4x)

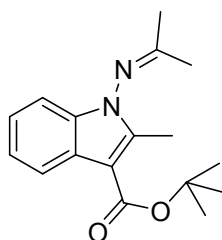

Yield: 84%, yellow oil.

**<sup>1</sup>H NMR (400 MHz, CDCl<sub>3</sub>)** δ 8.13 (d, *J* = 7.8 Hz, 1H), 7.24 – 7.13 (m, 2H), 6.95 (d, *J* = 7.6 Hz, 1H), 2.57 (s, 3H), 2.38 (s, 3H), 1.76 (s, 3H), 1.67 (s, 9H). **<sup>13</sup>C NMR (100 MHz, CDCl<sub>3</sub>)** δ 180.9, 165.5, 141.0, 131.8, 125.1, 121.8, 121.5, 121.3, 108.8, 103.3, 79.6, 28.7, 24.9, 20.0, 11.5. **HRMS (ESI):** Calcd for C<sub>17</sub>H<sub>22</sub>N<sub>2</sub>O<sub>2</sub> [M+H]<sup>+</sup>: 287.1754; found: 287.1756.

#### Benzyl 2-methyl-1-(propan-2-ylideneamino)-1H-indole-3-carboxylate (4y)

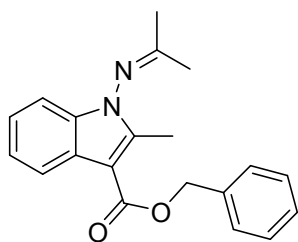

Yield: 52%, yellow oil.

**<sup>1</sup>H NMR (400 MHz, CDCl<sub>3</sub>)** δ 8.14 (d, *J* = 7.3 Hz, 1H), 7.49 (t, *J* = 6.8 Hz, 2H), 7.39 (t, *J* = 7.6 Hz, 2H), 7.35 – 7.30 (m, 1H), 7.24 – 7.14 (m, 2H), 6.96 (d, *J* = 7.2 Hz, 1H), 5.42 (s, 2H), 2.59 (s, 3H), 2.39 (s, 3H), 1.77 (s, 3H). **<sup>13</sup>C NMR (100 MHz, CDCl<sub>3</sub>)** δ 181.2, 165.8, 141.7, 137.0, 132.0, 128.5, 128.0, 127.8, 125.0, 122.0, 121.8, 121.4, 108.9, 101.6, 65.2, 24.9, 20.1, 11.6. **HRMS (ESI):** Calcd for C<sub>20</sub>H<sub>20</sub>N<sub>2</sub>O<sub>2</sub> [M+H]<sup>+</sup>: 321.1598; found: 321.1600.

**Ethyl 2-methyl-1-(pentan-3-ylideneamino)-1H-indole-3-carboxylate (4z)**

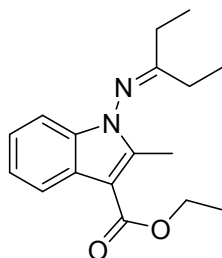

Yield: 37%, yellow oil.

**<sup>1</sup>H NMR (400 MHz, CDCl<sub>3</sub>)** δ 8.15 (d, *J* = 7.4 Hz, 1H), 7.19 (dtd, *J* = 15.0, 7.2, 1.2 Hz, 2H), 6.95 (d, *J* = 7.7 Hz, 1H), 4.41 (q, *J* = 7.1 Hz, 2H), 2.70 (q, *J* = 7.4 Hz, 2H), 2.59 (s, 3H), 2.10 (q, *J* = 11.2, 5.3 Hz, 2H), 1.46 (t, *J* = 7.1 Hz, 3H), 1.38 (t, *J* = 7.4 Hz, 3H), 0.96 (t, *J* = 7.7 Hz, 3H). **<sup>13</sup>C NMR (100 MHz, CDCl<sub>3</sub>)** δ 189.5, 166.1, 141.5, 132.2, 125.1, 121.9, 121.6, 121.3, 108.8, 101.9, 59.3, 29.0, 25.0, 14.6, 11.6, 11.1, 10.5. **HRMS (ESI):** Calcd for C<sub>17</sub>H<sub>22</sub>N<sub>2</sub>O<sub>2</sub> [M+H]<sup>+</sup>: 287.1754; found: 287.1751.

**Ethyl 1-(cyclopentylideneamino)-2-methyl-1H-indole-3-carboxylate (4za)**

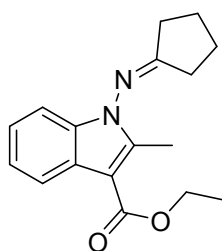

Yield: 77%, yellow oil.

**<sup>1</sup>H NMR (400 MHz, CDCl<sub>3</sub>)** δ 8.16 (d, *J* = 7.3 Hz, 1H), 7.25 – 7.15 (m, 2H), 7.01 (d, *J* = 7.8 Hz, 1H), 4.40 (q, *J* = 7.1 Hz, 2H), 2.83 (t, *J* = 7.4 Hz, 2H), 2.62 (s, 3H), 2.12 (t, *J* = 7.2 Hz, 2H), 2.01 – 1.91 (m, 2H), 1.86 – 1.77 (m, 2H), 1.45 (t, *J* = 7.1 Hz, 3H). **<sup>13</sup>C NMR (100 MHz, CDCl<sub>3</sub>)** δ 194.1, 166.1, 141.0, 131.2, 125.1, 121.9, 121.6, 121.4, 108.8, 101.8, 59.3, 33.7, 31.7, 24.5, 24.4, 14.6, 11.6. **HRMS (ESI):** Calcd for C<sub>17</sub>H<sub>20</sub>N<sub>2</sub>O<sub>2</sub> [M+H]<sup>+</sup>: 285.1598; found: 285.1598.

**Ethyl 1-(cyclohexylideneamino)-2-methyl-1H-indole-3-carboxylate (4zb)**

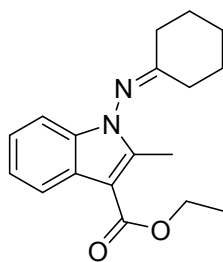

Yield: 56%, brown oil.

**<sup>1</sup>H NMR (400 MHz, CDCl<sub>3</sub>)** δ 8.14 (d, *J* = 7.4 Hz, 1H), 7.20 (ddd, *J* = 17.6, 11.6, 4.0 Hz, 2H), 6.99 (d, *J* = 7.7 Hz, 1H), 4.41 (q, *J* = 7.0 Hz, 2H), 2.71 (t, *J* = 6.3 Hz, 2H), 2.60 (s, 3H), 2.05 (t, *J* = 6.3 Hz, 2H), 1.95 (dt, *J* = 12.9, 6.3 Hz, 2H), 1.75 – 1.62 (m, 4H), 1.45 (t, *J* = 7.1 Hz, 3H). **<sup>13</sup>C NMR (100 MHz, CDCl<sub>3</sub>)** δ 186.6, 166.2, 141.5, 132.5, 125.0, 121.9, 121.6, 121.2, 108.9, 101.8, 59.3, 35.5, 30.3, 27.8, 26.9, 25.4, 14.6, 11.5. **HRMS (ESI):** Calcd for C<sub>18</sub>H<sub>22</sub>N<sub>2</sub>O<sub>2</sub> [M+H]<sup>+</sup>: 299.1754; found: 299.1756.

#### 4. X-ray Crystallographic data of 4l

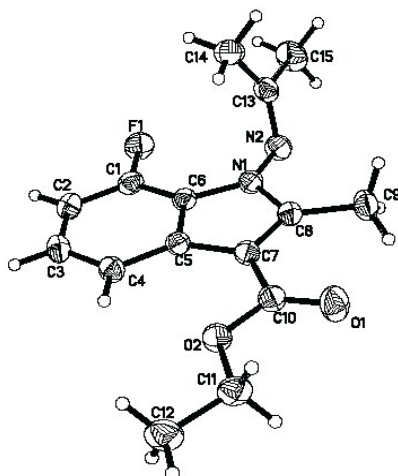

X-ray molecular structure of 4l

**Table 1** Crystal data and structure refinement for 4l.

|                                        |                                                                |
|----------------------------------------|----------------------------------------------------------------|
| Empirical formula                      | C <sub>15</sub> H <sub>17</sub> FN <sub>2</sub> O <sub>2</sub> |
| Formula weight                         | 276.30                                                         |
| Temperature/K                          | 293(2)                                                         |
| Crystal system                         | triclinic                                                      |
| Space group                            | P-1                                                            |
| a/Å                                    | 9.5214(8)                                                      |
| b/Å                                    | 9.6784(8)                                                      |
| c/Å                                    | 9.8861(8)                                                      |
| $\alpha$ /°                            | 114.205(8)                                                     |
| $\beta$ /°                             | 92.568(7)                                                      |
| $\gamma$ /°                            | 116.743(8)                                                     |
| Volume/Å <sup>3</sup>                  | 712.05(12)                                                     |
| Z                                      | 2                                                              |
| $\rho_{\text{calc}}/\text{cm}^3$       | 1.289                                                          |
| $\mu/\text{mm}^{-1}$                   | 0.790                                                          |
| F(000)                                 | 292.0                                                          |
| Crystal size/mm <sup>3</sup>           | 0.25 × 0.2 × 0.15                                              |
| Radiation                              | CuK $\alpha$ ( $\lambda$ = 1.54184)                            |
| 2 $\theta$ range for data collection/° | 10.224 to 134.144                                              |
| Index ranges                           | -11 ≤ h ≤ 11, -11 ≤ k ≤ 11, -8 ≤ l ≤ 11                        |
| Reflections collected                  | 4970                                                           |
| Independent reflections                | 2536 [R <sub>int</sub> = 0.0165, R <sub>sigma</sub> = 0.0230]  |

Data/restraints/parameters 2536/0/186  
 Goodness-of-fit on F<sup>2</sup> 1.042  
 Final R indexes [I>2σ(I)] R<sub>1</sub> = 0.0376, wR<sub>2</sub> = 0.1015  
 Final R indexes [all data] R<sub>1</sub> = 0.0440, wR<sub>2</sub> = 0.1075  
 Largest diff. peak/hole / e Å<sup>-3</sup> 0.18/-0.13

**Table 2 Fractional Atomic Coordinates (×10<sup>4</sup>) and Equivalent Isotropic Displacement Parameters (Å<sup>2</sup>×10<sup>3</sup>) for 4l. U<sub>eq</sub> is defined as 1/3 of the trace of the orthogonalised U<sub>ij</sub> tensor.**

| Atom            | x           | y          | z           | U(eq)   |
|-----------------|-------------|------------|-------------|---------|
| C <sub>1</sub>  | 10462.3(19) | 2007.8(19) | 3321.3(17)  | 46.5(4) |
| C <sub>2</sub>  | 12074(2)    | 2913(2)    | 4114.3(19)  | 54.0(4) |
| C <sub>3</sub>  | 12593.2(19) | 4126(2)    | 5684.6(19)  | 53.6(4) |
| C <sub>4</sub>  | 11523.9(18) | 4461(2)    | 6455.8(17)  | 47.0(4) |
| C <sub>5</sub>  | 9859.8(17)  | 3530.3(18) | 5647.3(16)  | 40.0(3) |
| C <sub>6</sub>  | 9345.1(17)  | 2284.6(18) | 4069.9(16)  | 40.7(3) |
| C <sub>7</sub>  | 8416.2(17)  | 3523.3(18) | 6035.6(16)  | 41.4(3) |
| C <sub>8</sub>  | 7119.1(17)  | 2313.8(19) | 4713.7(17)  | 43.8(3) |
| C <sub>9</sub>  | 5359.2(19)  | 1795(2)    | 4404(2)     | 59.6(4) |
| C <sub>10</sub> | 8292.2(18)  | 4604(2)    | 7518.8(17)  | 46.2(4) |
| C <sub>11</sub> | 9802(2)     | 6920(2)    | 10079.1(18) | 57.0(4) |
| C <sub>12</sub> | 11550(2)    | 8187(2)    | 10999(2)    | 70.0(5) |
| C <sub>13</sub> | 6370.4(18)  | -1196(2)   | 1460.6(18)  | 50.8(4) |
| C <sub>14</sub> | 6878(2)     | -1932(2)   | 2306(2)     | 63.1(5) |
| C <sub>15</sub> | 5368(3)     | -2431(3)   | -184(2)     | 79.1(6) |
| F <sub>1</sub>  | 9955.6(12)  | 847.1(13)  | 1787.7(10)  | 62.9(3) |
| N <sub>1</sub>  | 7666.6(14)  | 1540.5(15) | 3548.0(13)  | 44.1(3) |
| N <sub>2</sub>  | 6679.3(16)  | 391.6(17)  | 1993.8(14)  | 52.3(4) |
| O <sub>1</sub>  | 7043.5(15)  | 4504.8(18) | 7816.6(14)  | 69.5(4) |
| O <sub>2</sub>  | 9764.4(13)  | 5766.9(14) | 8559.8(11)  | 51.8(3) |

**Table 3 Anisotropic Displacement Parameters (Å<sup>2</sup>×10<sup>3</sup>) for 4l. The Anisotropic displacement factor exponent takes the form: -2π<sup>2</sup>[h<sup>2</sup>a<sup>\*2</sup>U<sub>11</sub>+2hka<sup>\*</sup>b<sup>\*</sup>U<sub>12</sub>+...].**

| Atom           | U <sub>11</sub> | U <sub>22</sub> | U <sub>33</sub> | U <sub>23</sub> | U <sub>13</sub> | U <sub>12</sub> |
|----------------|-----------------|-----------------|-----------------|-----------------|-----------------|-----------------|
| C <sub>1</sub> | 53.9(9)         | 44.3(8)         | 41.5(8)         | 15.6(7)         | 13.0(7)         | 30.0(7)         |
| C <sub>2</sub> | 50.2(9)         | 58.8(10)        | 61(1)           | 26.7(8)         | 21.2(8)         | 35.6(8)         |
| C <sub>3</sub> | 40.5(8)         | 58.3(9)         | 57.6(10)        | 24.8(8)         | 7.4(7)          | 25.5(7)         |
| C <sub>4</sub> | 43.0(8)         | 48.0(8)         | 40.5(8)         | 15.6(6)         | 4.1(6)          | 22.2(7)         |
| C <sub>5</sub> | 40.6(8)         | 38.3(7)         | 38.1(7)         | 16.2(6)         | 7.0(6)          | 20.5(6)         |

|                 |          |          |          |         |         |         |
|-----------------|----------|----------|----------|---------|---------|---------|
| C <sub>6</sub>  | 41.5(8)  | 37.8(7)  | 39.2(8)  | 14.9(6) | 6.2(6)  | 21.4(6) |
| C <sub>7</sub>  | 40.9(8)  | 41.1(7)  | 38.7(8)  | 16.4(6) | 9.3(6)  | 21.1(6) |
| C <sub>8</sub>  | 40.1(8)  | 43.3(8)  | 44.7(8)  | 18.4(6) | 9.1(6)  | 21.9(6) |
| C <sub>9</sub>  | 39.8(8)  | 65.8(10) | 62.1(10) | 24.1(9) | 8.2(7)  | 25.5(8) |
| C <sub>10</sub> | 45.2(8)  | 47.5(8)  | 43.5(8)  | 19.8(7) | 13.0(7) | 23.8(7) |
| C <sub>11</sub> | 68.2(11) | 55.5(9)  | 38.9(8)  | 13.0(7) | 15.4(8) | 34.2(9) |
| C <sub>12</sub> | 78.8(13) | 59.8(11) | 46.9(10) | 10.6(8) | 4.9(9)  | 32(1)   |
| C <sub>13</sub> | 41.6(8)  | 44.9(8)  | 47.1(9)  | 11.5(7) | 10.4(7) | 18.0(7) |
| C <sub>14</sub> | 64.7(11) | 49.4(9)  | 74.8(12) | 29.2(9) | 26.2(9) | 29.1(8) |
| C <sub>15</sub> | 66.6(12) | 65.0(12) | 53.2(11) | -1.5(9) | -0.5(9) | 23(1)   |
| F <sub>1</sub>  | 70.1(6)  | 62.2(6)  | 44.8(5)  | 10.8(4) | 17.0(5) | 38.6(5) |
| N <sub>1</sub>  | 41.6(7)  | 40.0(6)  | 38.2(6)  | 9.9(5)  | 1.6(5)  | 20.3(5) |
| N <sub>2</sub>  | 50.6(8)  | 49.4(7)  | 39.4(7)  | 11.1(6) | -2.0(6) | 23.2(6) |
| O <sub>1</sub>  | 51.4(7)  | 81.3(9)  | 57.9(7)  | 18.8(6) | 22.0(6) | 33.4(6) |
| O <sub>2</sub>  | 50.9(6)  | 53.1(6)  | 37.6(6)  | 9.9(5)  | 10.3(5) | 27.2(5) |

**Table 4 Bond Lengths for 4l.**

| Atom           | Atom            | Length/Å   | Atom            | Atom            | Length/Å   |
|----------------|-----------------|------------|-----------------|-----------------|------------|
| C <sub>1</sub> | C <sub>2</sub>  | 1.363(2)   | C <sub>8</sub>  | C <sub>9</sub>  | 1.492(2)   |
| C <sub>1</sub> | C <sub>6</sub>  | 1.384(2)   | C <sub>8</sub>  | N <sub>1</sub>  | 1.3629(19) |
| C <sub>1</sub> | F <sub>1</sub>  | 1.3578(17) | C <sub>10</sub> | O <sub>1</sub>  | 1.2089(18) |
| C <sub>2</sub> | C <sub>3</sub>  | 1.395(2)   | C <sub>10</sub> | O <sub>2</sub>  | 1.3387(18) |
| C <sub>3</sub> | C <sub>4</sub>  | 1.374(2)   | C <sub>11</sub> | C <sub>12</sub> | 1.488(3)   |
| C <sub>4</sub> | C <sub>5</sub>  | 1.4044(19) | C <sub>11</sub> | O <sub>2</sub>  | 1.4450(18) |
| C <sub>5</sub> | C <sub>6</sub>  | 1.4084(19) | C <sub>13</sub> | C <sub>14</sub> | 1.483(2)   |
| C <sub>5</sub> | C <sub>7</sub>  | 1.4415(19) | C <sub>13</sub> | C <sub>15</sub> | 1.492(2)   |
| C <sub>6</sub> | N <sub>1</sub>  | 1.3873(18) | C <sub>13</sub> | N <sub>2</sub>  | 1.281(2)   |
| C <sub>7</sub> | C <sub>8</sub>  | 1.380(2)   | N <sub>1</sub>  | N <sub>2</sub>  | 1.4176(16) |
| C <sub>7</sub> | C <sub>10</sub> | 1.458(2)   |                 |                 |            |

**Table 5 Bond Angles for 4l.**

| Atom           | Atom           | Atom           | Angle/°    | Atom           | Atom            | Atom           | Angle/°    |
|----------------|----------------|----------------|------------|----------------|-----------------|----------------|------------|
| C <sub>2</sub> | C <sub>1</sub> | C <sub>6</sub> | 120.21(14) | C <sub>7</sub> | C <sub>8</sub>  | C <sub>9</sub> | 131.54(14) |
| F <sub>1</sub> | C <sub>1</sub> | C <sub>2</sub> | 119.83(14) | N <sub>1</sub> | C <sub>8</sub>  | C <sub>7</sub> | 108.93(12) |
| F <sub>1</sub> | C <sub>1</sub> | C <sub>6</sub> | 119.95(13) | N <sub>1</sub> | C <sub>8</sub>  | C <sub>9</sub> | 119.53(13) |
| C <sub>1</sub> | C <sub>2</sub> | C <sub>3</sub> | 119.60(14) | O <sub>1</sub> | C <sub>10</sub> | C <sub>7</sub> | 126.04(15) |
| C <sub>4</sub> | C <sub>3</sub> | C <sub>2</sub> | 121.71(14) | O <sub>1</sub> | C <sub>10</sub> | O <sub>2</sub> | 122.43(14) |

|                |                |                 |            |                 |                 |                 |            |
|----------------|----------------|-----------------|------------|-----------------|-----------------|-----------------|------------|
| C <sub>3</sub> | C <sub>4</sub> | C <sub>5</sub>  | 119.01(14) | O <sub>2</sub>  | C <sub>10</sub> | C <sub>7</sub>  | 111.52(13) |
| C <sub>4</sub> | C <sub>5</sub> | C <sub>6</sub>  | 118.76(13) | O <sub>2</sub>  | C <sub>11</sub> | C <sub>12</sub> | 107.70(14) |
| C <sub>4</sub> | C <sub>5</sub> | C <sub>7</sub>  | 135.05(13) | C <sub>14</sub> | C <sub>13</sub> | C <sub>15</sub> | 117.17(15) |
| C <sub>6</sub> | C <sub>5</sub> | C <sub>7</sub>  | 106.19(12) | N <sub>2</sub>  | C <sub>13</sub> | C <sub>14</sub> | 127.11(15) |
| C <sub>1</sub> | C <sub>6</sub> | C <sub>5</sub>  | 120.68(13) | N <sub>2</sub>  | C <sub>13</sub> | C <sub>15</sub> | 115.72(16) |
| C <sub>1</sub> | C <sub>6</sub> | N <sub>1</sub>  | 131.68(13) | C <sub>6</sub>  | N <sub>1</sub>  | N <sub>2</sub>  | 126.54(12) |
| N <sub>1</sub> | C <sub>6</sub> | C <sub>5</sub>  | 107.63(12) | C <sub>8</sub>  | N <sub>1</sub>  | C <sub>6</sub>  | 109.71(12) |
| C <sub>5</sub> | C <sub>7</sub> | C <sub>10</sub> | 128.07(13) | C <sub>8</sub>  | N <sub>1</sub>  | N <sub>2</sub>  | 122.83(12) |
| C <sub>8</sub> | C <sub>7</sub> | C <sub>5</sub>  | 107.48(12) | C <sub>13</sub> | N <sub>2</sub>  | N <sub>1</sub>  | 114.29(13) |
| C <sub>8</sub> | C <sub>7</sub> | C <sub>10</sub> | 124.43(13) | C <sub>10</sub> | O <sub>2</sub>  | C <sub>11</sub> | 116.73(12) |

**Table 6 Torsion Angles for 4l.**

| A              | B              | C               | D               | Angle/°     | A               | B               | C               | D               | Angle/°     |
|----------------|----------------|-----------------|-----------------|-------------|-----------------|-----------------|-----------------|-----------------|-------------|
| C <sub>1</sub> | C <sub>2</sub> | C <sub>3</sub>  | C <sub>4</sub>  | -1.2(3)     | C <sub>6</sub>  | N <sub>1</sub>  | N <sub>2</sub>  | C <sub>13</sub> | 76.11(19)   |
| C <sub>1</sub> | C <sub>6</sub> | N <sub>1</sub>  | C <sub>8</sub>  | -176.95(15) | C <sub>7</sub>  | C <sub>5</sub>  | C <sub>6</sub>  | C <sub>1</sub>  | 178.15(13)  |
| C <sub>1</sub> | C <sub>6</sub> | N <sub>1</sub>  | N <sub>2</sub>  | -7.7(2)     | C <sub>7</sub>  | C <sub>5</sub>  | C <sub>6</sub>  | N <sub>1</sub>  | -1.20(15)   |
| C <sub>2</sub> | C <sub>1</sub> | C <sub>6</sub>  | C <sub>5</sub>  | 1.5(2)      | C <sub>7</sub>  | C <sub>8</sub>  | N <sub>1</sub>  | C <sub>6</sub>  | -2.52(16)   |
| C <sub>2</sub> | C <sub>1</sub> | C <sub>6</sub>  | N <sub>1</sub>  | -179.35(15) | C <sub>7</sub>  | C <sub>8</sub>  | N <sub>1</sub>  | N <sub>2</sub>  | -172.23(12) |
| C <sub>2</sub> | C <sub>3</sub> | C <sub>4</sub>  | C <sub>5</sub>  | 1.4(2)      | C <sub>7</sub>  | C <sub>10</sub> | O <sub>2</sub>  | C <sub>11</sub> | 179.83(13)  |
| C <sub>3</sub> | C <sub>4</sub> | C <sub>5</sub>  | C <sub>6</sub>  | -0.1(2)     | C <sub>8</sub>  | C <sub>7</sub>  | C <sub>10</sub> | O <sub>1</sub>  | 5.3(3)      |
| C <sub>3</sub> | C <sub>4</sub> | C <sub>5</sub>  | C <sub>7</sub>  | -179.36(15) | C <sub>8</sub>  | C <sub>7</sub>  | C <sub>10</sub> | O <sub>2</sub>  | -174.56(13) |
| C <sub>4</sub> | C <sub>5</sub> | C <sub>6</sub>  | C <sub>1</sub>  | -1.3(2)     | C <sub>8</sub>  | N <sub>1</sub>  | N <sub>2</sub>  | C <sub>13</sub> | -115.97(16) |
| C <sub>4</sub> | C <sub>5</sub> | C <sub>6</sub>  | N <sub>1</sub>  | 179.34(12)  | C <sub>9</sub>  | C <sub>8</sub>  | N <sub>1</sub>  | C <sub>6</sub>  | 176.79(13)  |
| C <sub>4</sub> | C <sub>5</sub> | C <sub>7</sub>  | C <sub>8</sub>  | 179.04(15)  | C <sub>9</sub>  | C <sub>8</sub>  | N <sub>1</sub>  | N <sub>2</sub>  | 7.1(2)      |
| C <sub>4</sub> | C <sub>5</sub> | C <sub>7</sub>  | C <sub>10</sub> | 0.7(3)      | C <sub>10</sub> | C <sub>7</sub>  | C <sub>8</sub>  | C <sub>9</sub>  | 0.9(3)      |
| C <sub>5</sub> | C <sub>6</sub> | N <sub>1</sub>  | C <sub>8</sub>  | 2.31(16)    | C <sub>10</sub> | C <sub>7</sub>  | C <sub>8</sub>  | N <sub>1</sub>  | -179.88(13) |
| C <sub>5</sub> | C <sub>6</sub> | N <sub>1</sub>  | N <sub>2</sub>  | 171.55(12)  | C <sub>12</sub> | C <sub>11</sub> | O <sub>2</sub>  | C <sub>10</sub> | -175.49(13) |
| C <sub>5</sub> | C <sub>7</sub> | C <sub>8</sub>  | C <sub>9</sub>  | -177.50(16) | C <sub>14</sub> | C <sub>13</sub> | N <sub>2</sub>  | N <sub>1</sub>  | 2.5(2)      |
| C <sub>5</sub> | C <sub>7</sub> | C <sub>8</sub>  | N <sub>1</sub>  | 1.70(16)    | C <sub>15</sub> | C <sub>13</sub> | N <sub>2</sub>  | N <sub>1</sub>  | -178.58(14) |
| C <sub>5</sub> | C <sub>7</sub> | C <sub>10</sub> | O <sub>1</sub>  | -176.60(15) | F <sub>1</sub>  | C <sub>1</sub>  | C <sub>2</sub>  | C <sub>3</sub>  | 178.95(14)  |
| C <sub>5</sub> | C <sub>7</sub> | C <sub>10</sub> | O <sub>2</sub>  | 3.5(2)      | F <sub>1</sub>  | C <sub>1</sub>  | C <sub>6</sub>  | C <sub>5</sub>  | -177.70(12) |
| C <sub>6</sub> | C <sub>1</sub> | C <sub>2</sub>  | C <sub>3</sub>  | -0.2(2)     | F <sub>1</sub>  | C <sub>1</sub>  | C <sub>6</sub>  | N <sub>1</sub>  | 1.5(2)      |
| C <sub>6</sub> | C <sub>5</sub> | C <sub>7</sub>  | C <sub>8</sub>  | -0.28(15)   | O <sub>1</sub>  | C <sub>10</sub> | O <sub>2</sub>  | C <sub>11</sub> | -0.1(2)     |
| C <sub>6</sub> | C <sub>5</sub> | C <sub>7</sub>  | C <sub>10</sub> | -178.62(14) |                 |                 |                 |                 |             |



**Table 7 Hydrogen Atom Coordinates ( $\text{\AA}\times 10^4$ ) and Isotropic Displacement Parameters ( $\text{\AA}^2\times 10^3$ ) for 4l.**

| Atom             | x     | y     | z     | U(eq) |
|------------------|-------|-------|-------|-------|
| H <sub>2</sub>   | 12824 | 2724  | 3612  | 65    |
| H <sub>3</sub>   | 13691 | 4723  | 6223  | 64    |
| H <sub>4</sub>   | 11896 | 5292  | 7498  | 56    |
| H <sub>9A</sub>  | 5019  | 1763  | 3457  | 89    |
| H <sub>9B</sub>  | 5221  | 2641  | 5239  | 89    |
| H <sub>9C</sub>  | 4705  | 648   | 4316  | 89    |
| H <sub>11A</sub> | 9223  | 6237  | 10573 | 68    |
| H <sub>11B</sub> | 9277  | 7553  | 10001 | 68    |
| H <sub>12A</sub> | 12099 | 8896  | 10528 | 105   |
| H <sub>12B</sub> | 12069 | 7546  | 11032 | 105   |
| H <sub>12C</sub> | 11610 | 8937  | 12032 | 105   |
| H <sub>14A</sub> | 7643  | -2244 | 1878  | 95    |
| H <sub>14B</sub> | 5932  | -2964 | 2209  | 95    |
| H <sub>14C</sub> | 7387  | -1063 | 3378  | 95    |
| H <sub>15A</sub> | 5029  | -1837 | -576  | 119   |
| H <sub>15B</sub> | 4418  | -3438 | -249  | 119   |
| H <sub>15C</sub> | 6010  | -2813 | -787  | 119   |

**5. Reference:**

1. Koduri, N. D.; Scott, H.; Hileman, B.; Cox, J. D.; Coffin, M.; Glicksberg, L.; Hussaini, S. R., *Org. Lett.* **2012**, 14, 440.
2. Zhang, P.; Zhang, Y.; Xue, X.; Wang, C.; Wang, Z.; Huang, L. *Anal. Biochem.* **2011**, 418, 1.

## 6. NMR Spectra of compounds 4

### $^1\text{H}$ , $^{13}\text{C}$ spectra of 4a

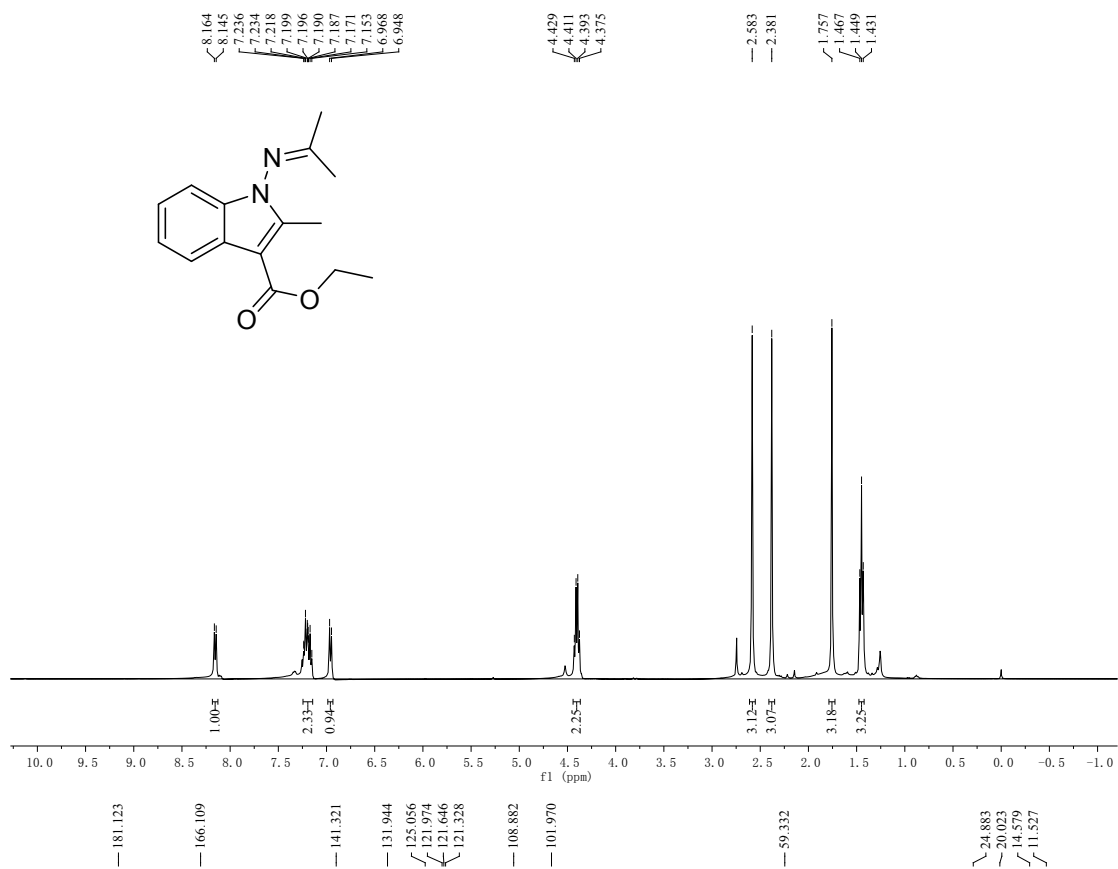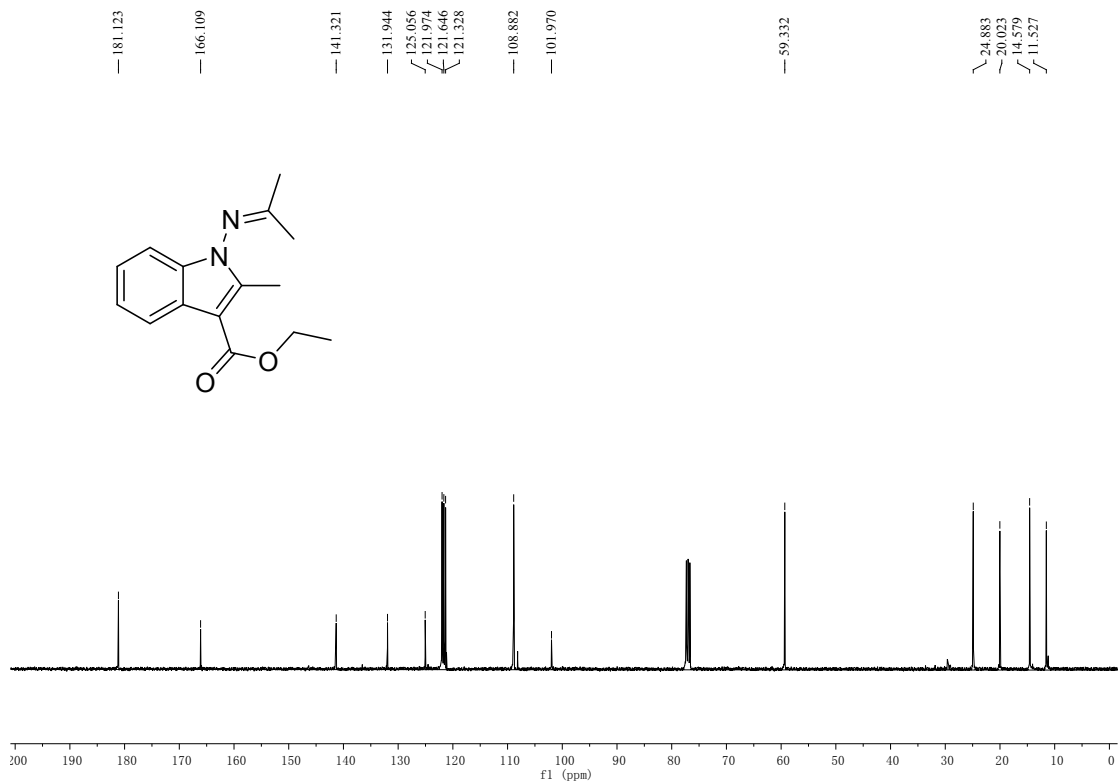

<sup>1</sup>H, <sup>13</sup>C, <sup>19</sup>F spectra of 4b

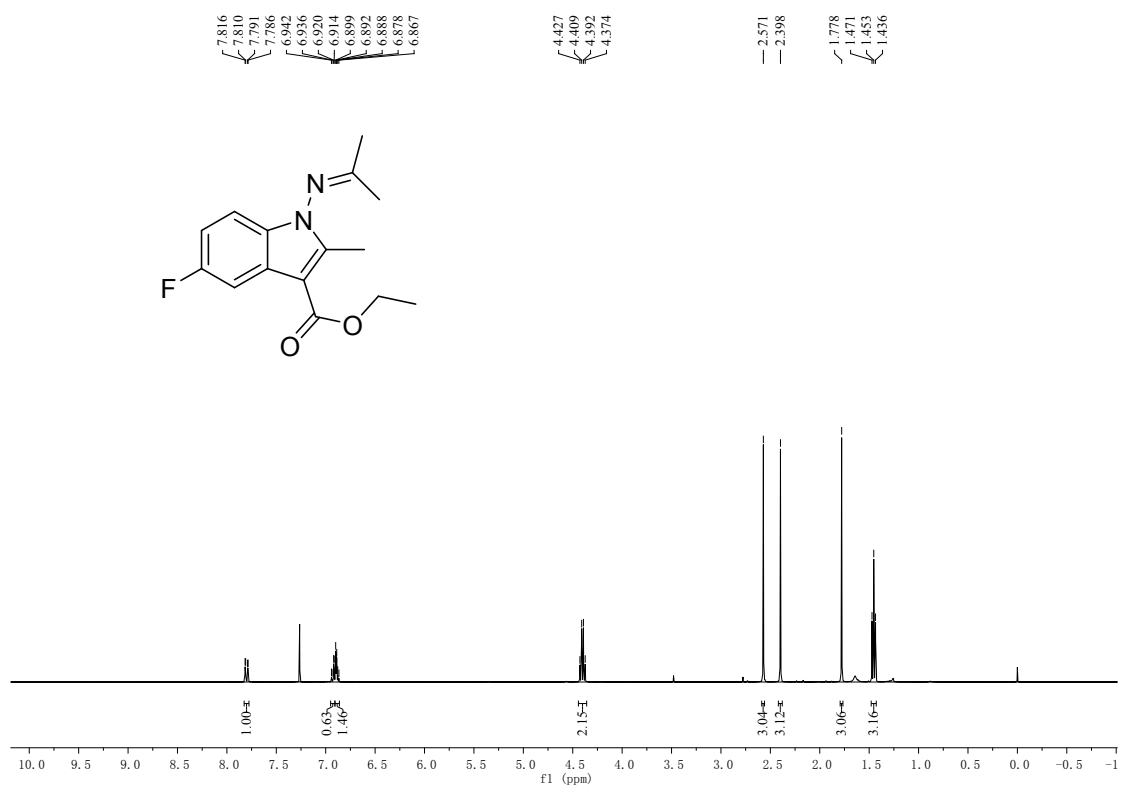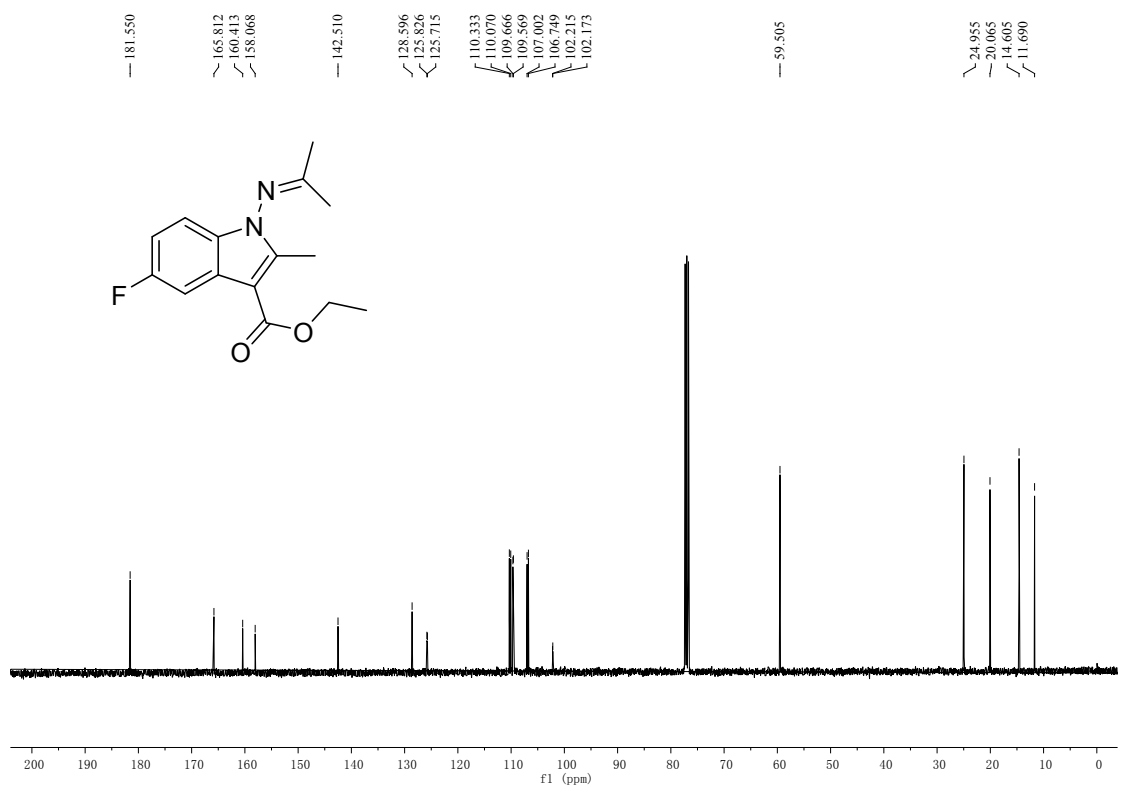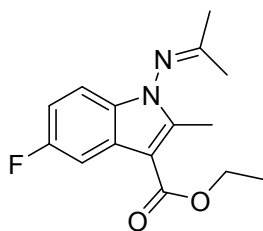

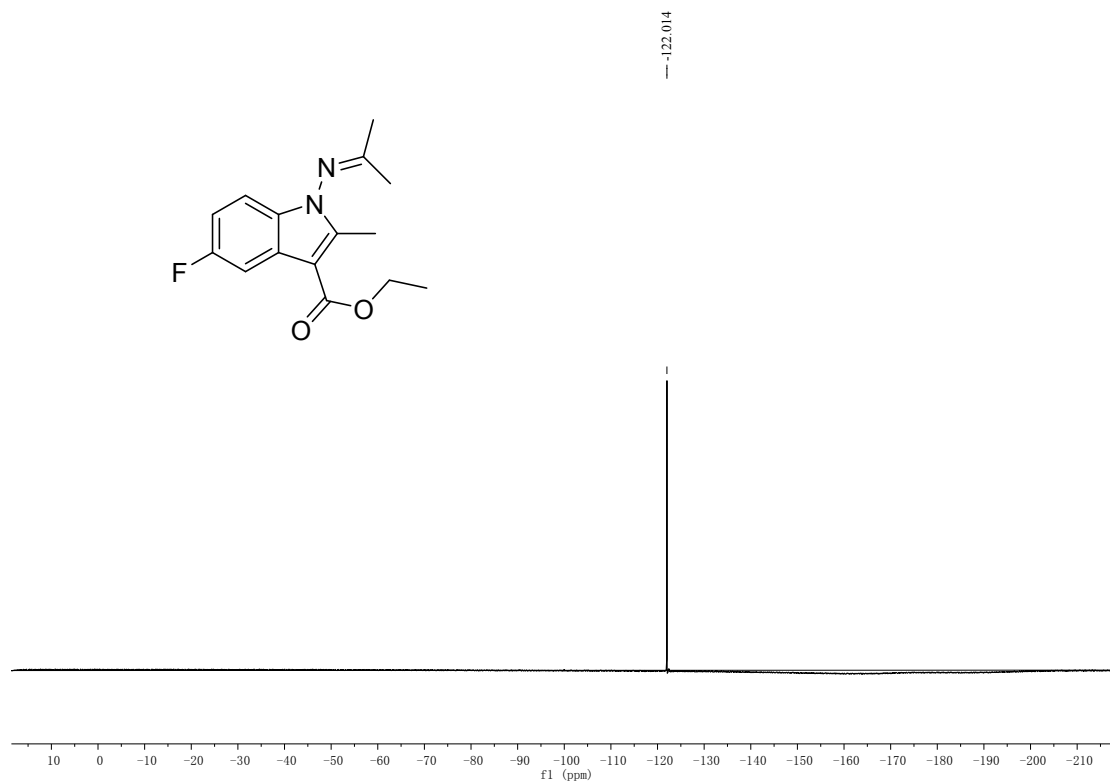

$^1\text{H}$ ,  $^{13}\text{C}$ , spectra of 4c

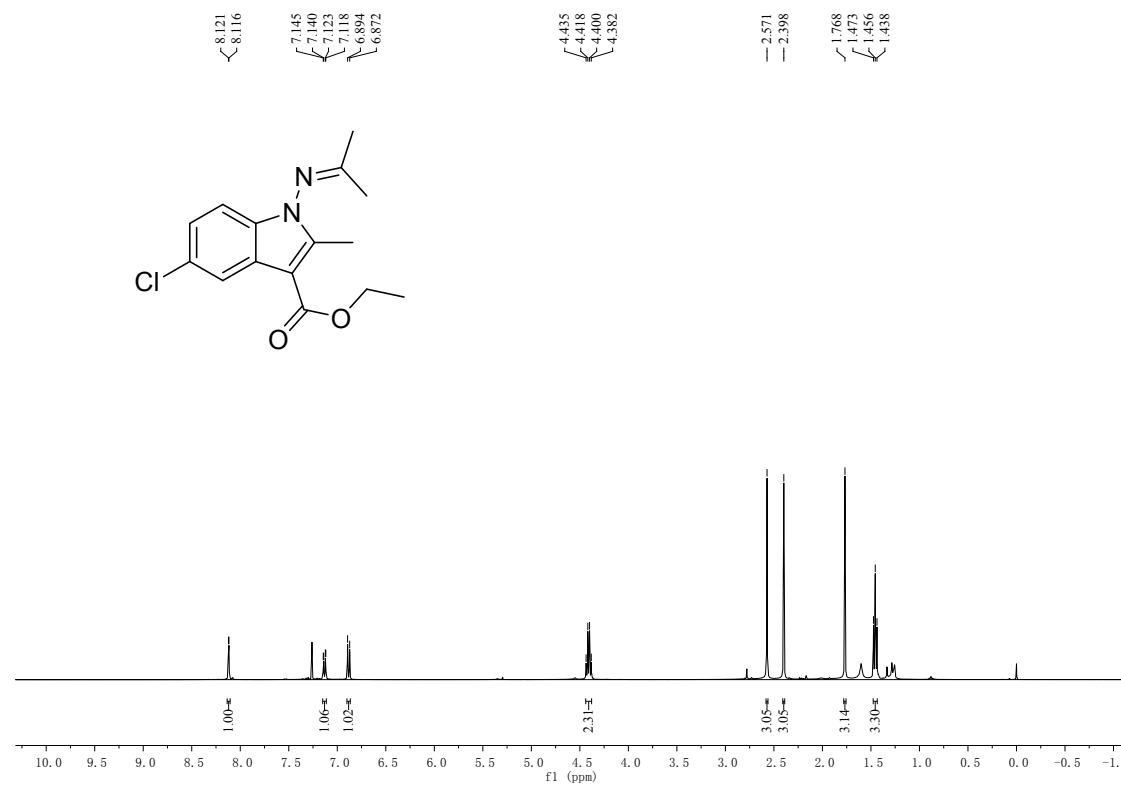

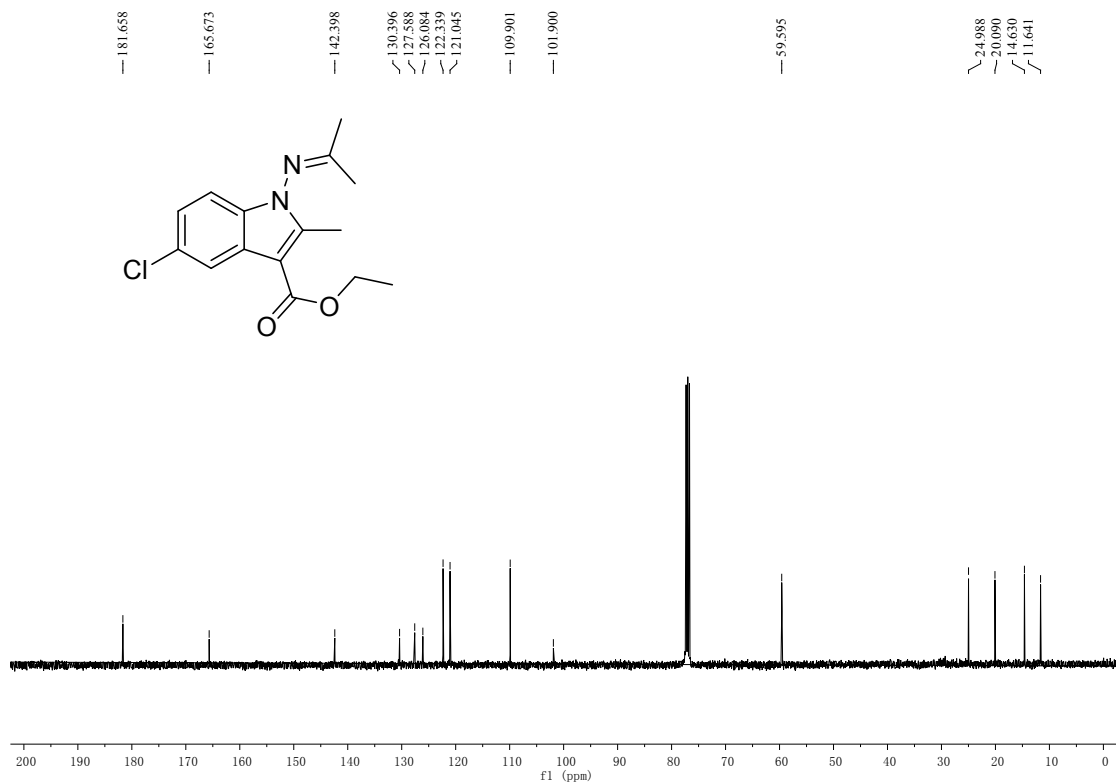

<sup>1</sup>H, <sup>13</sup>C spectra of 4d

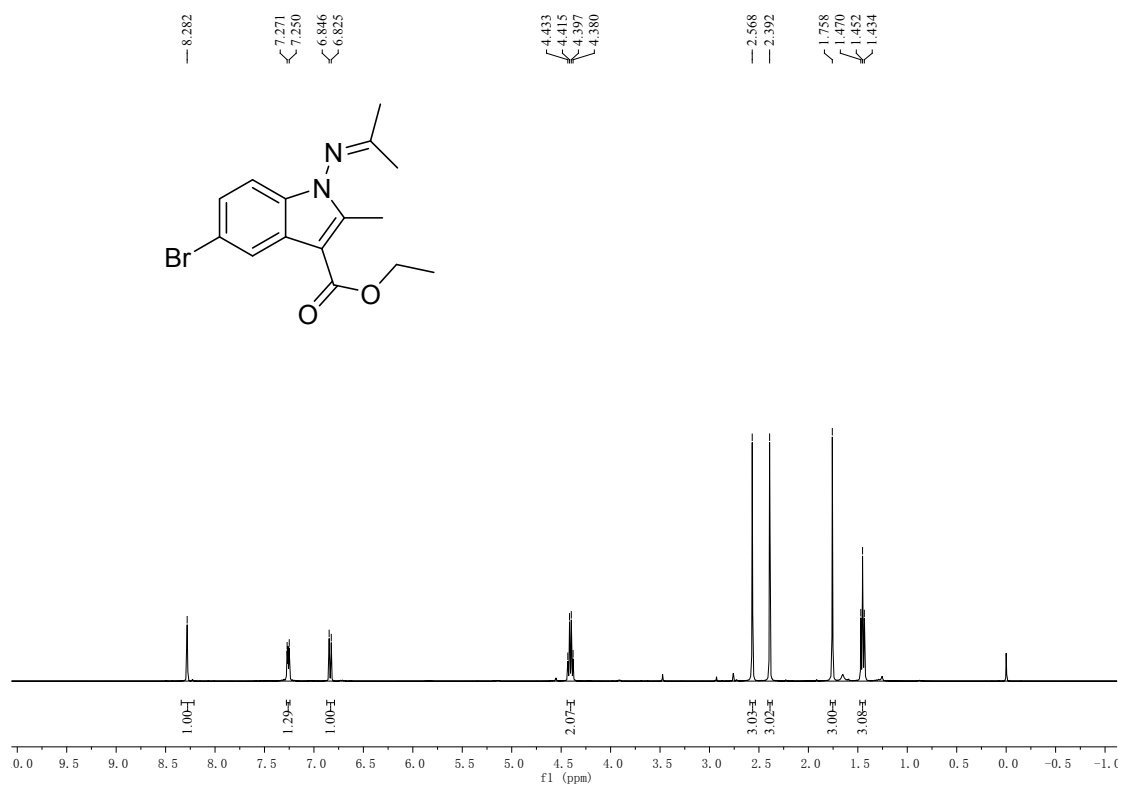

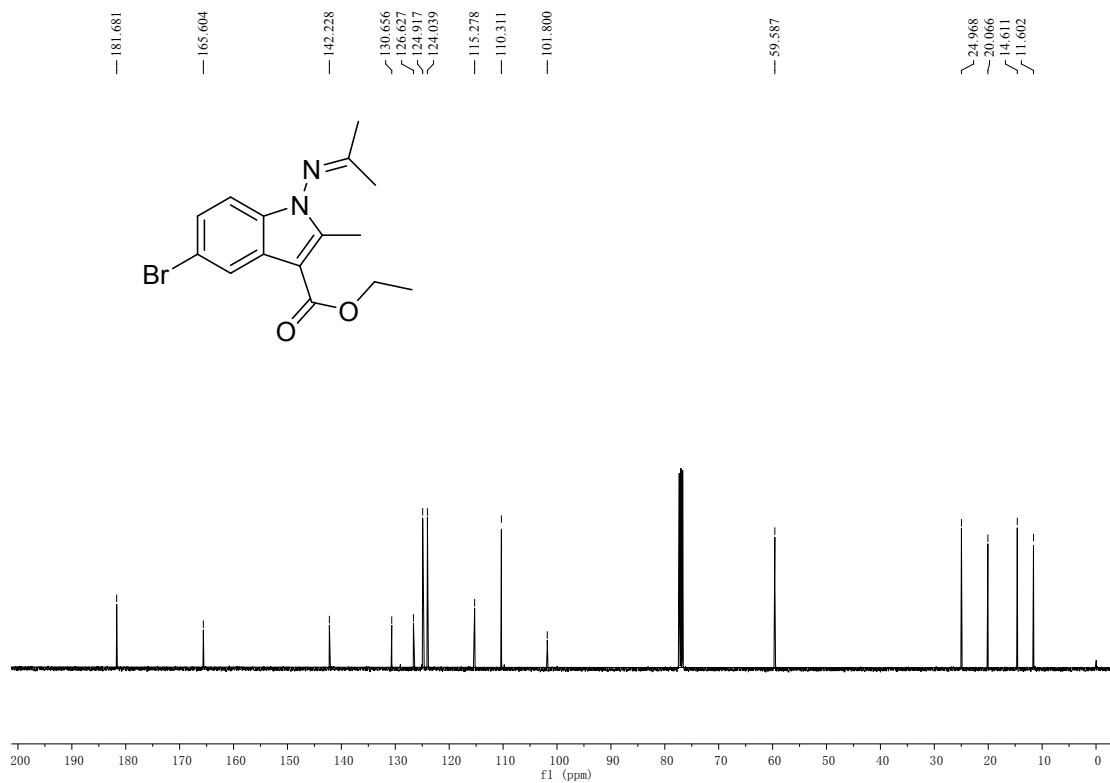

<sup>1</sup>H, <sup>13</sup>C spectra of 4e

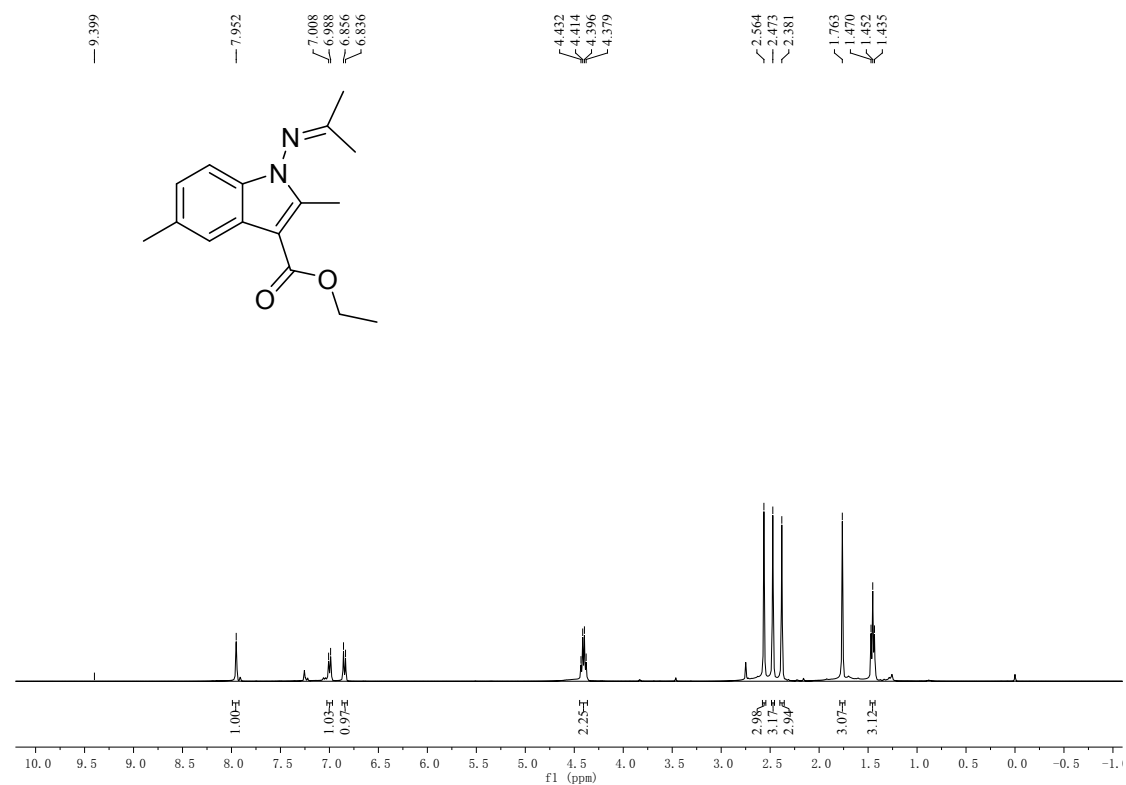

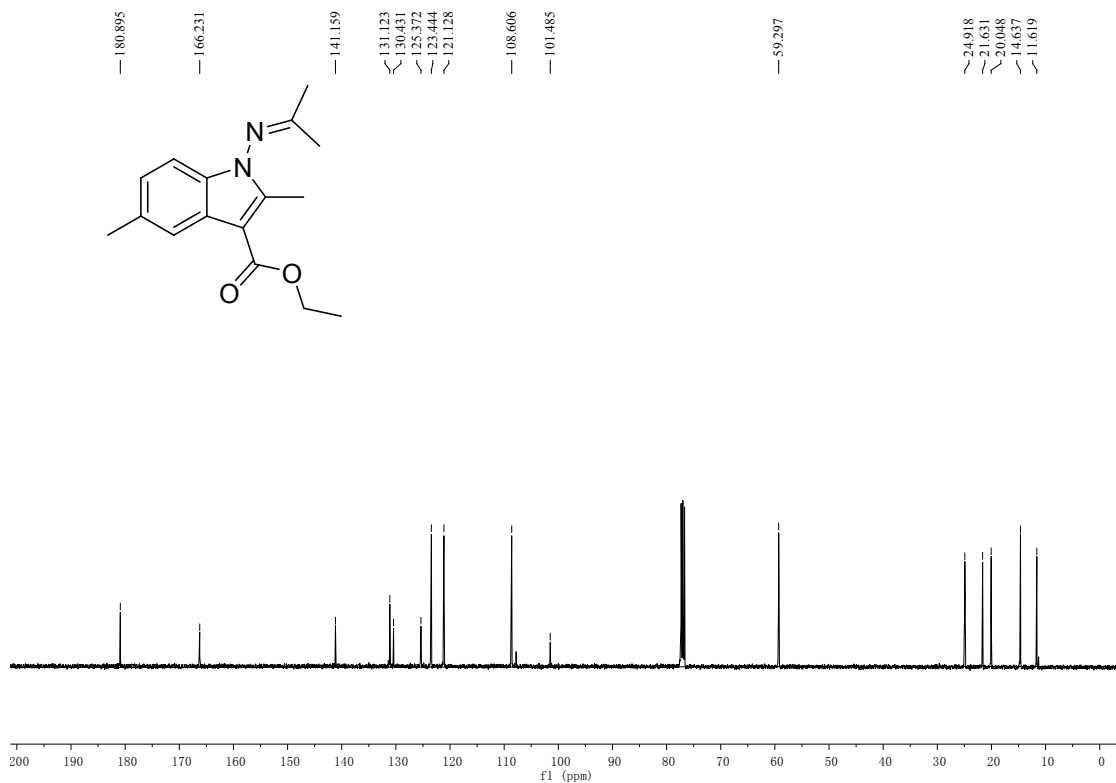

**<sup>1</sup>H, <sup>13</sup>C spectra of 4f**

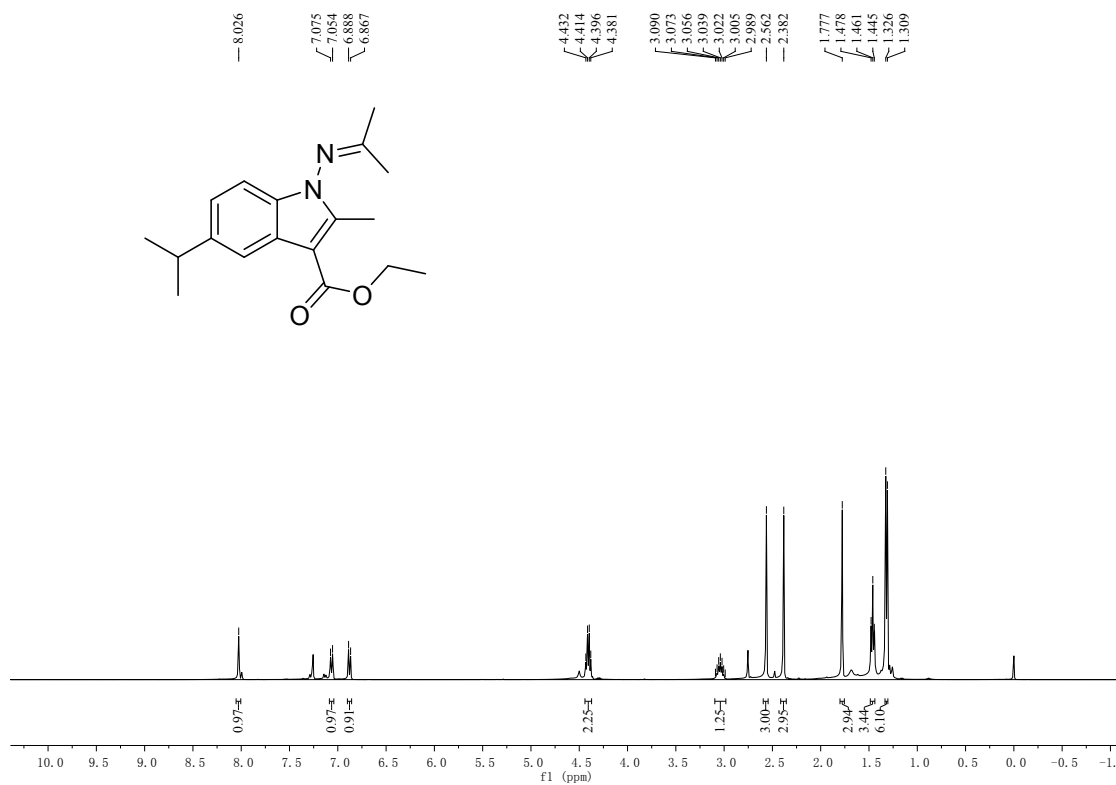

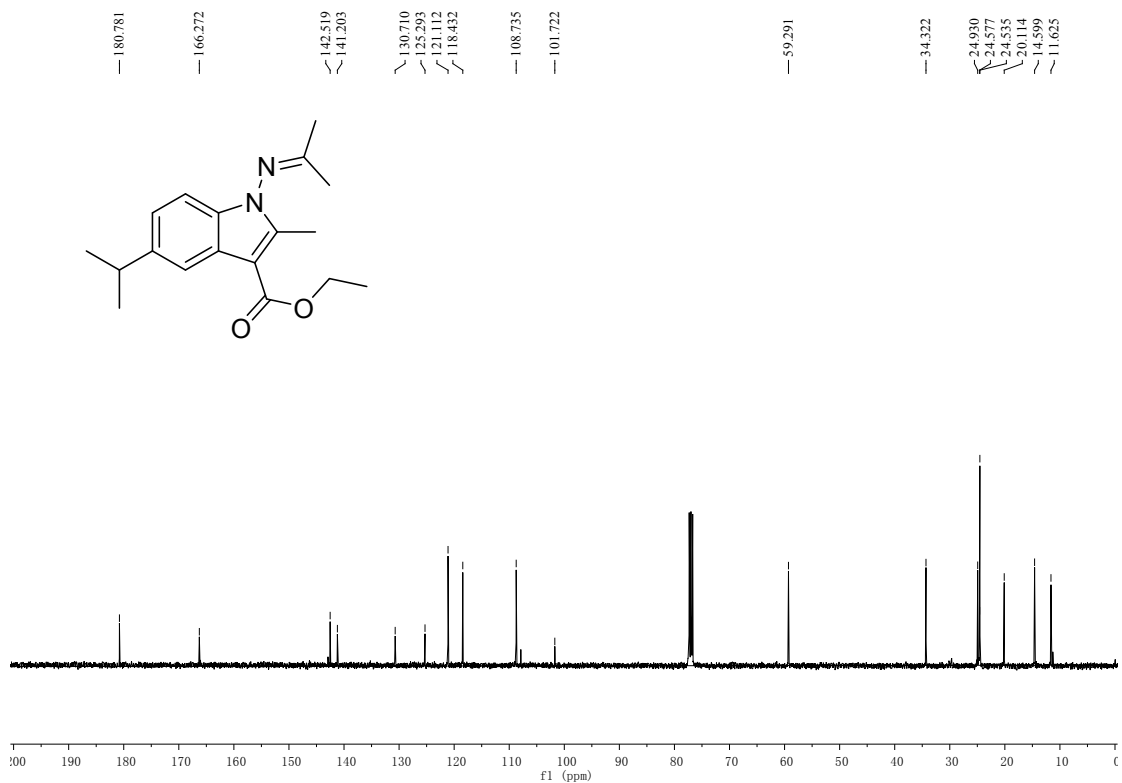

<sup>1</sup>H, <sup>13</sup>C spectra of 4g

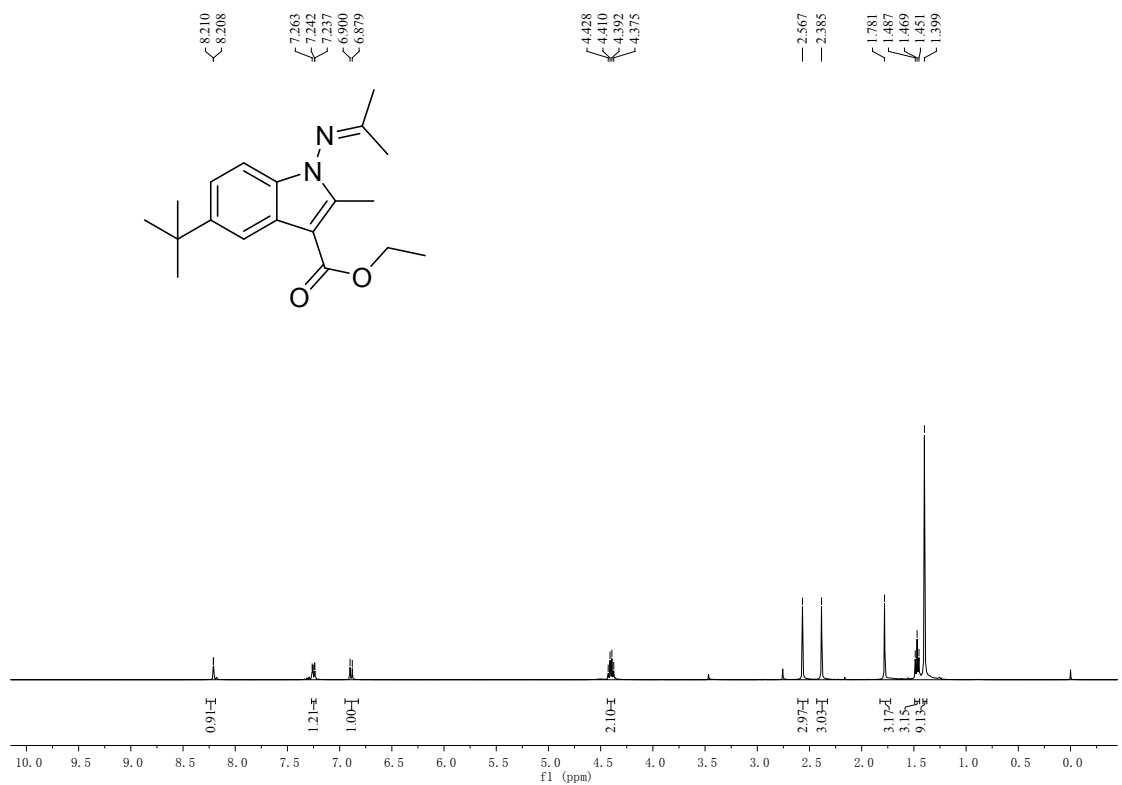



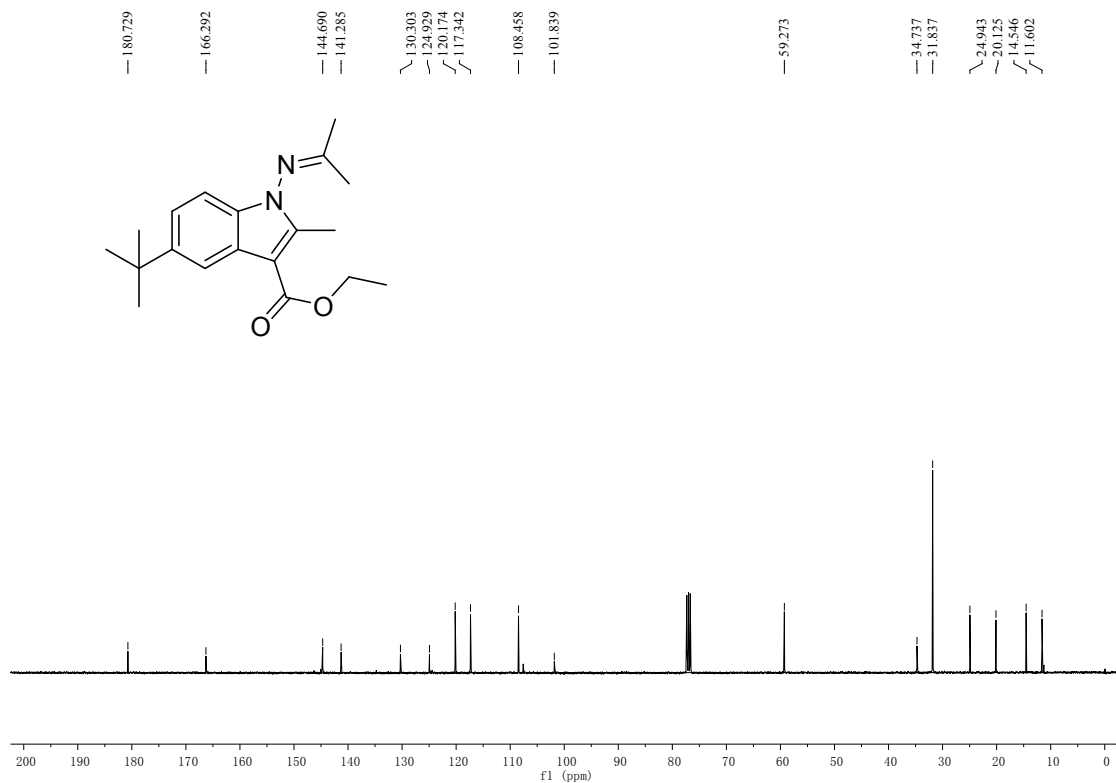

<sup>1</sup>H, <sup>13</sup>C spectra of 4h

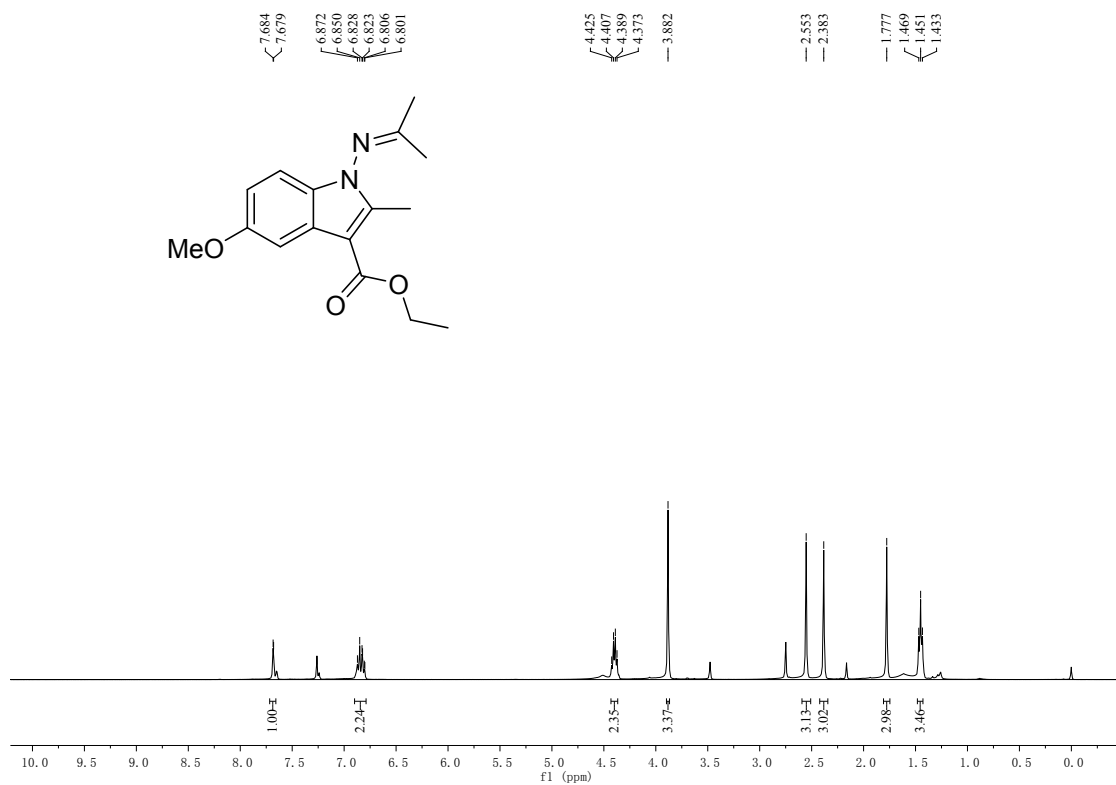

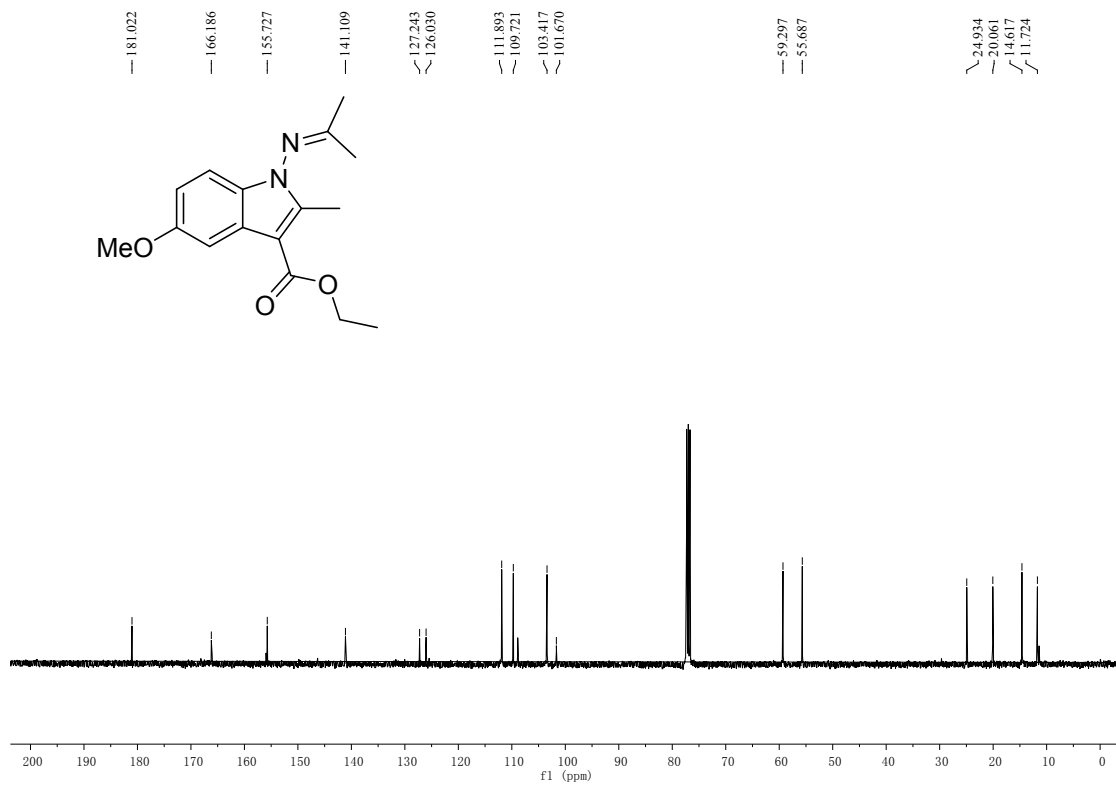

<sup>1</sup>H, <sup>13</sup>C spectra of 4i

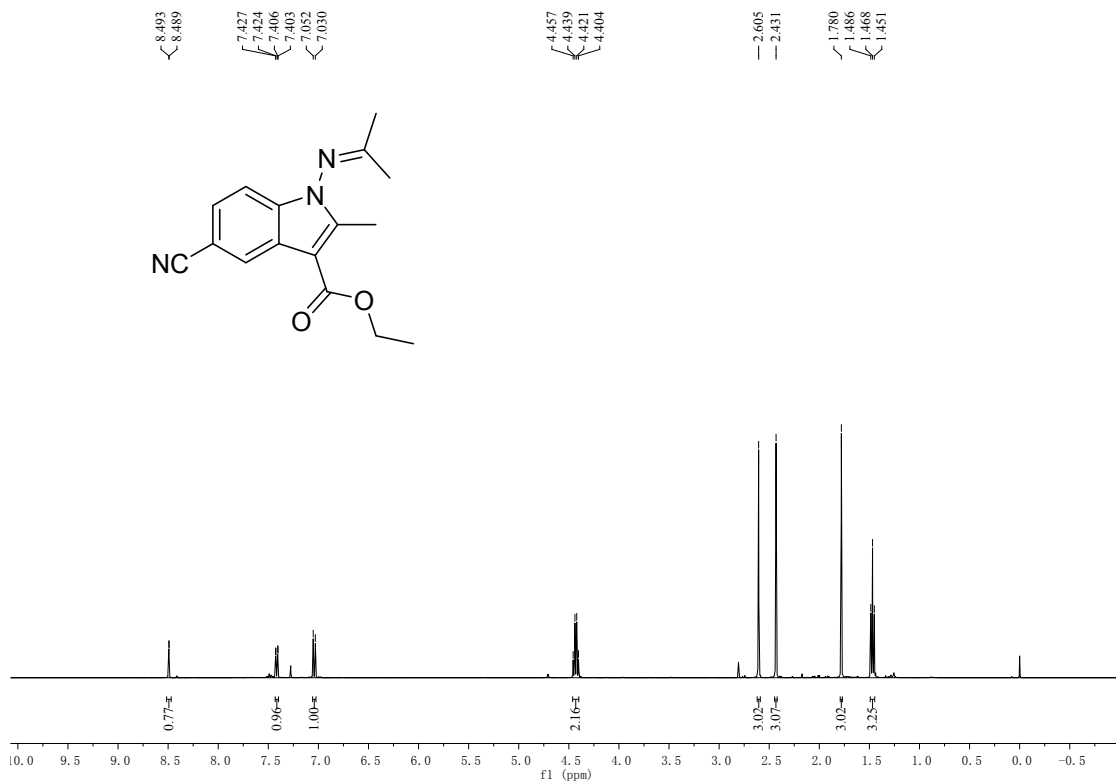

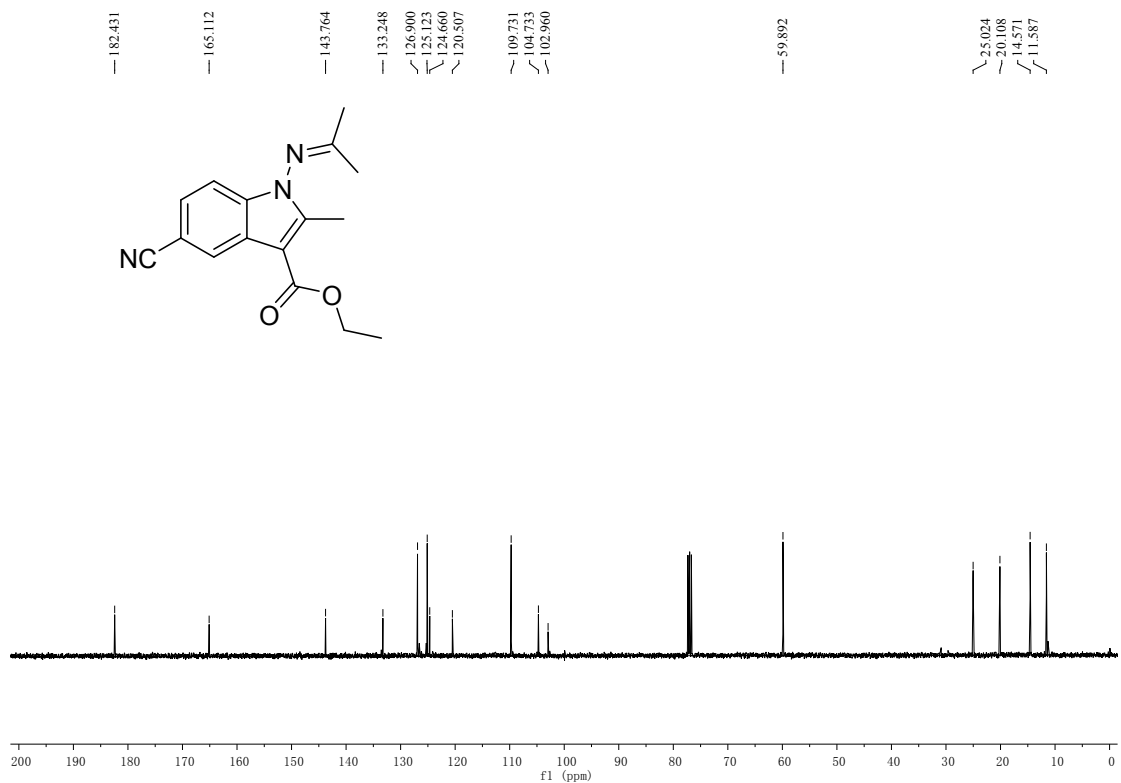

**<sup>1</sup>H, <sup>13</sup>C, <sup>19</sup>F spectra of 4j**

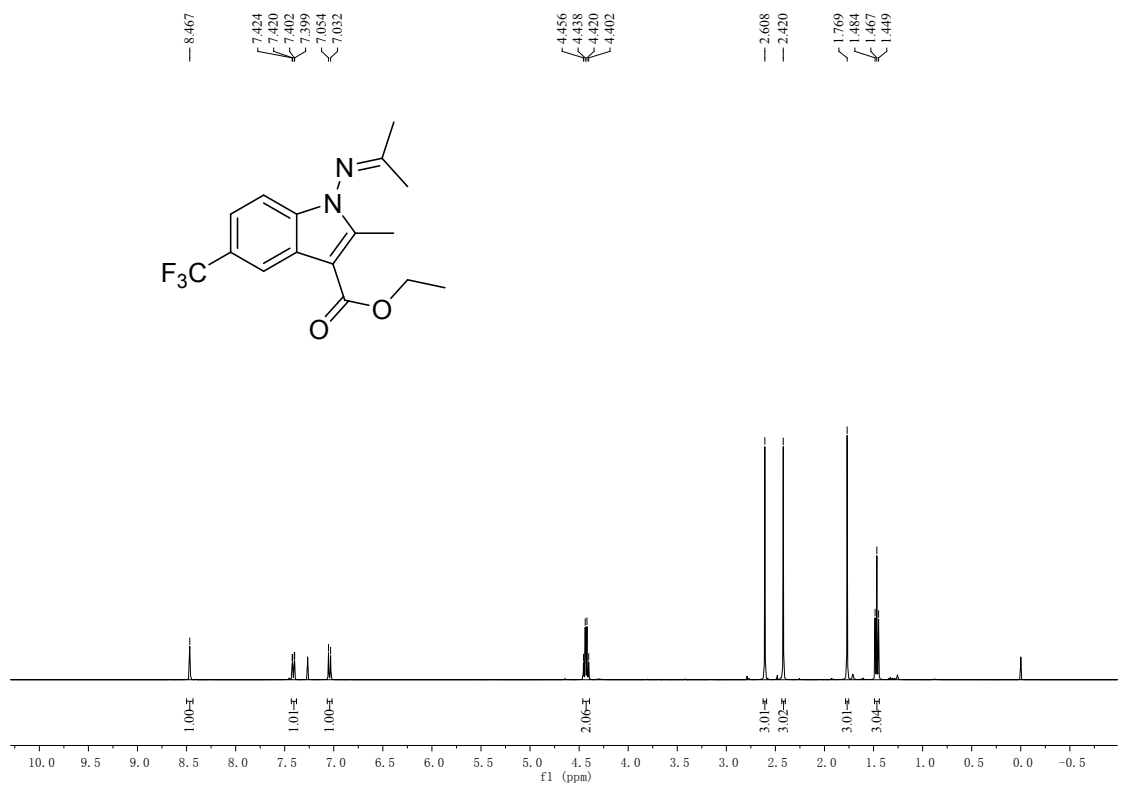

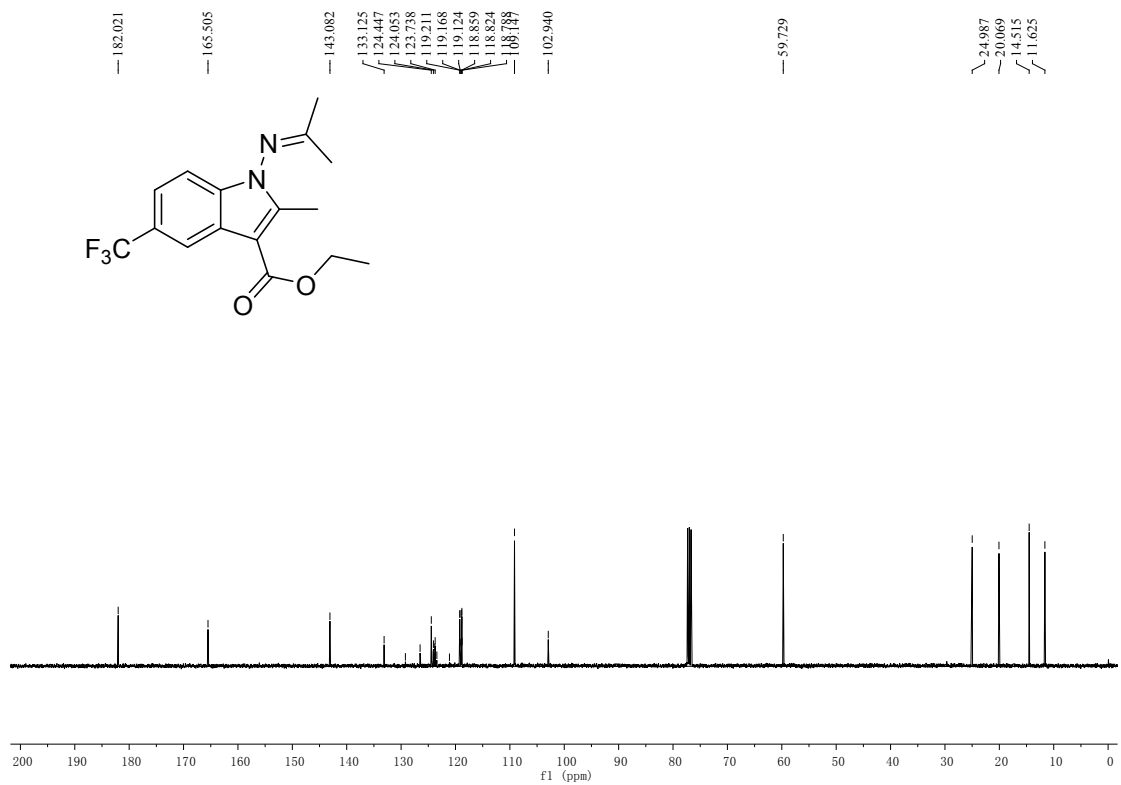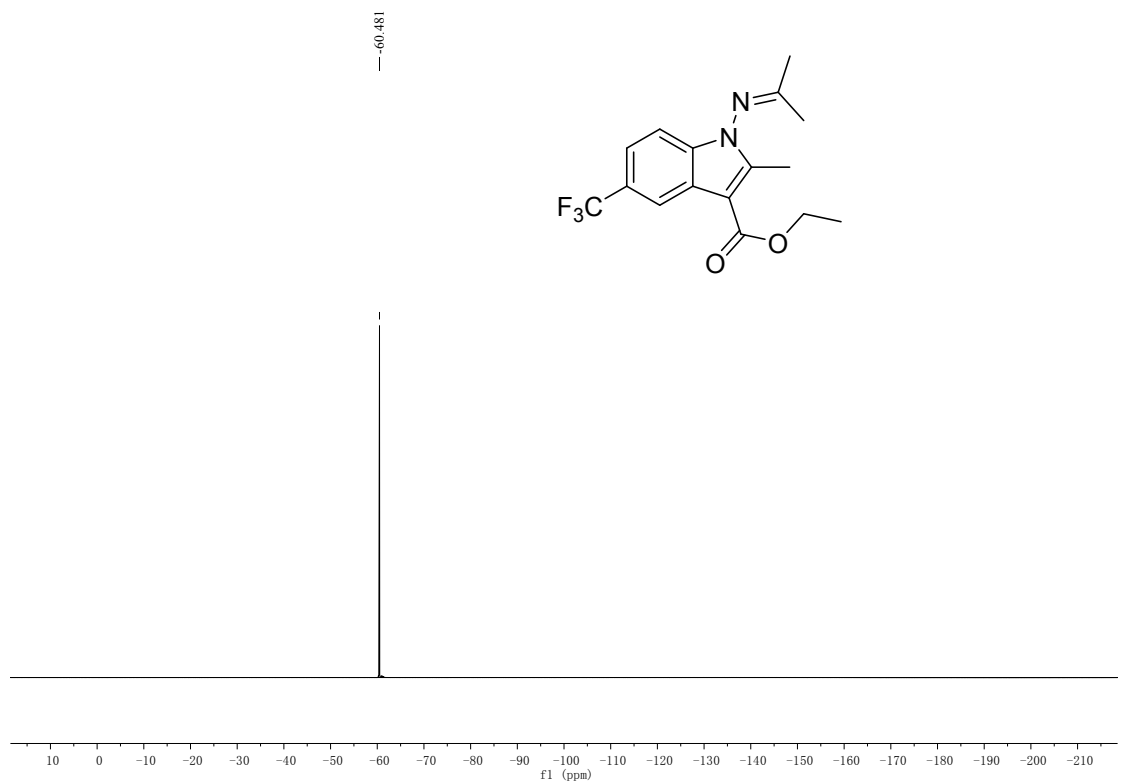

<sup>1</sup>H, <sup>13</sup>C spectra of 4k

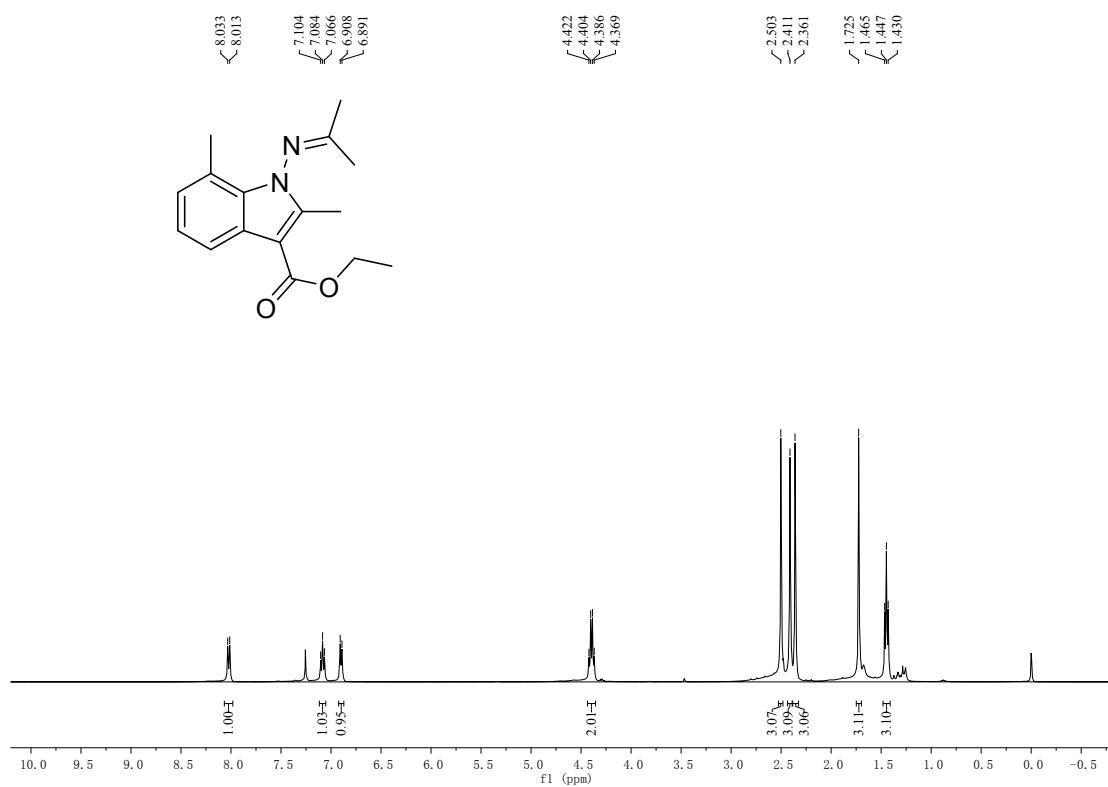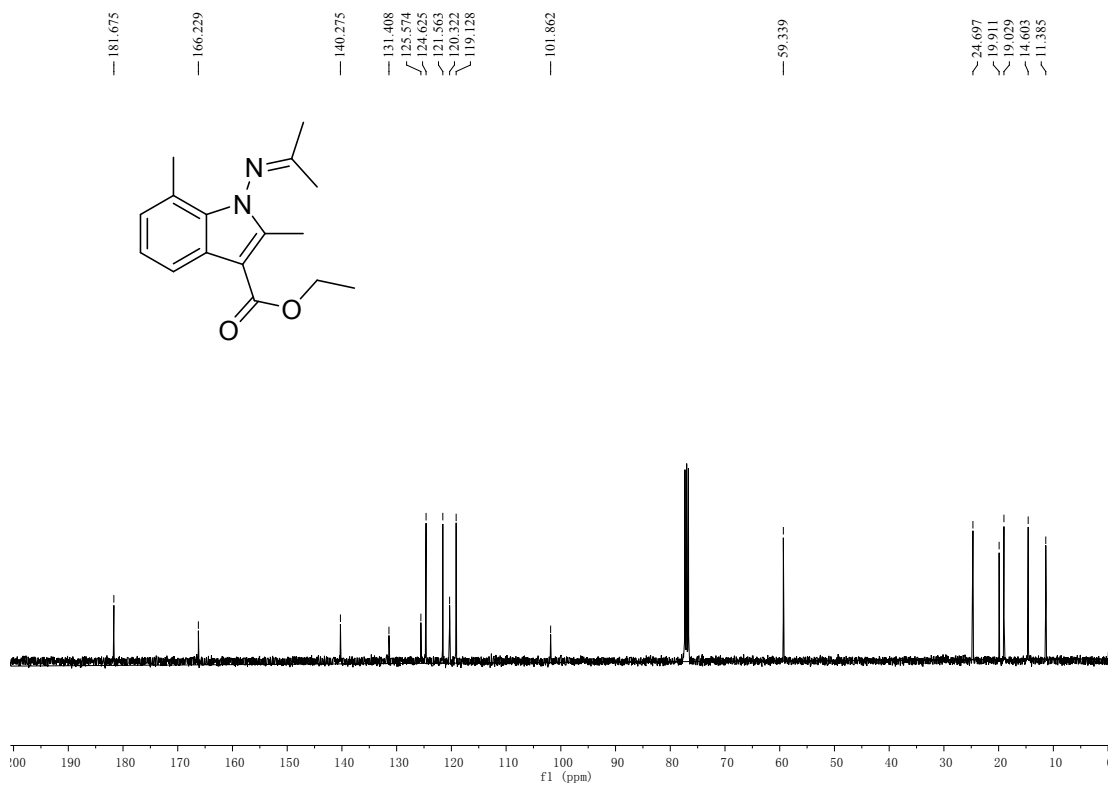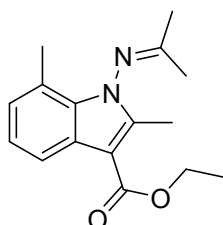

**<sup>1</sup>H, <sup>13</sup>C, <sup>19</sup>F spectra of 4l**

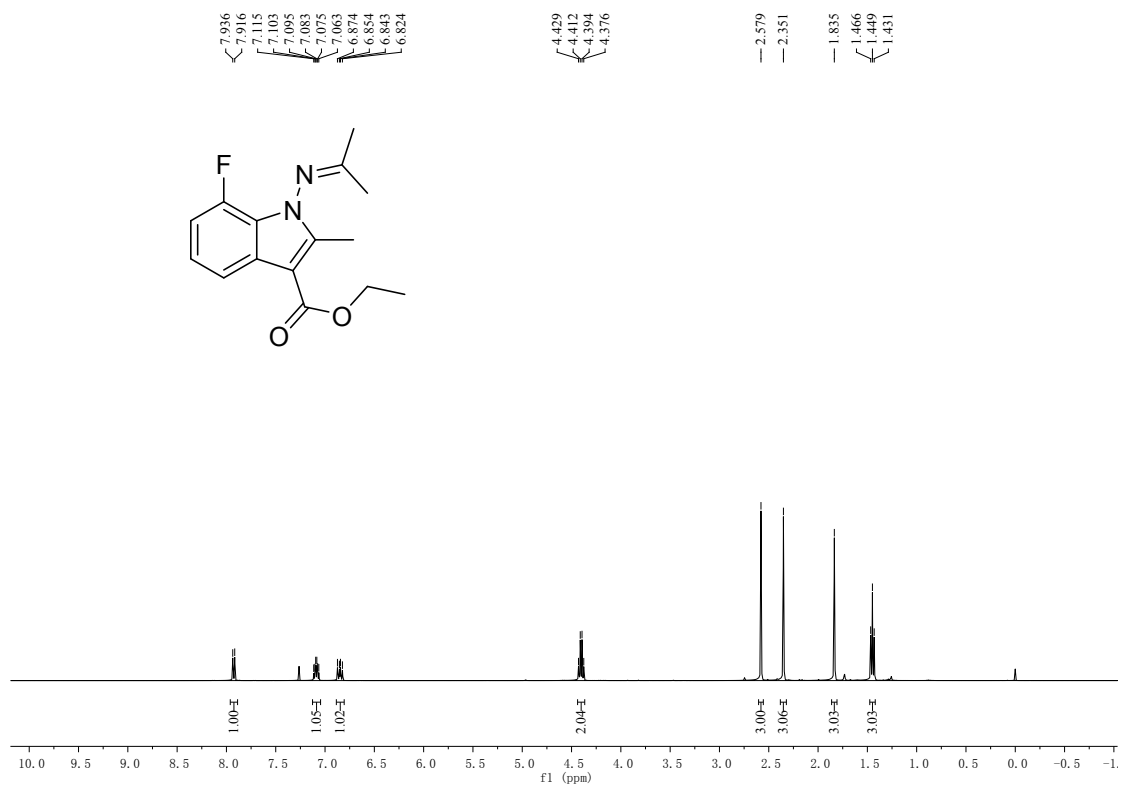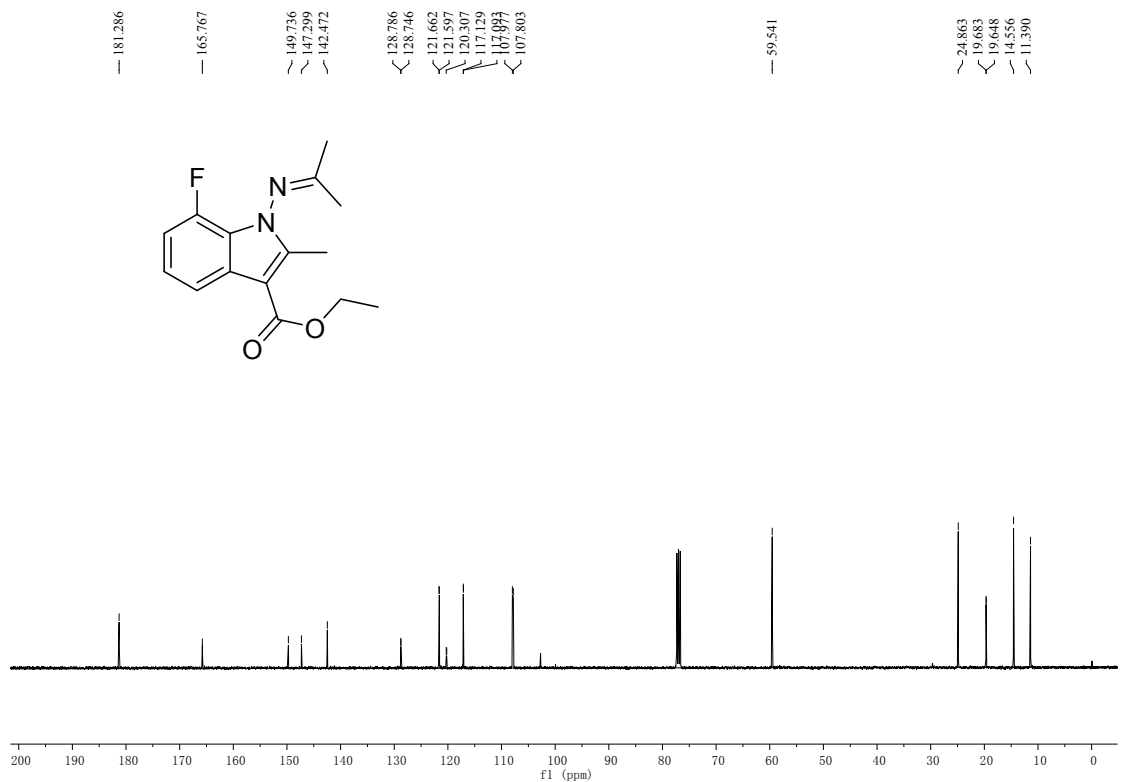

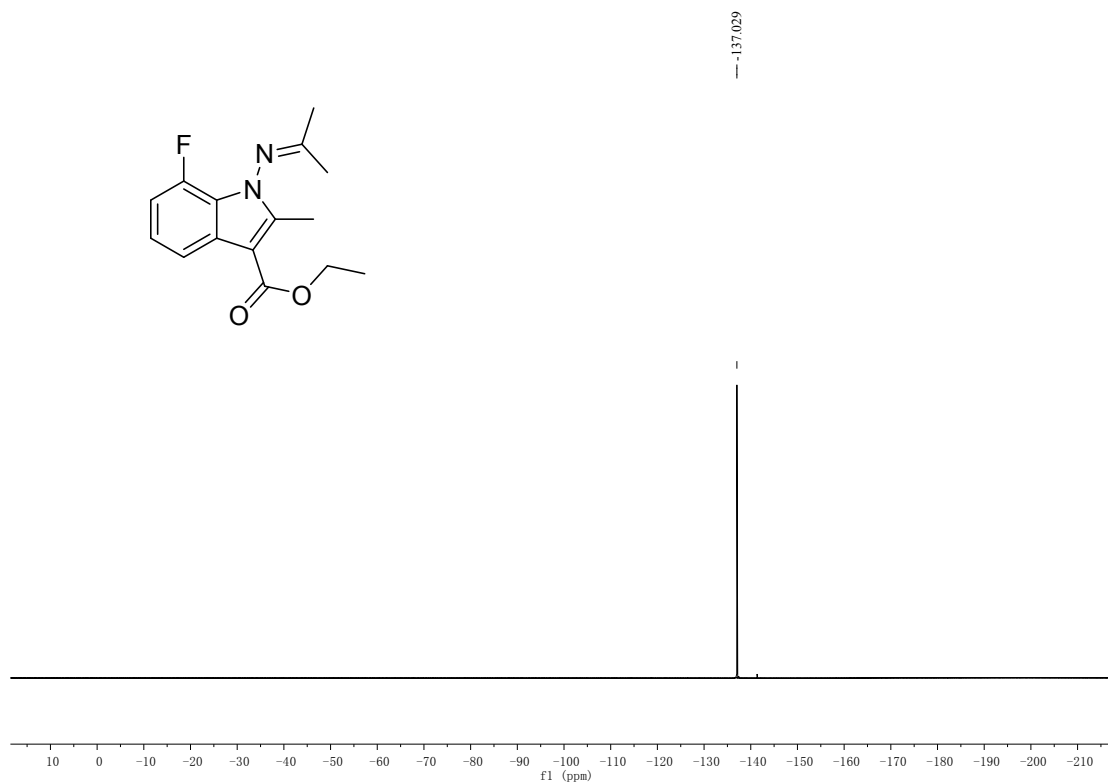

**<sup>1</sup>H, <sup>13</sup>C spectra of 4m**

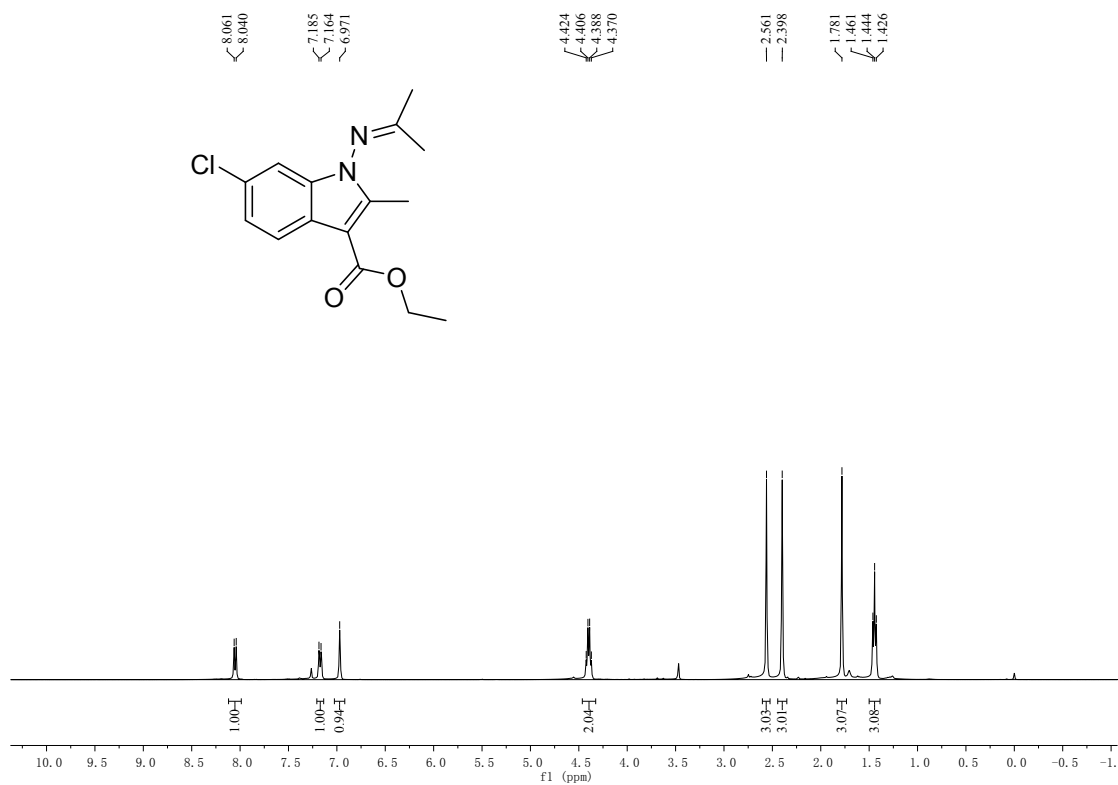

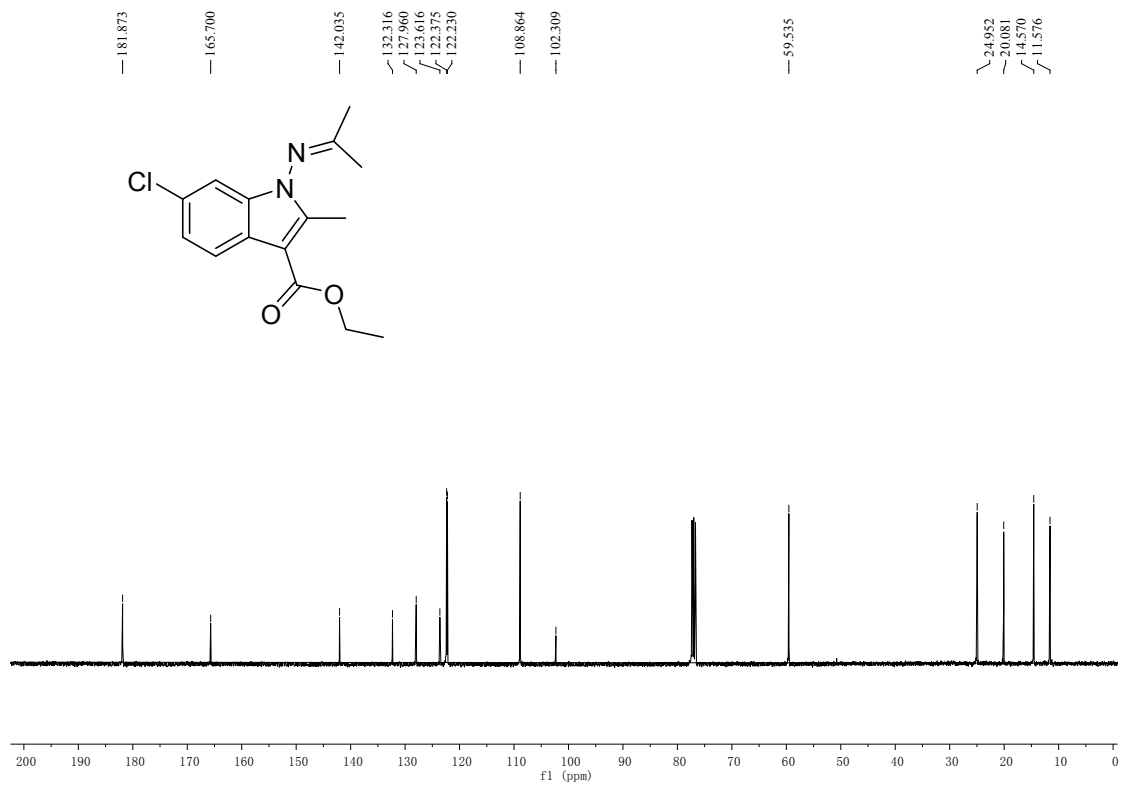

**<sup>1</sup>H, <sup>13</sup>C spectra of 4n**

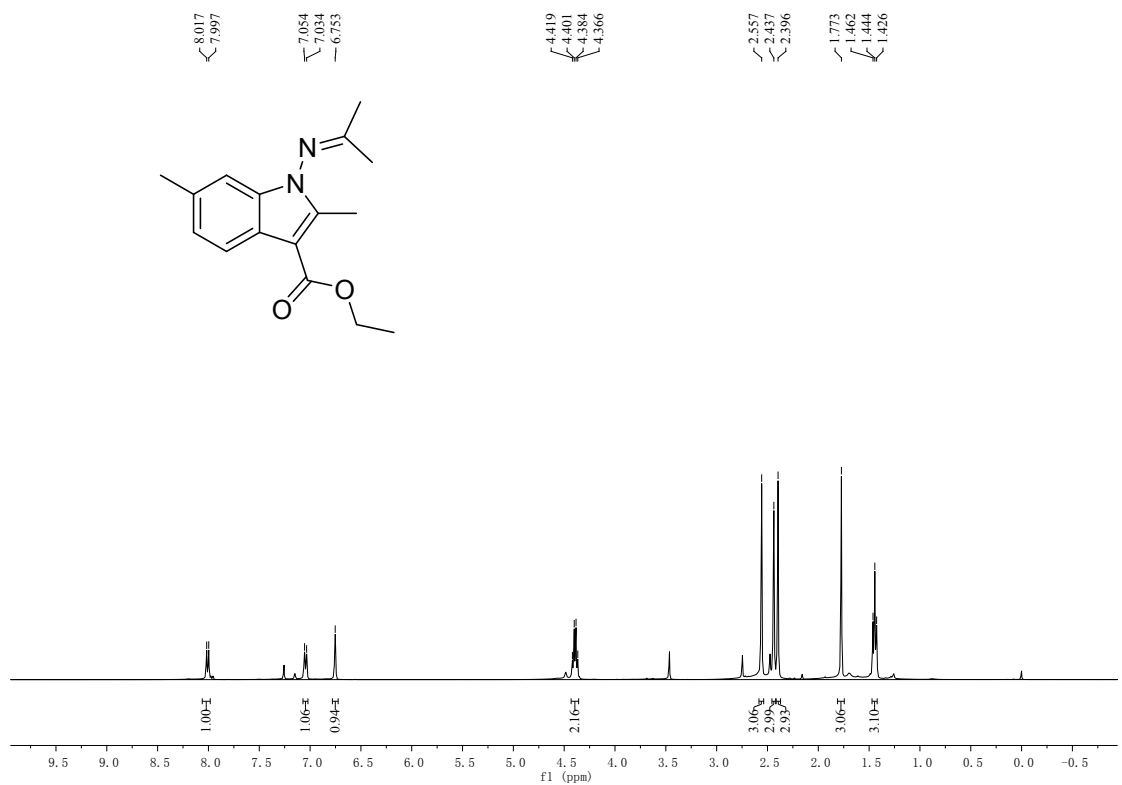



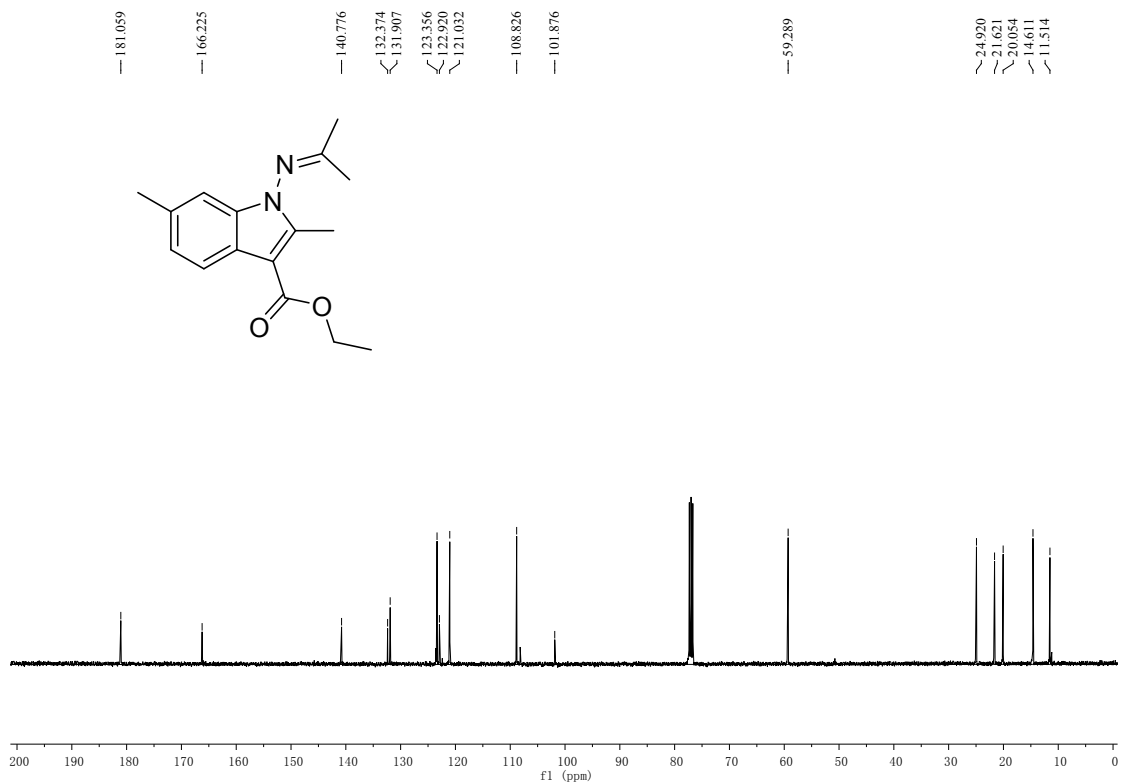

$^1\text{H}$ ,  $^{13}\text{C}$ ,  $^{19}\text{F}$  spectra of 40

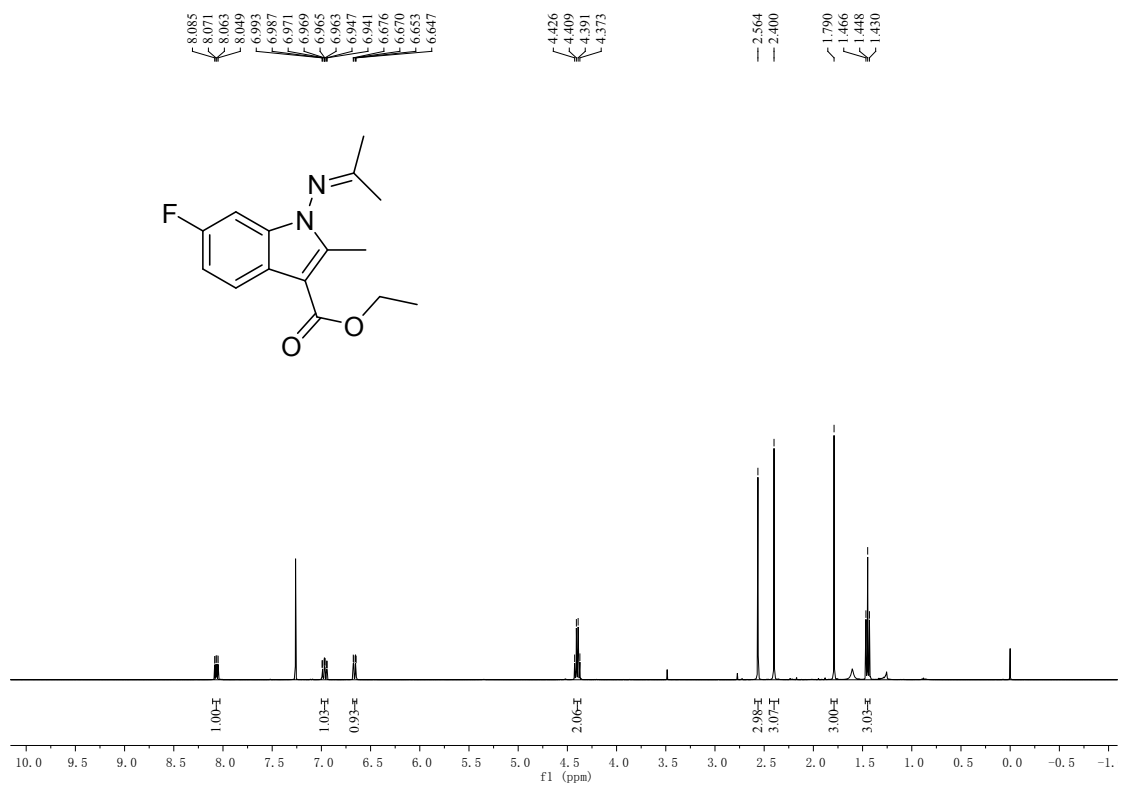

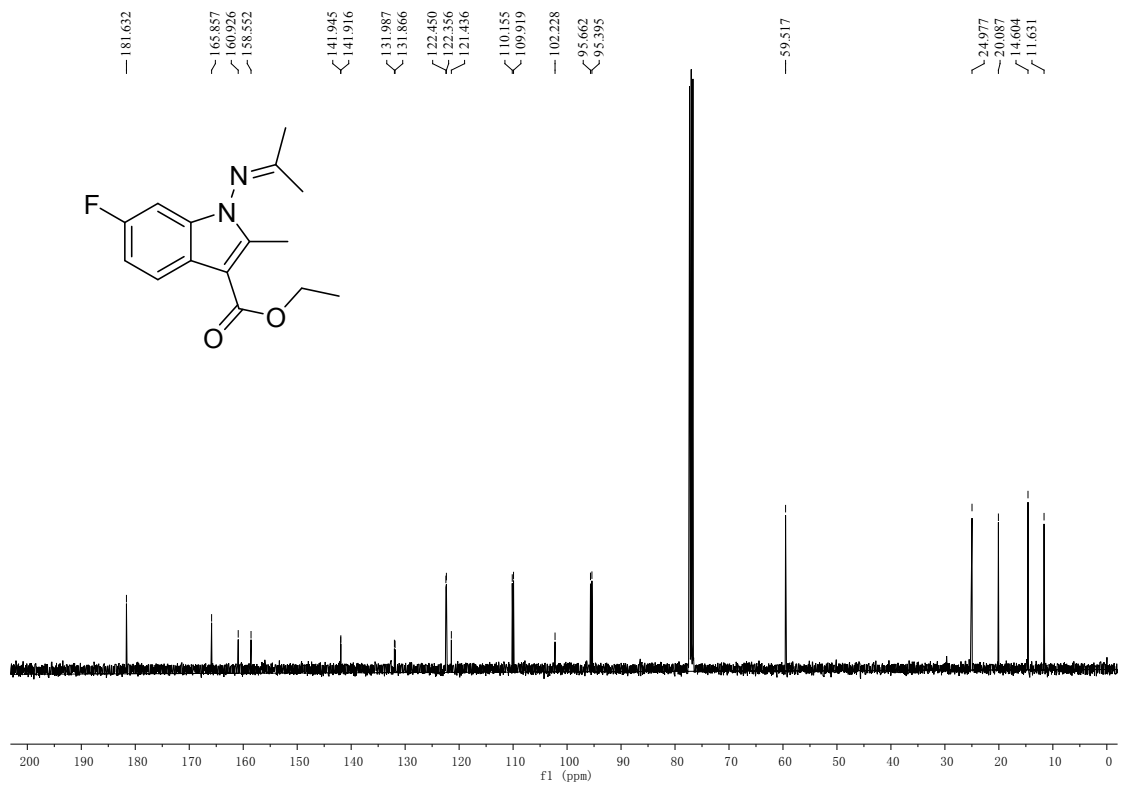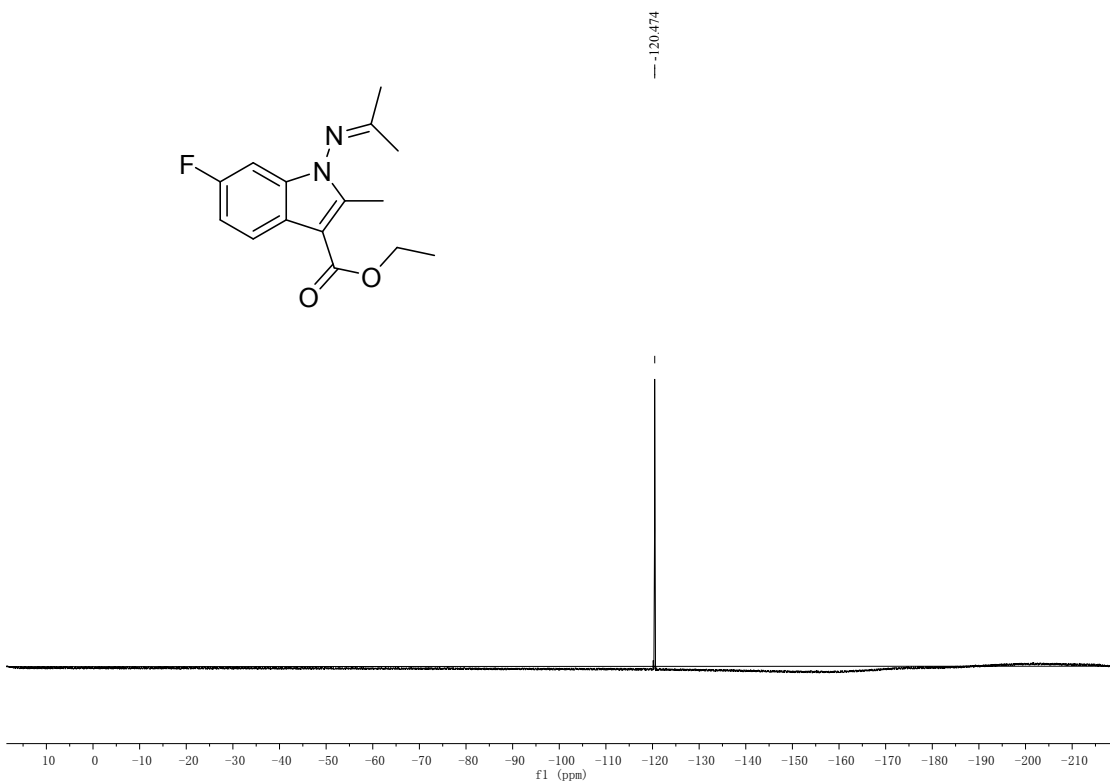

**$^1\text{H}$ ,  $^{13}\text{C}$ ,  $^{19}\text{F}$  spectra of 40'**

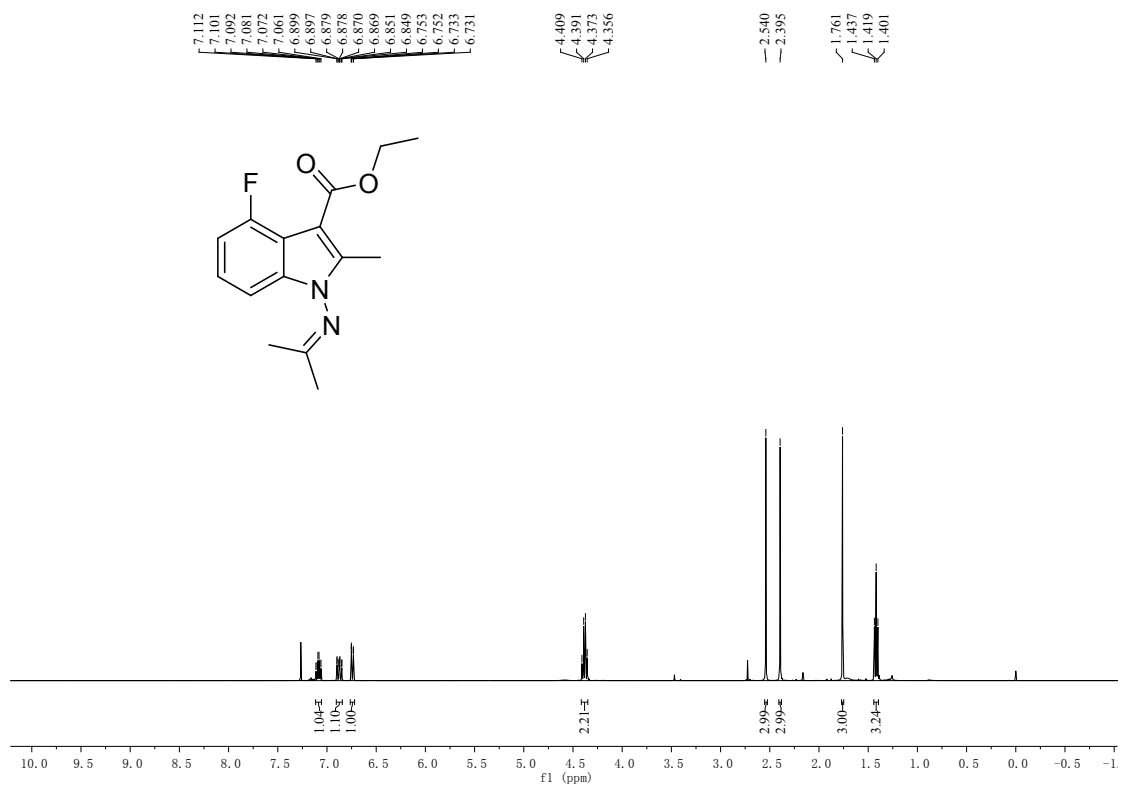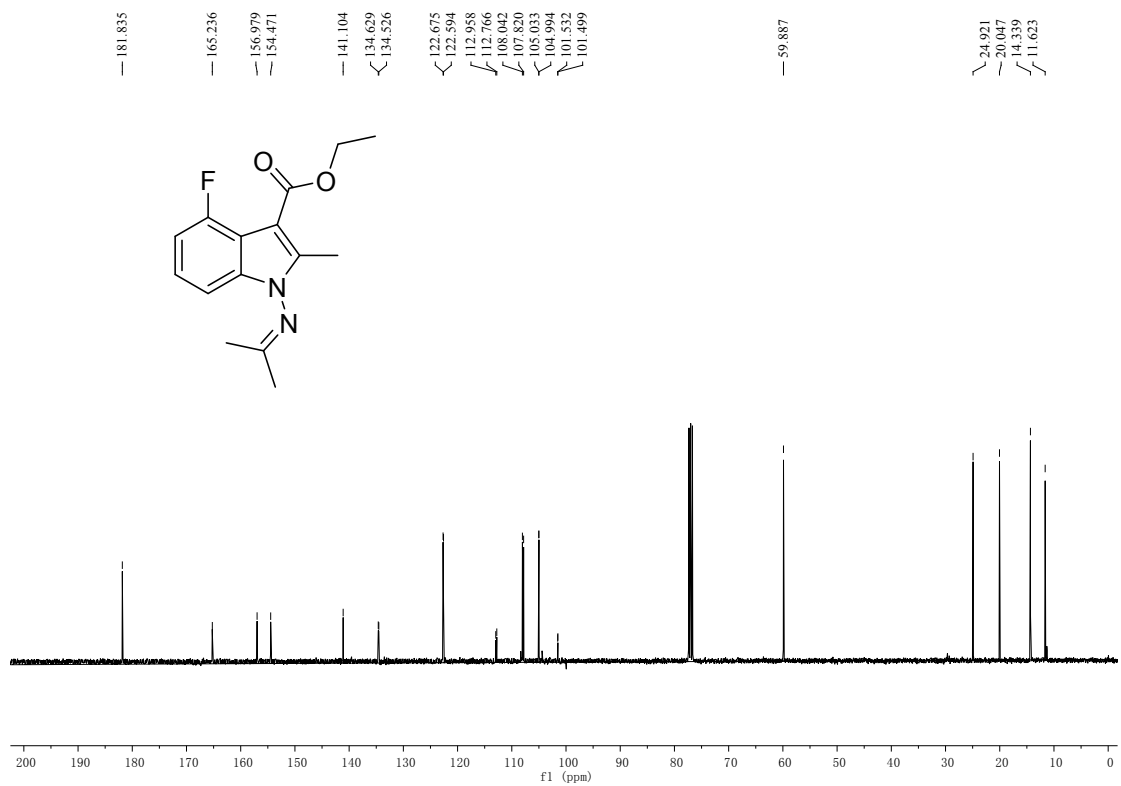

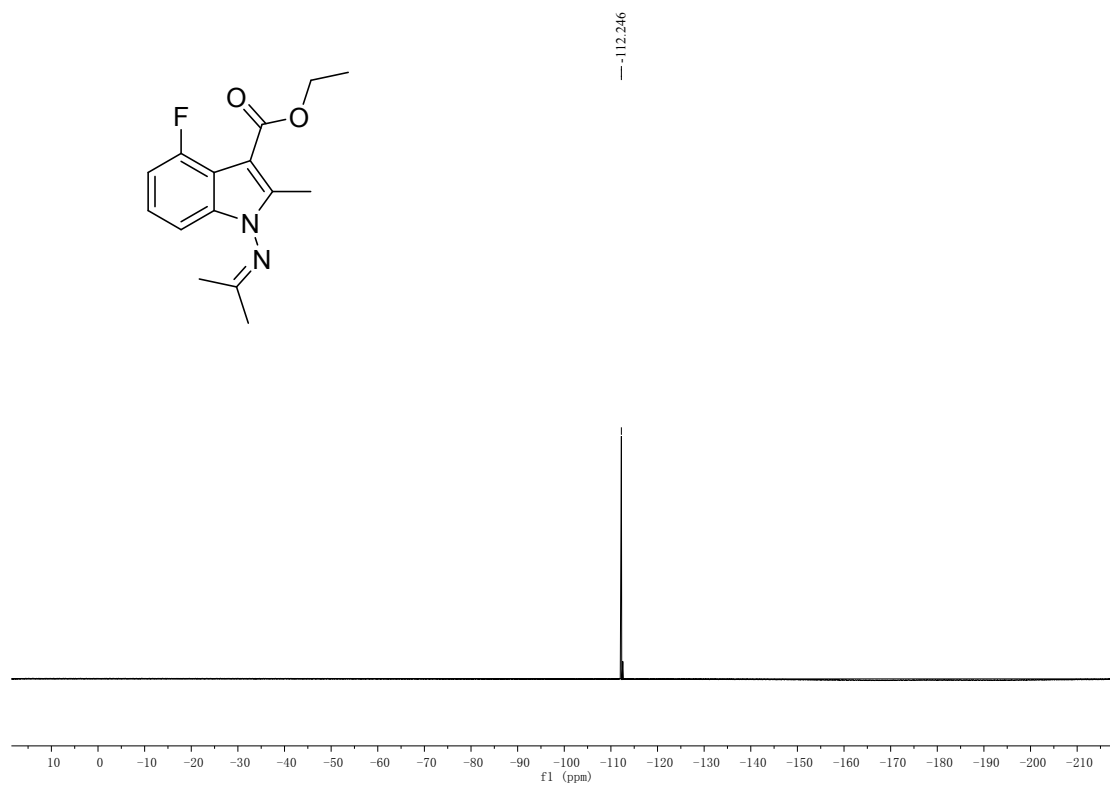

**$^1\text{H}$ ,  $^{13}\text{C}$  spectra of 4p**

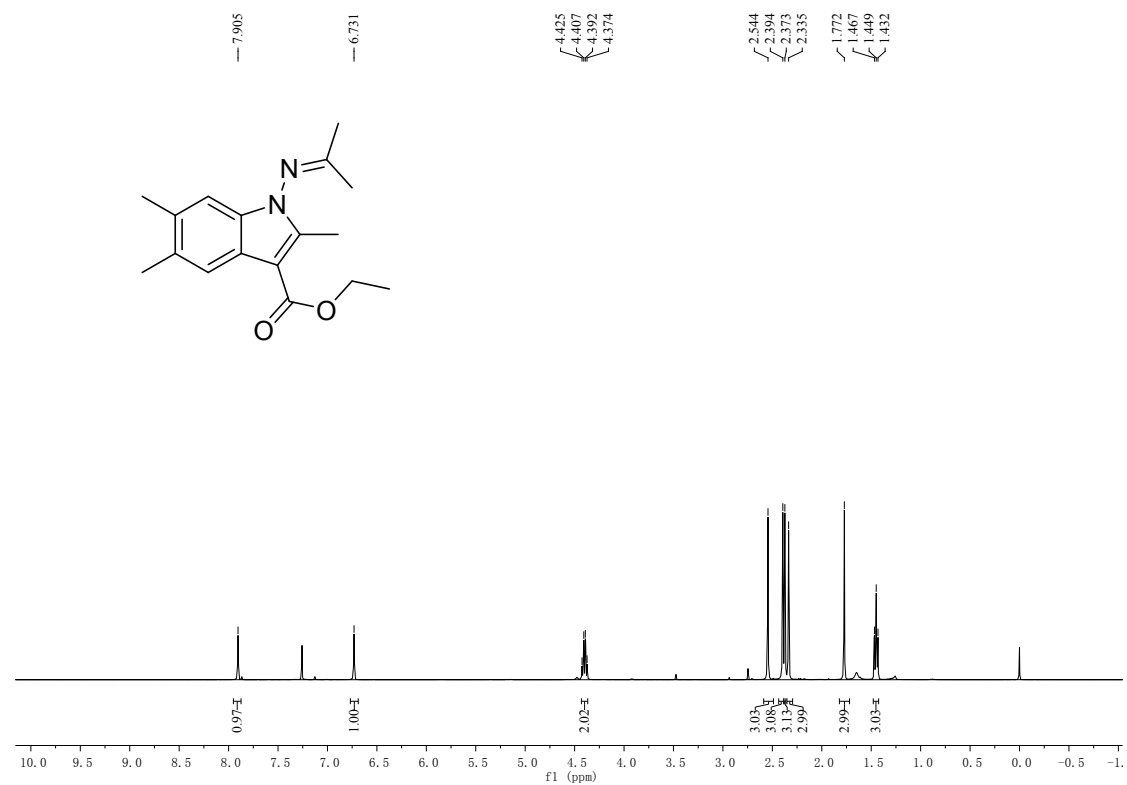

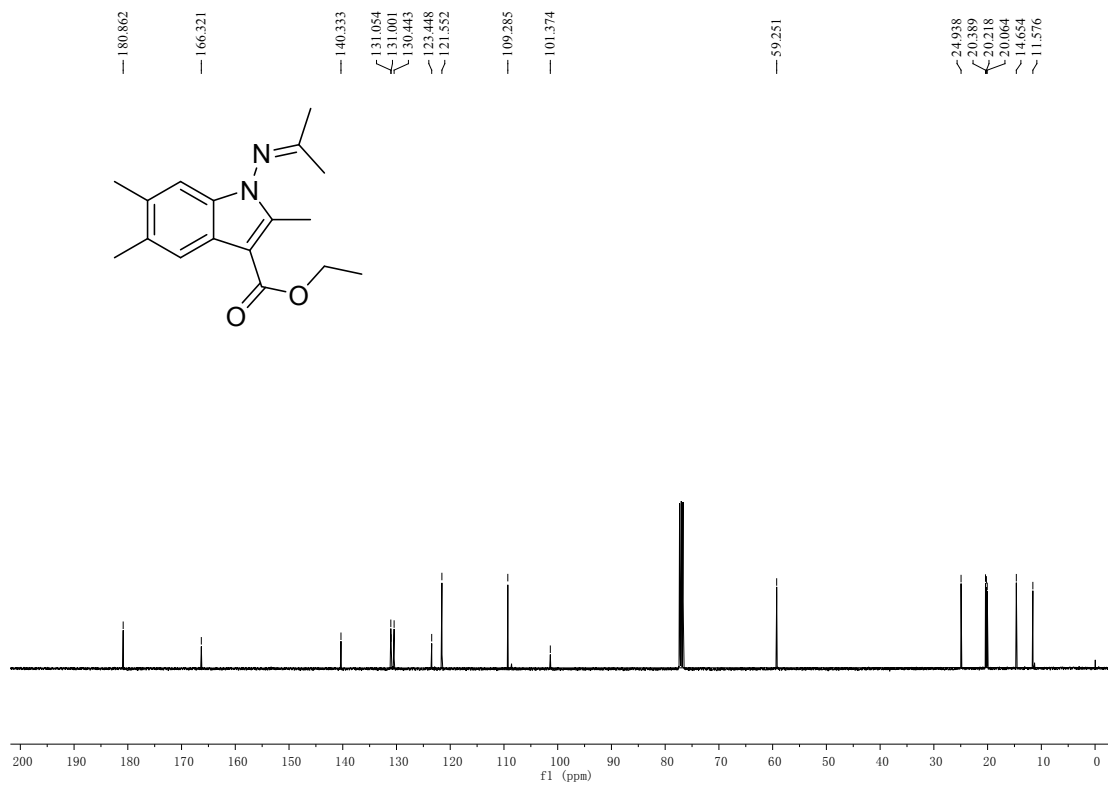

<sup>1</sup>H, <sup>13</sup>C spectra of 4q

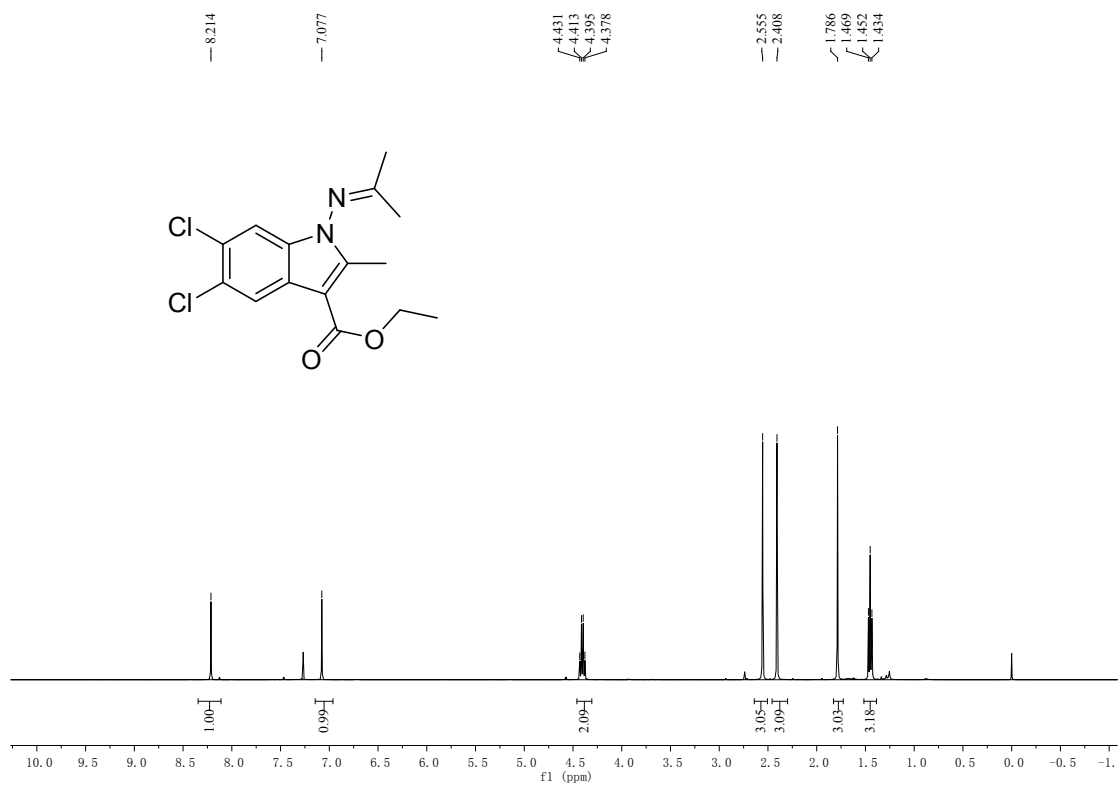

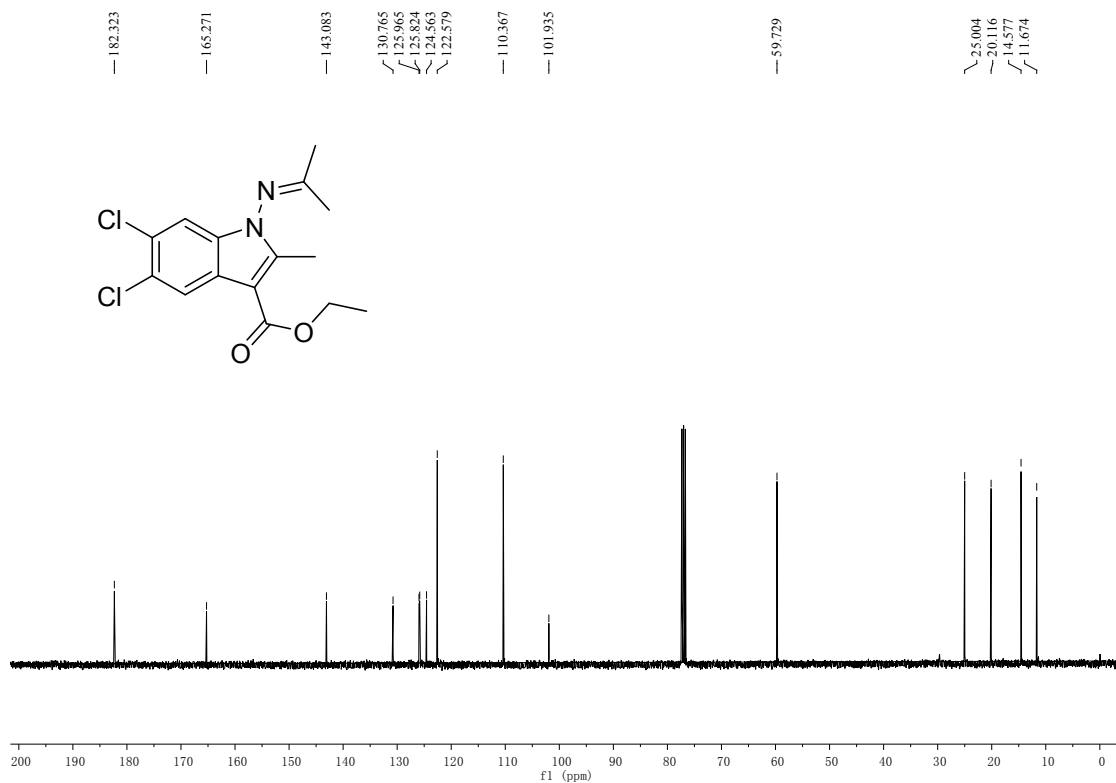

**<sup>1</sup>H, <sup>13</sup>C, <sup>19</sup>F spectra of 4r**

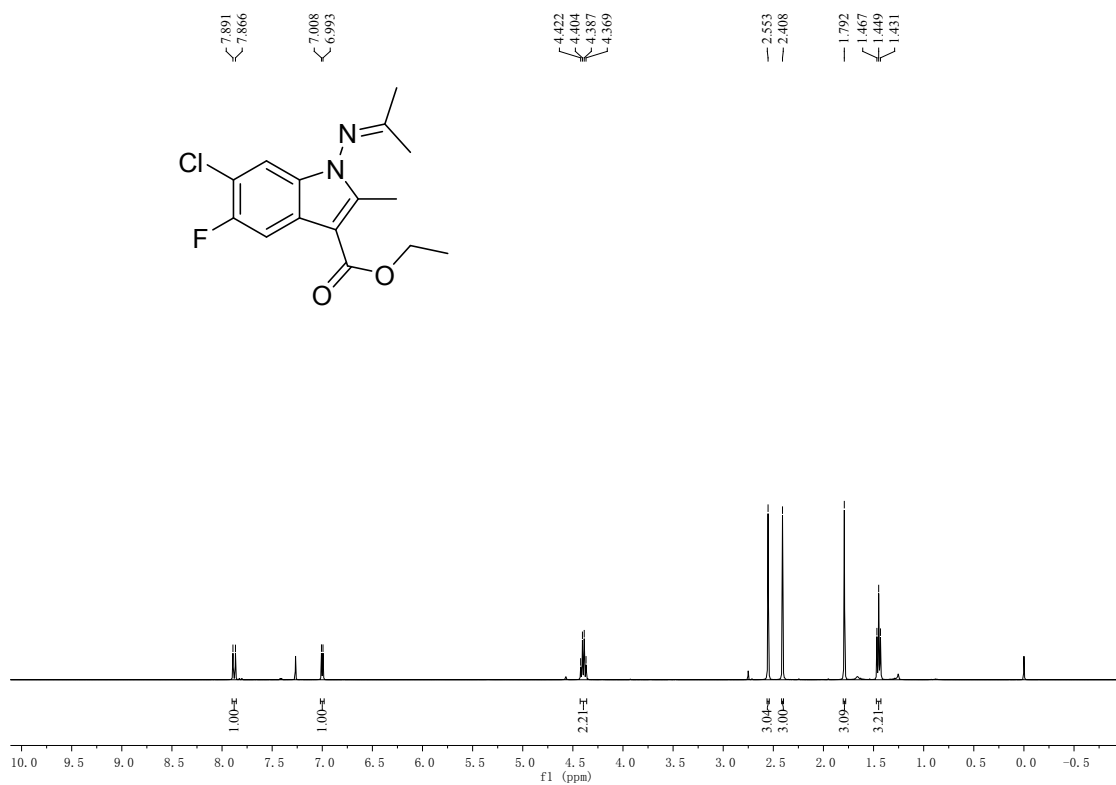

- 182.257
- 165.406
- 155.483
- 153.105
- 142.967
- 128.354
- 124.197
- 124.098
- 115.819
- 115.604
- 110.123
- 108.137
- 107.885
- 102.407
- 102.365
- 59.667
- 24.989
- 20.098
- 14.573
- 11.718

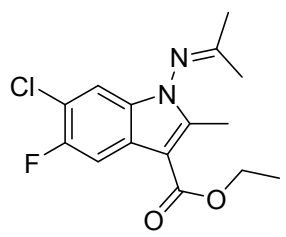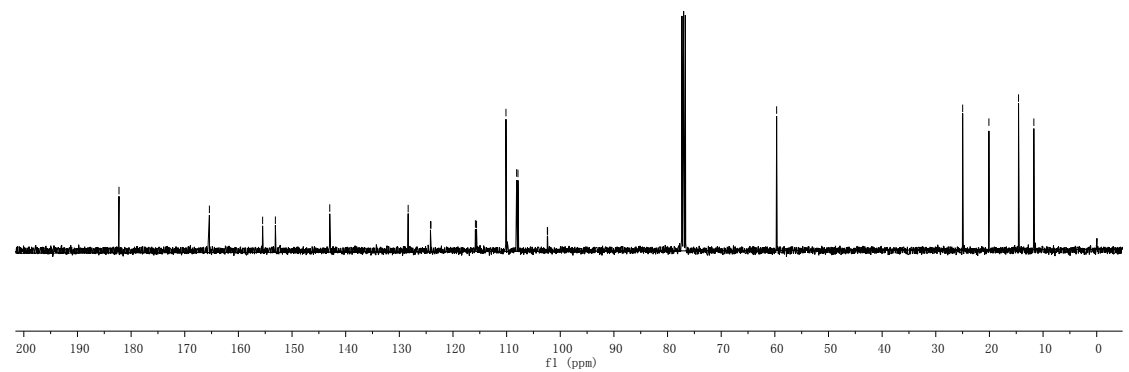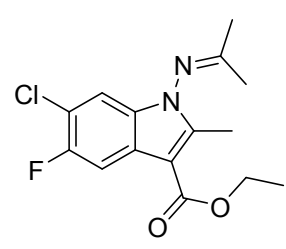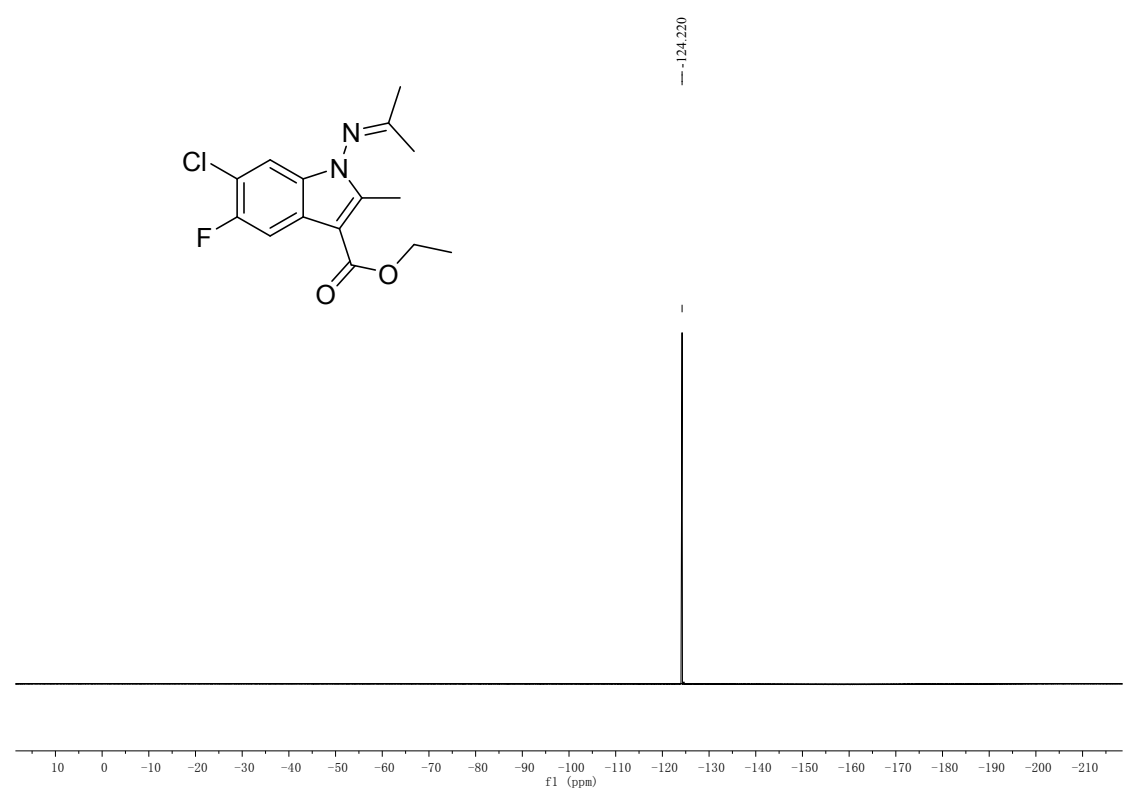

<sup>1</sup>H, <sup>13</sup>C, <sup>19</sup>F spectra of 4s

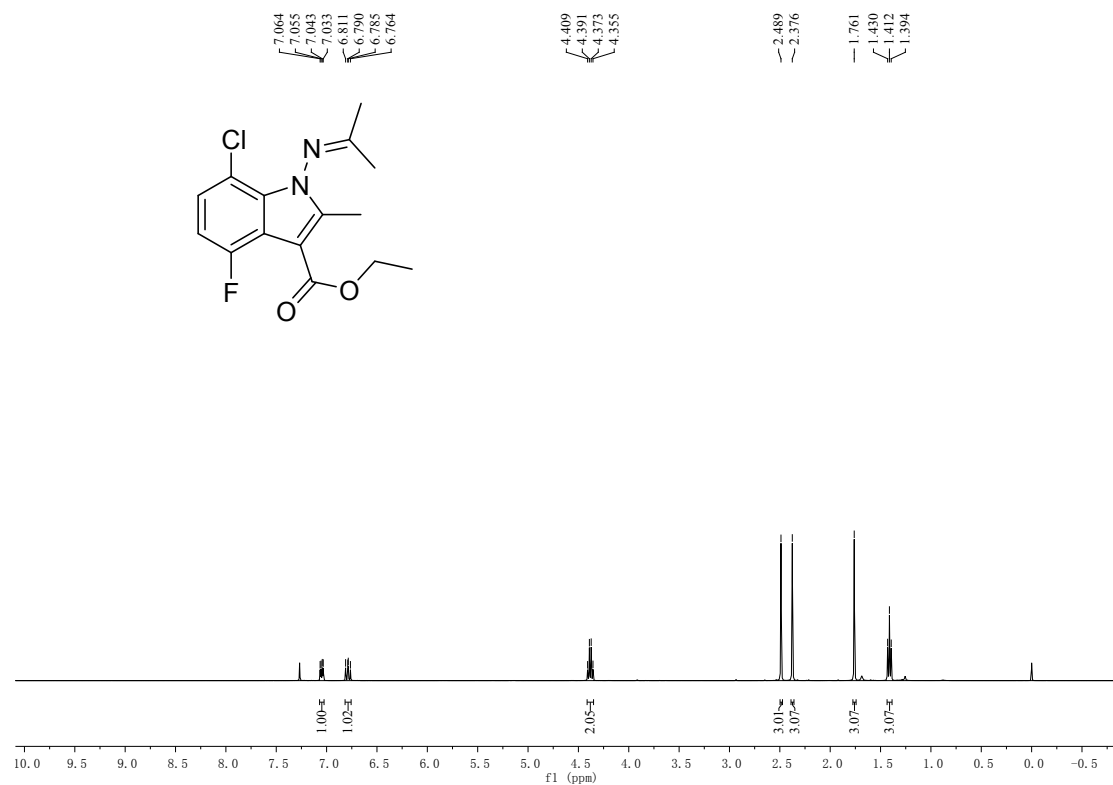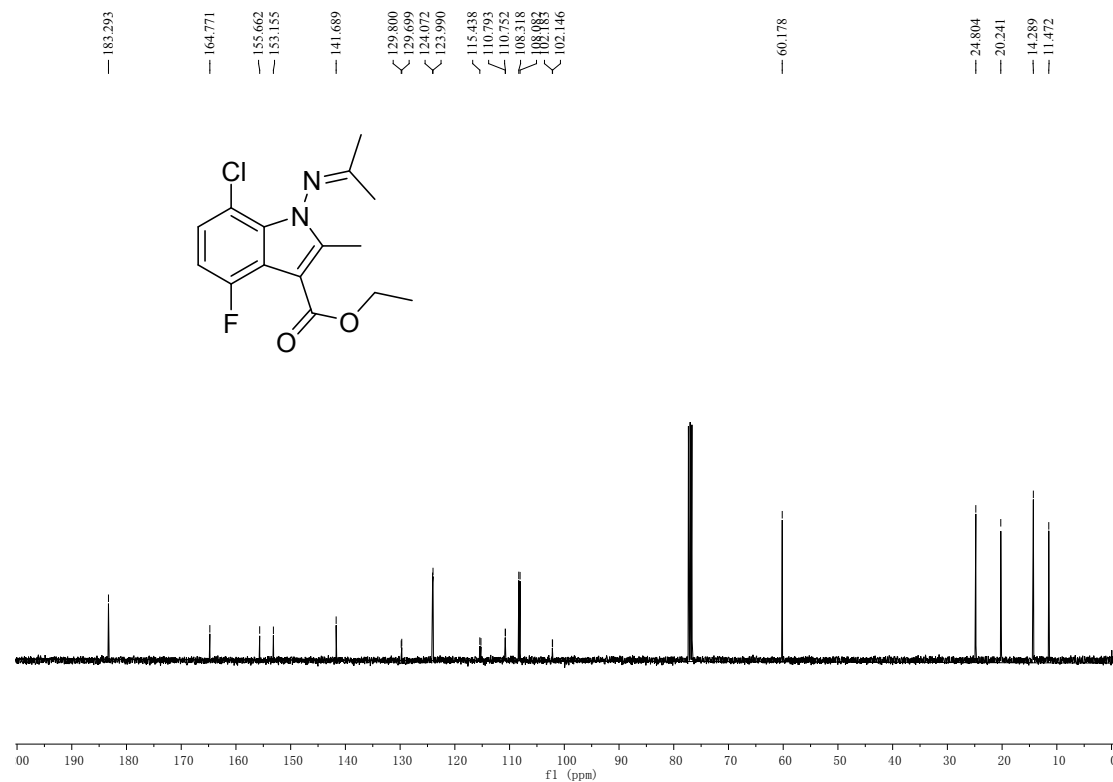



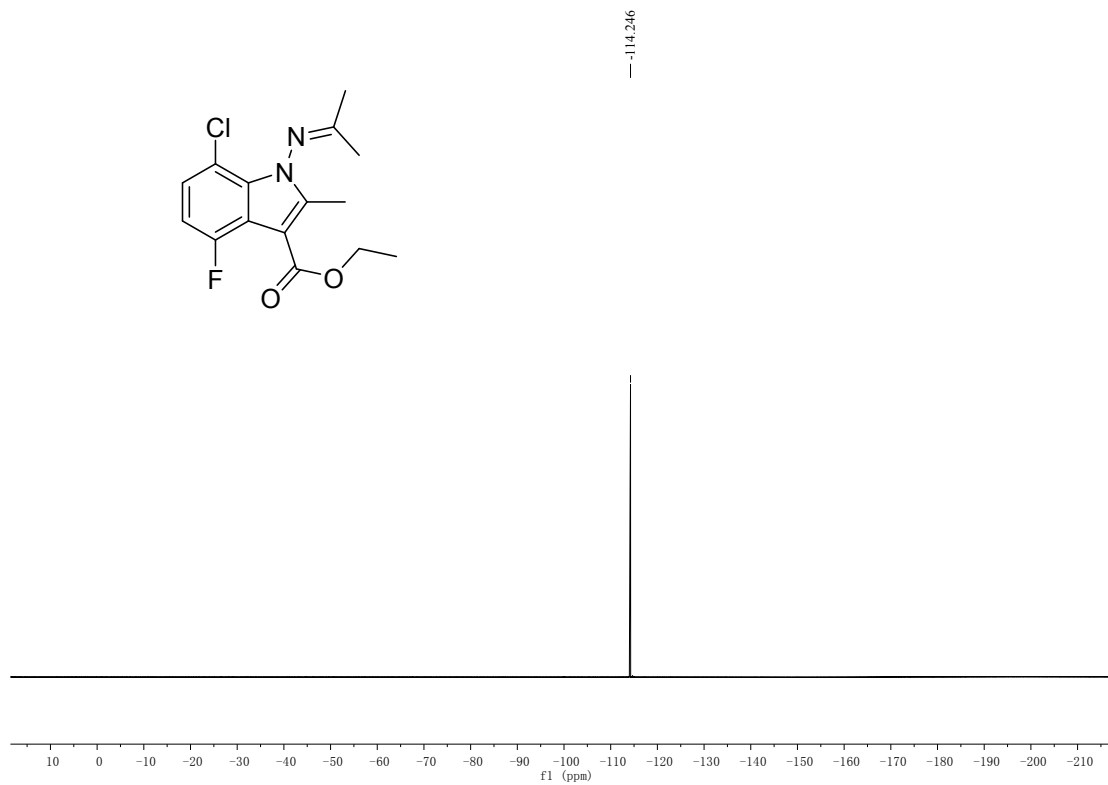

**$^1\text{H}$ ,  $^{13}\text{C}$  spectra of 4t**

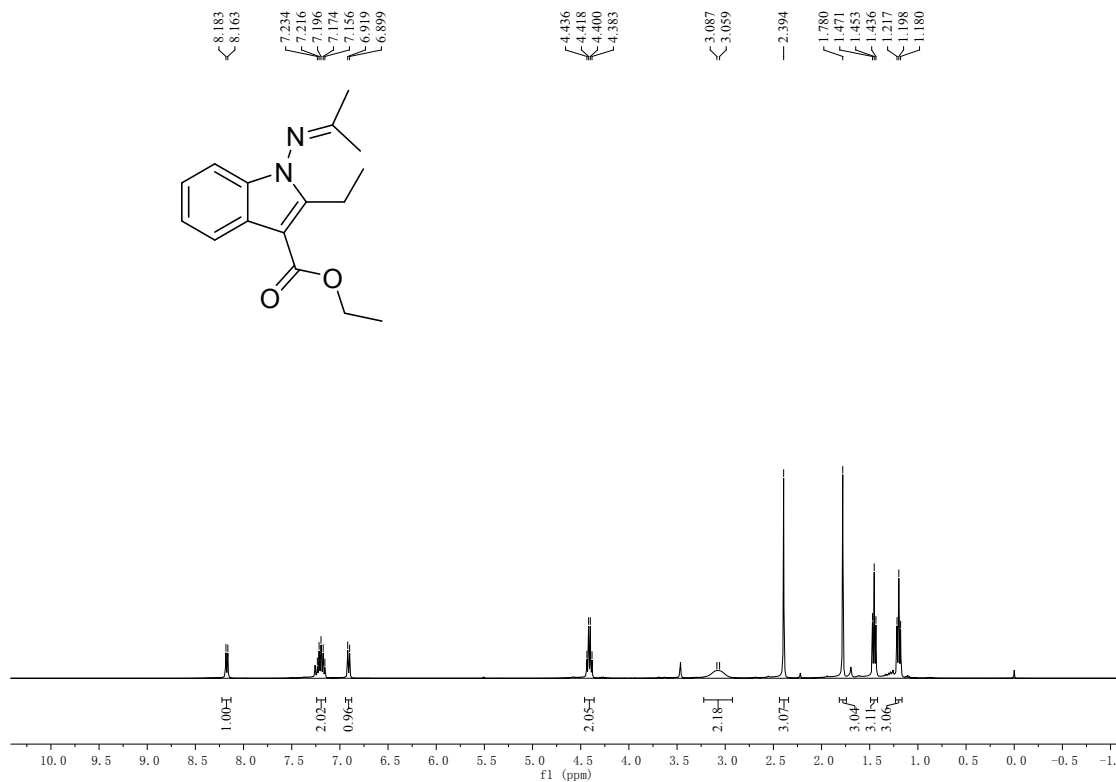

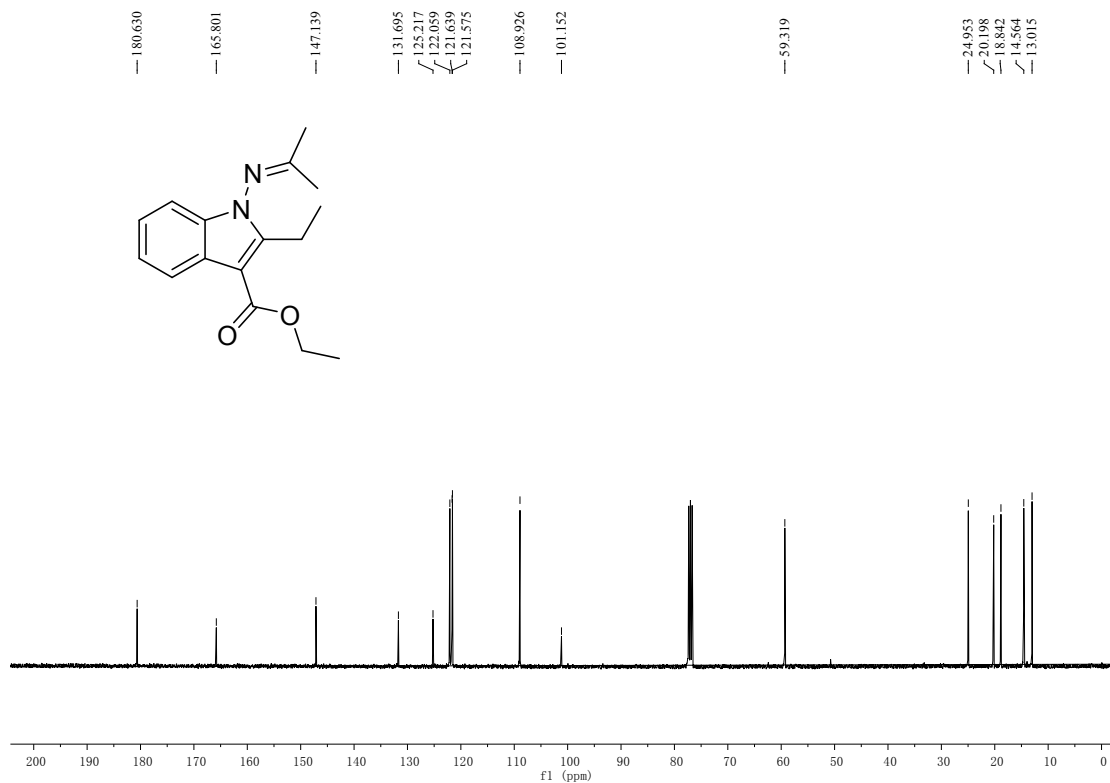

**<sup>1</sup>H, <sup>13</sup>C spectra of 4u**

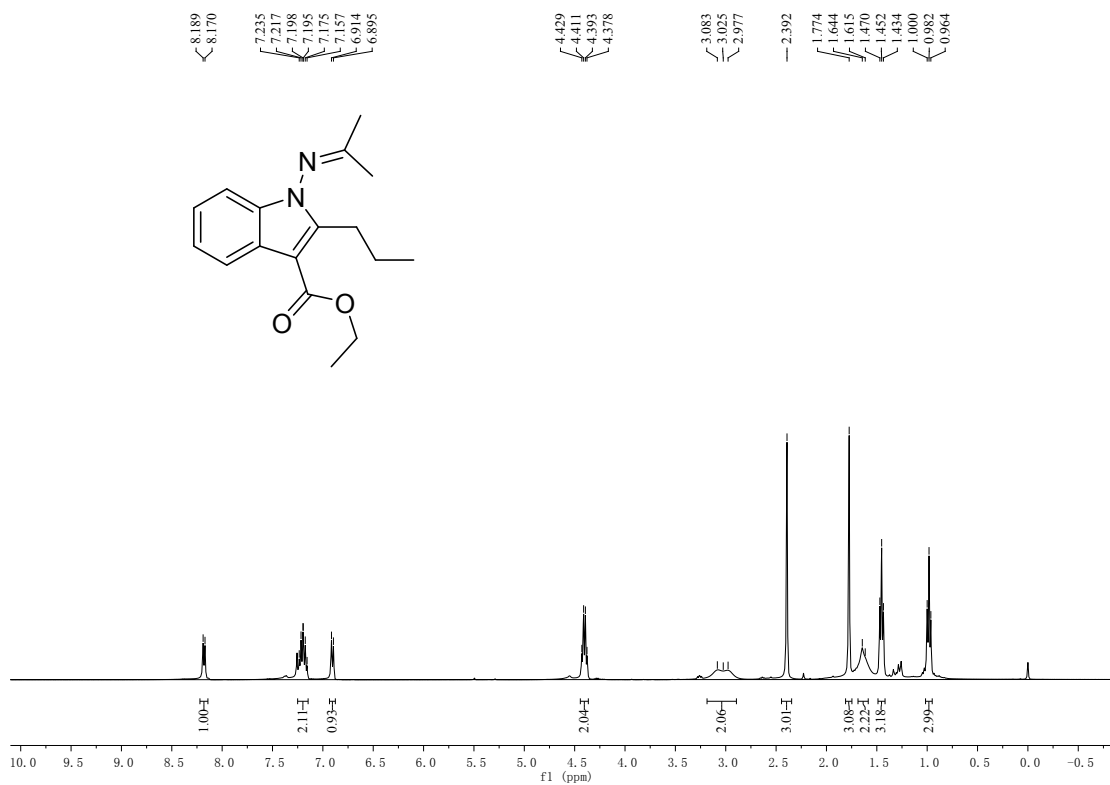

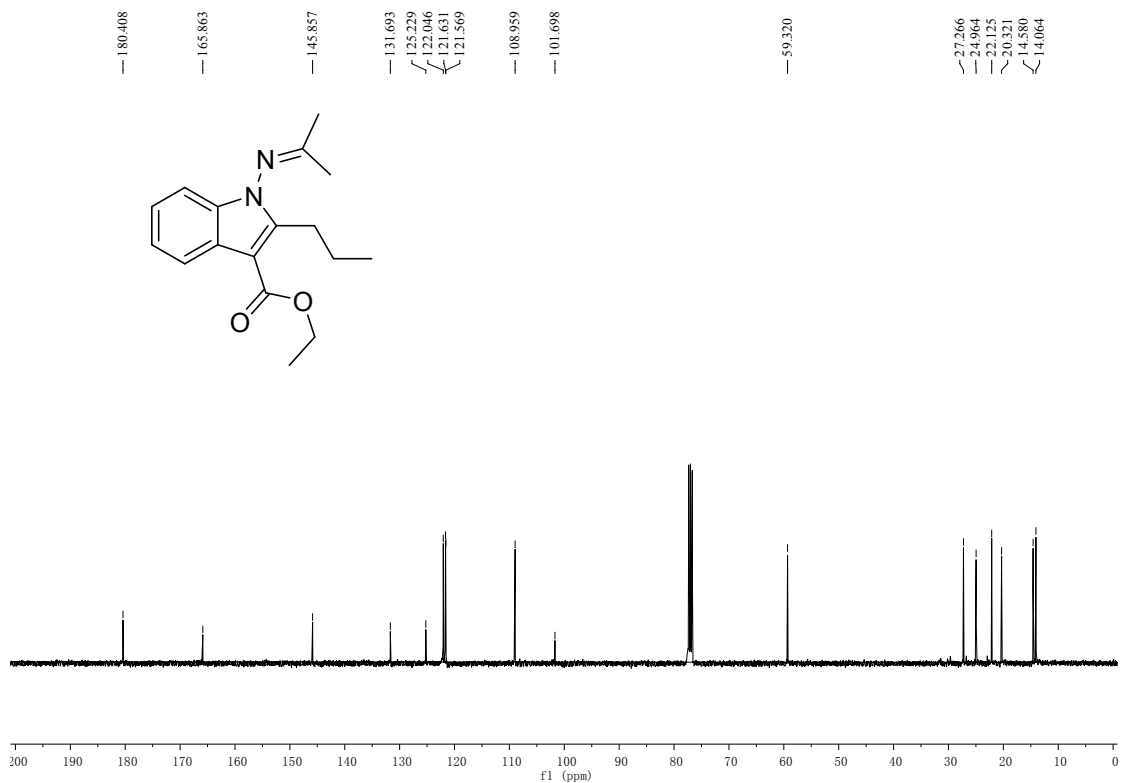

**<sup>1</sup>H, <sup>13</sup>C spectra of 4v**

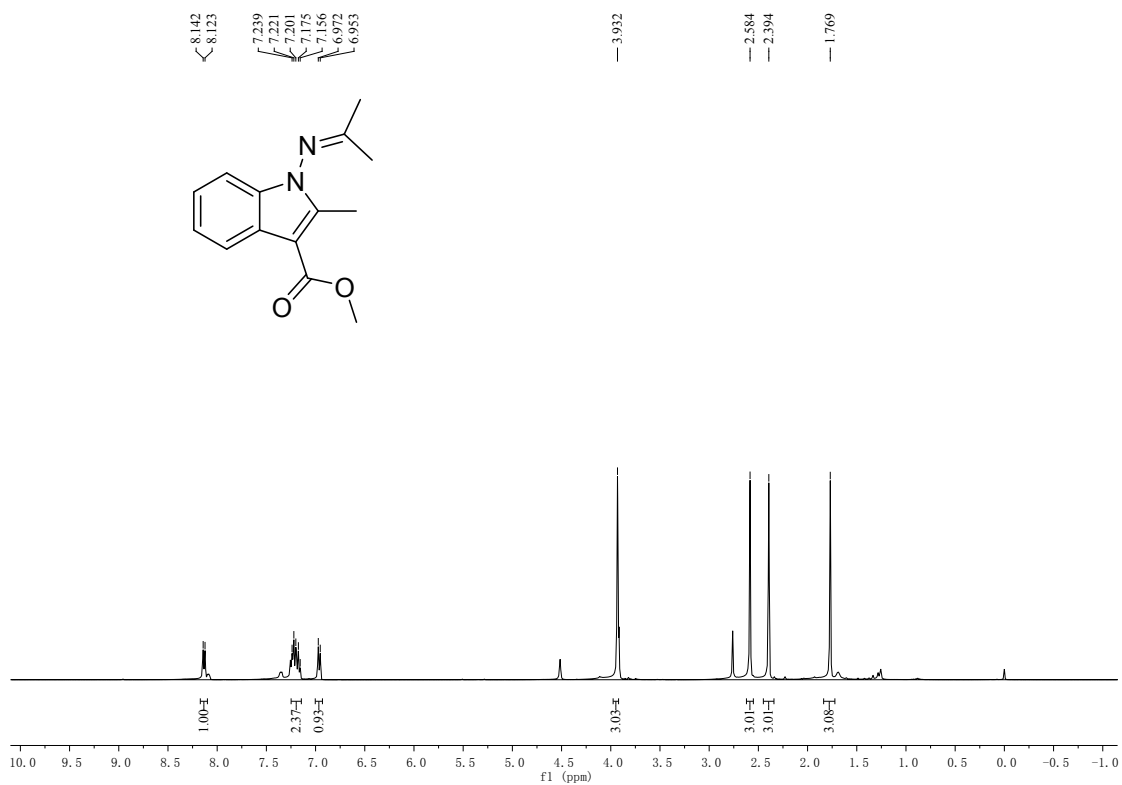

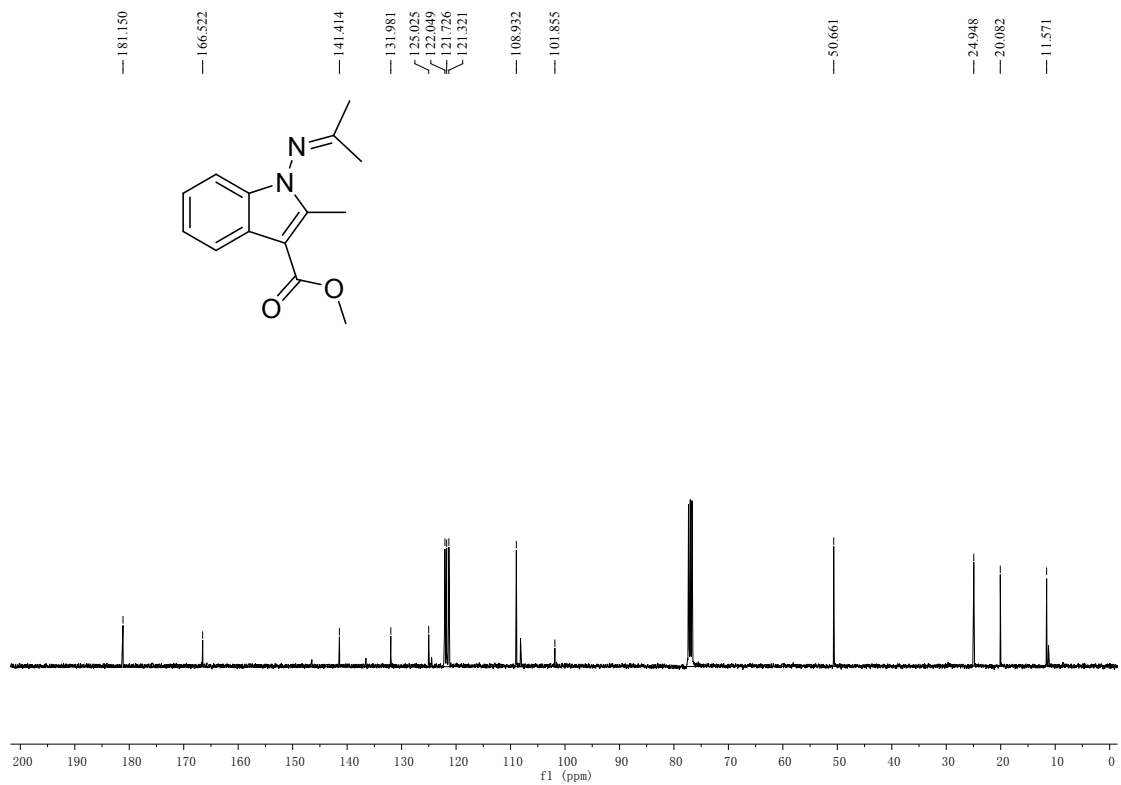

<sup>1</sup>H, <sup>13</sup>C spectra of 4w

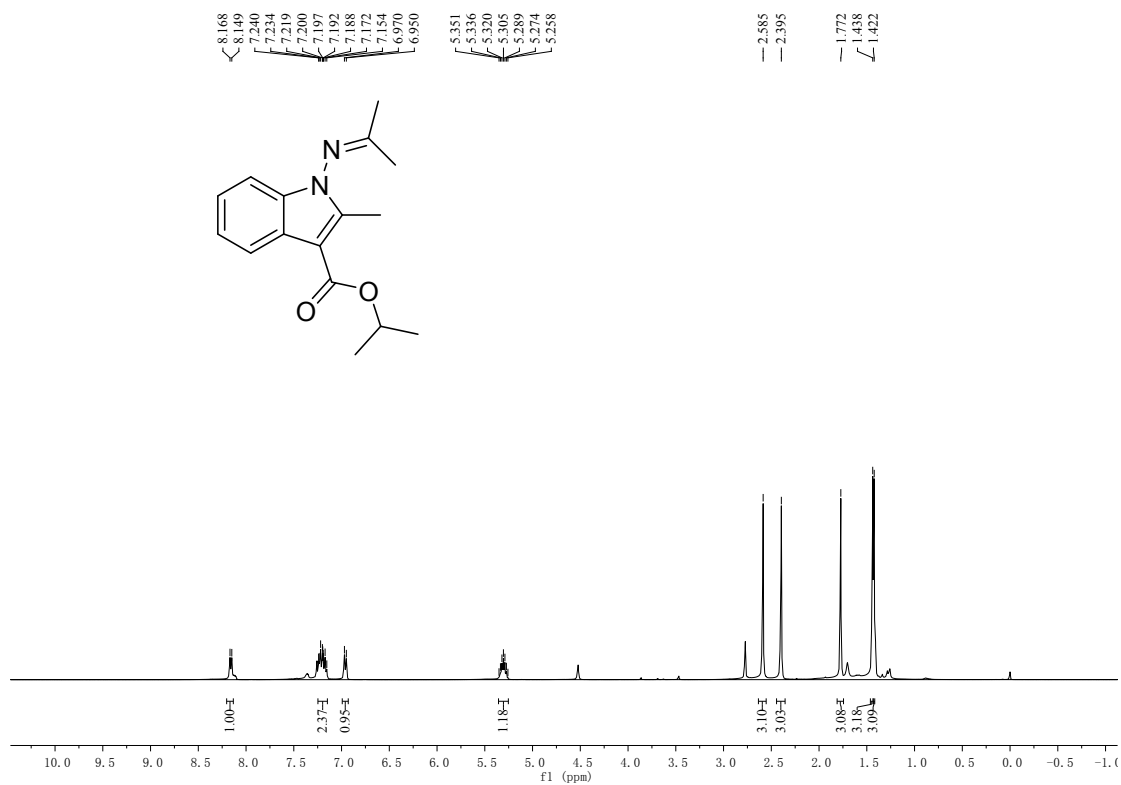

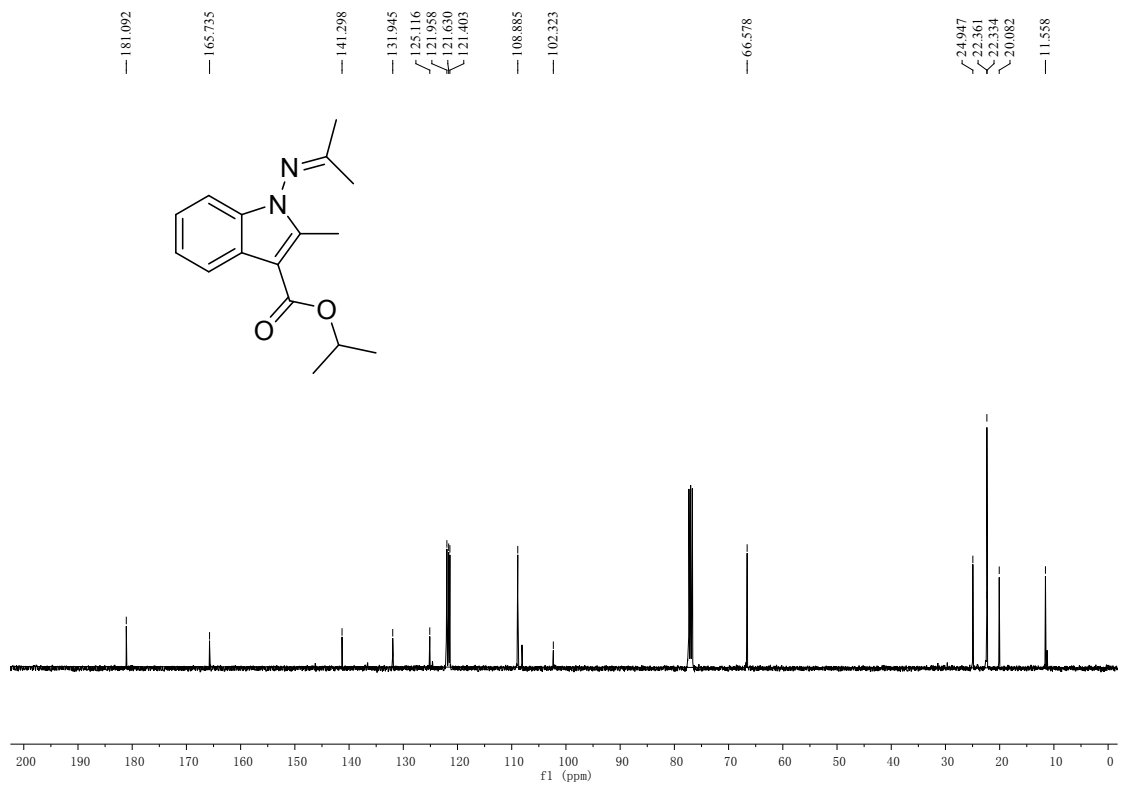

<sup>1</sup>H, <sup>13</sup>C spectra of 4x

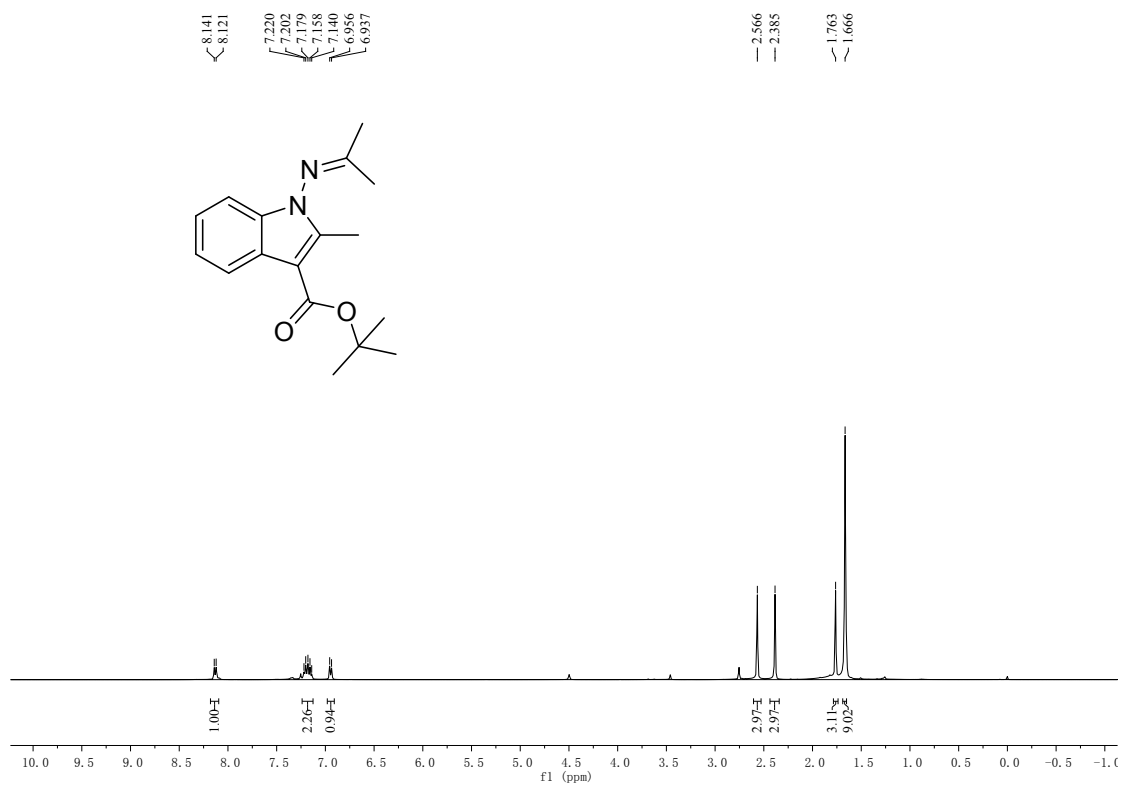

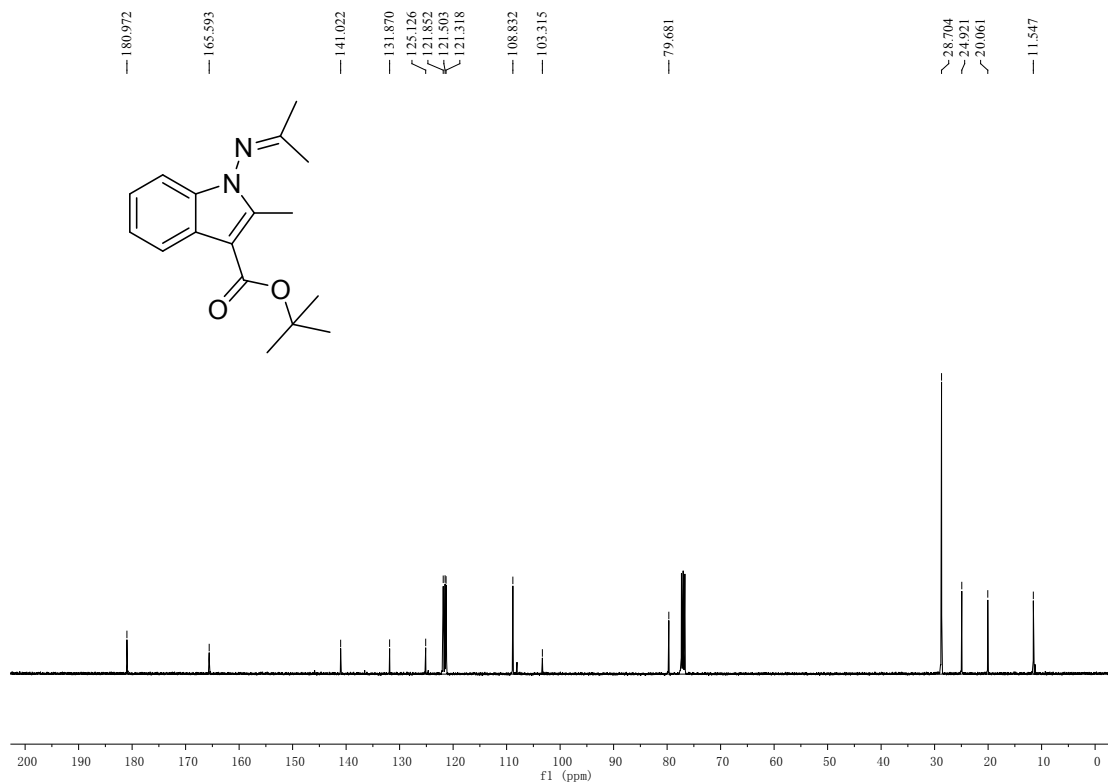

**<sup>1</sup>H, <sup>13</sup>C spectra of 4y**

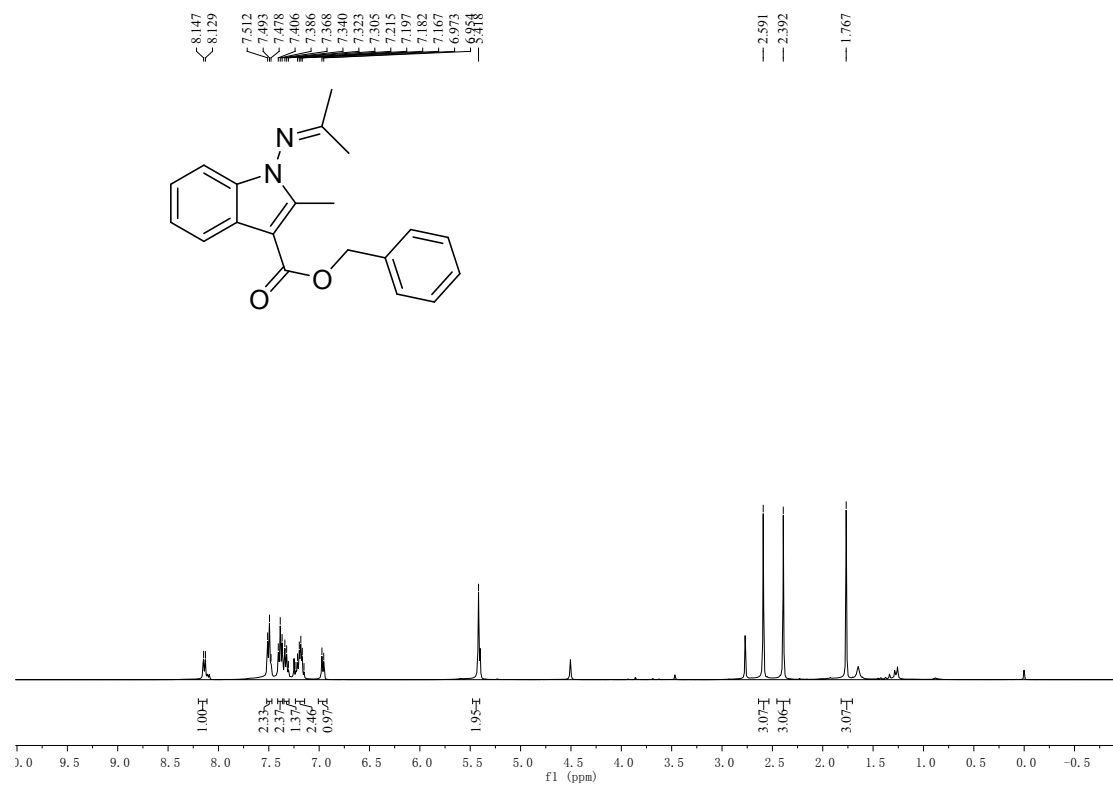

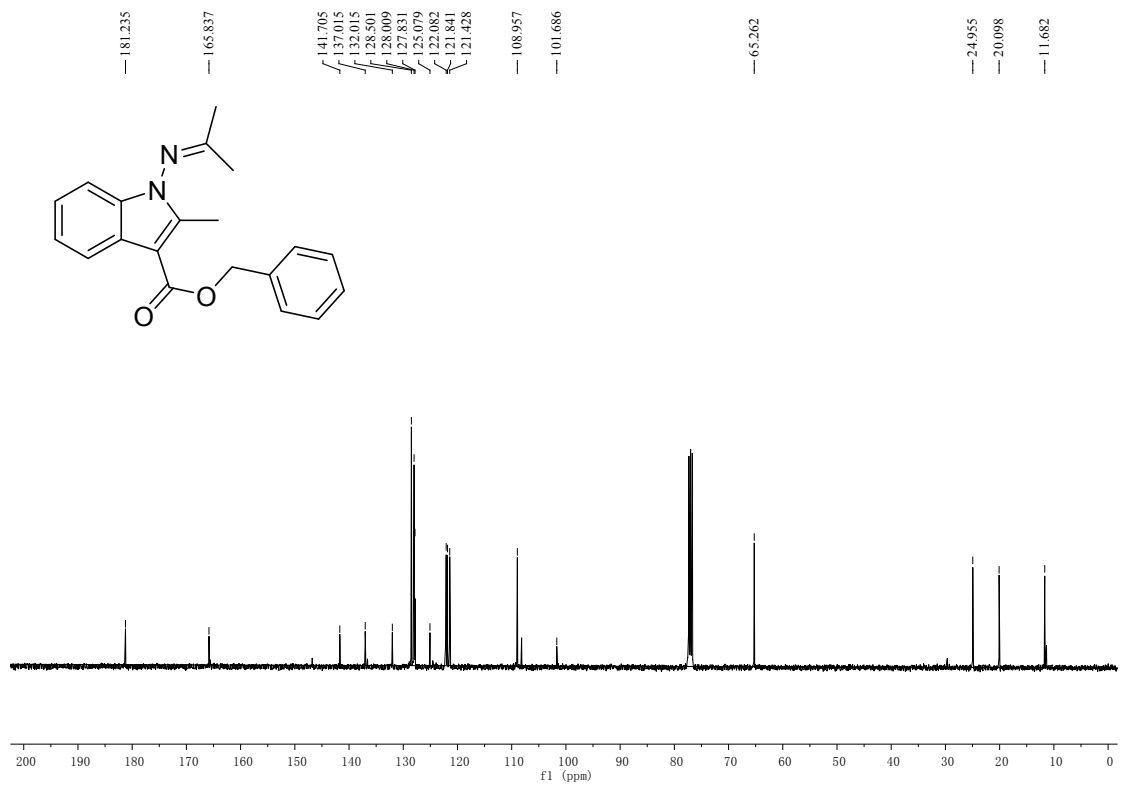

**<sup>1</sup>H, <sup>13</sup>C spectra of 4z**

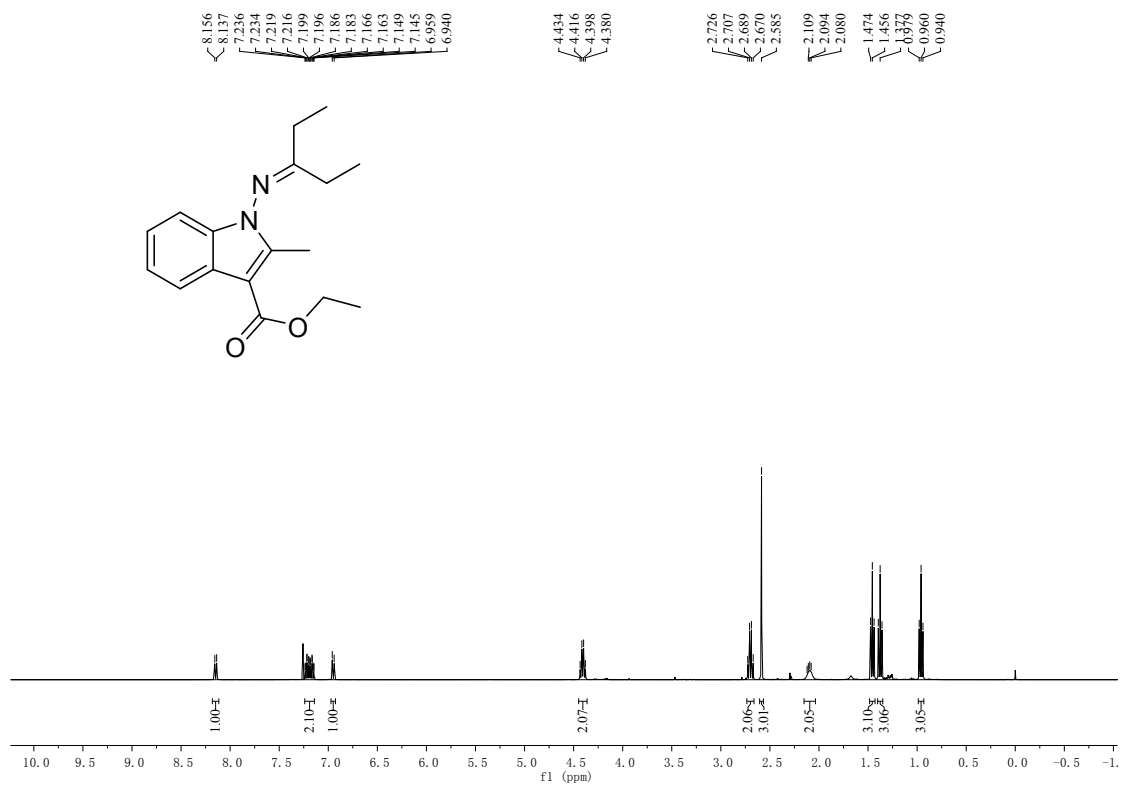

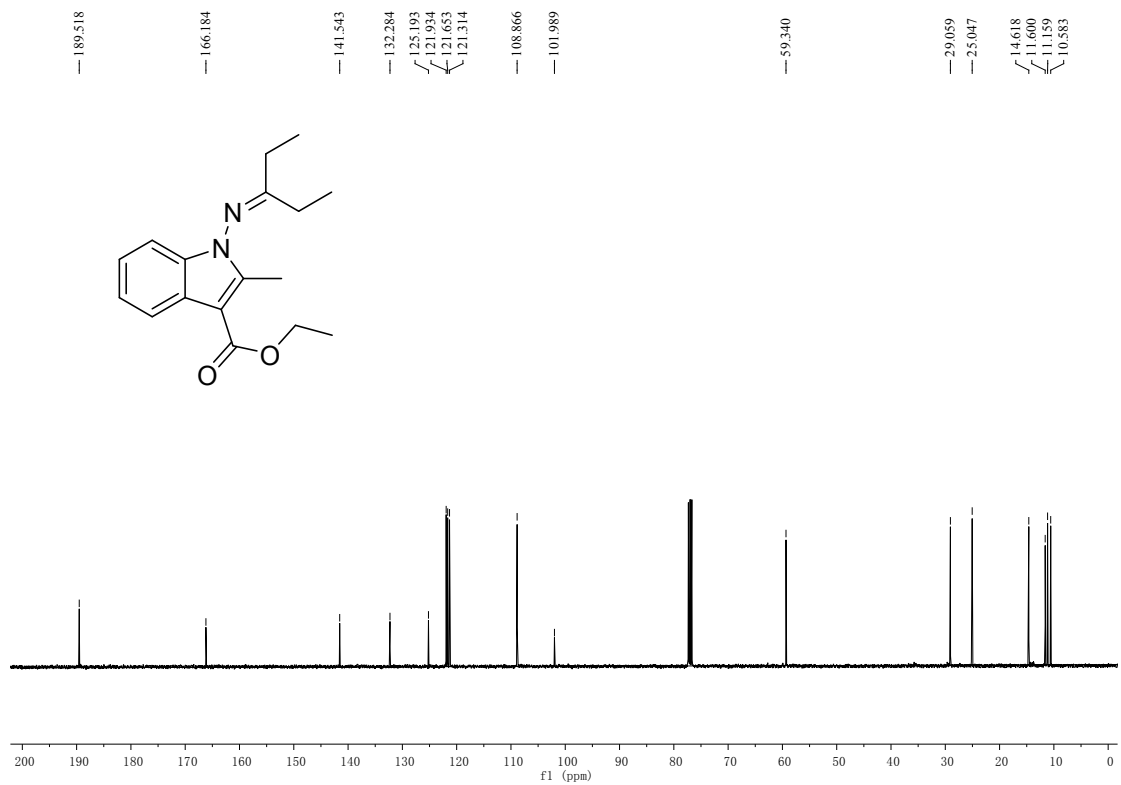

**<sup>1</sup>H, <sup>13</sup>C spectra of 4za**

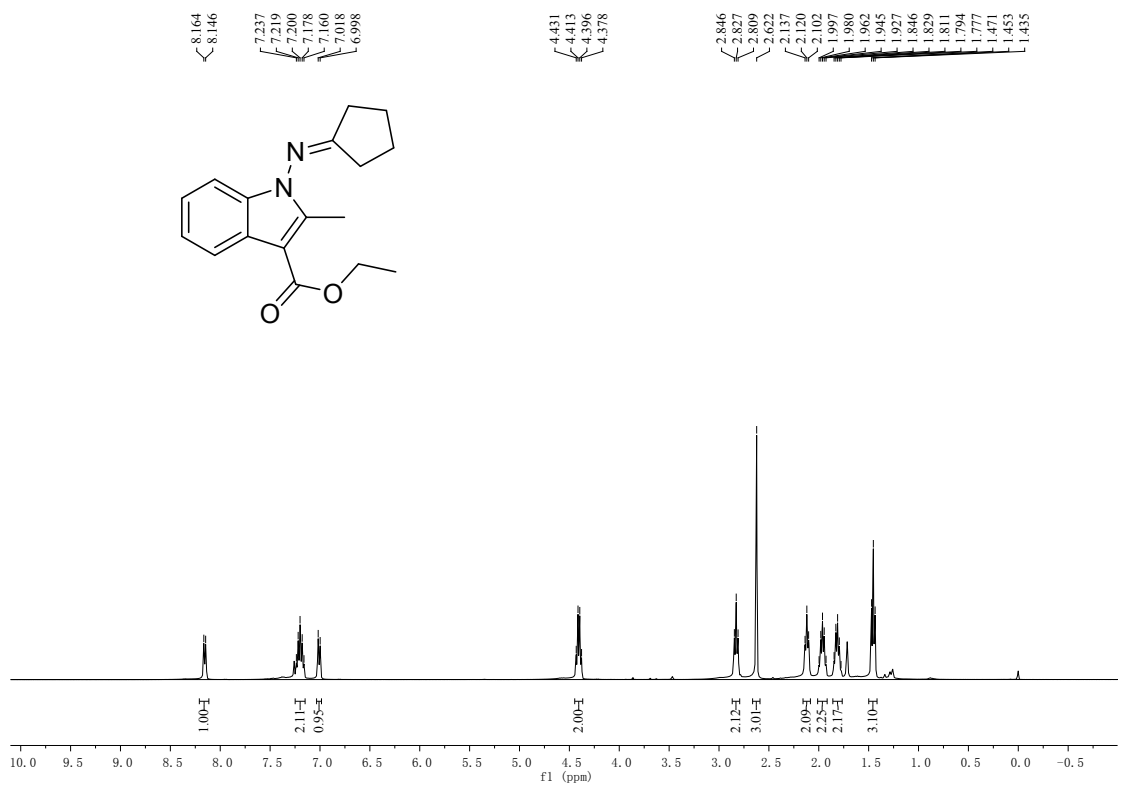



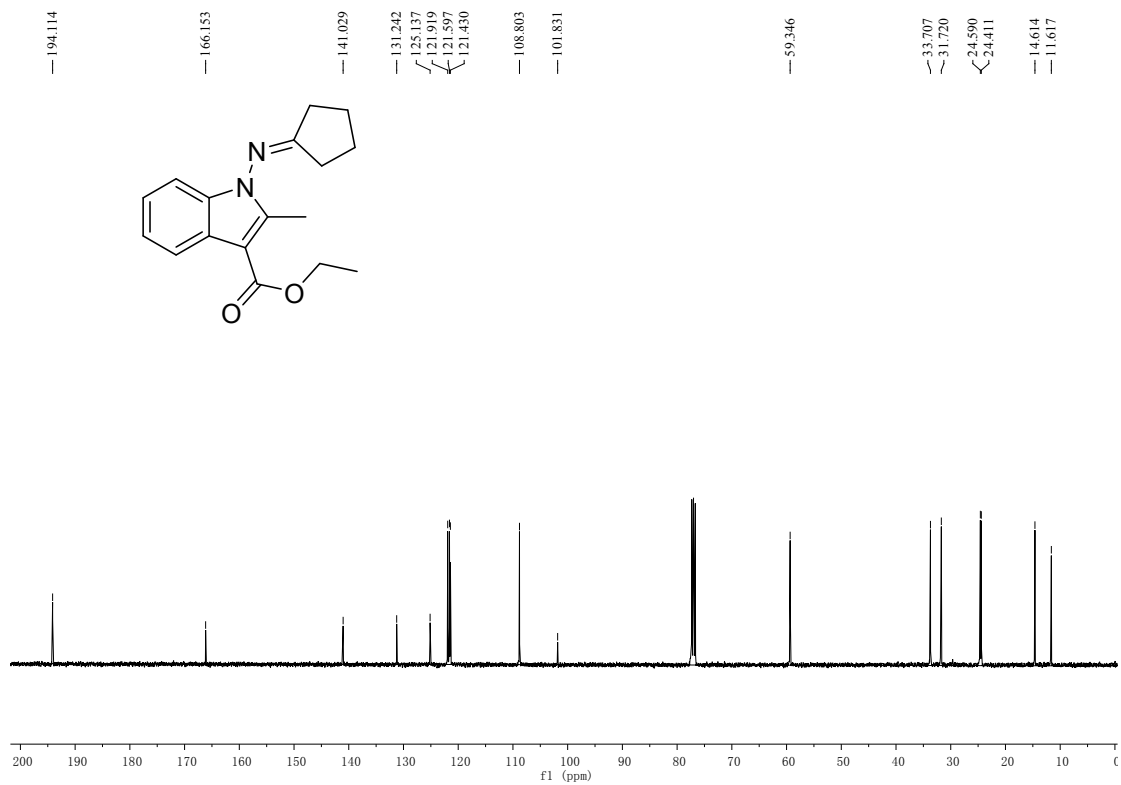

<sup>1</sup>H, <sup>13</sup>C spectra of 4zb

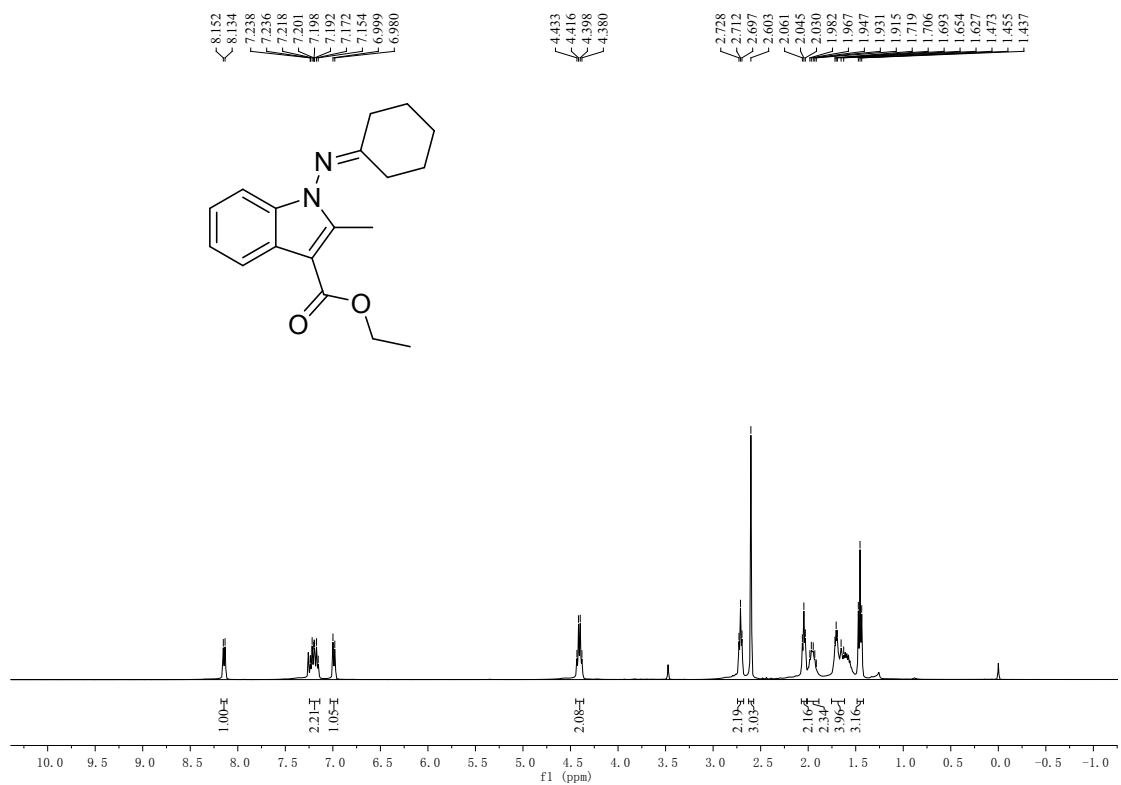

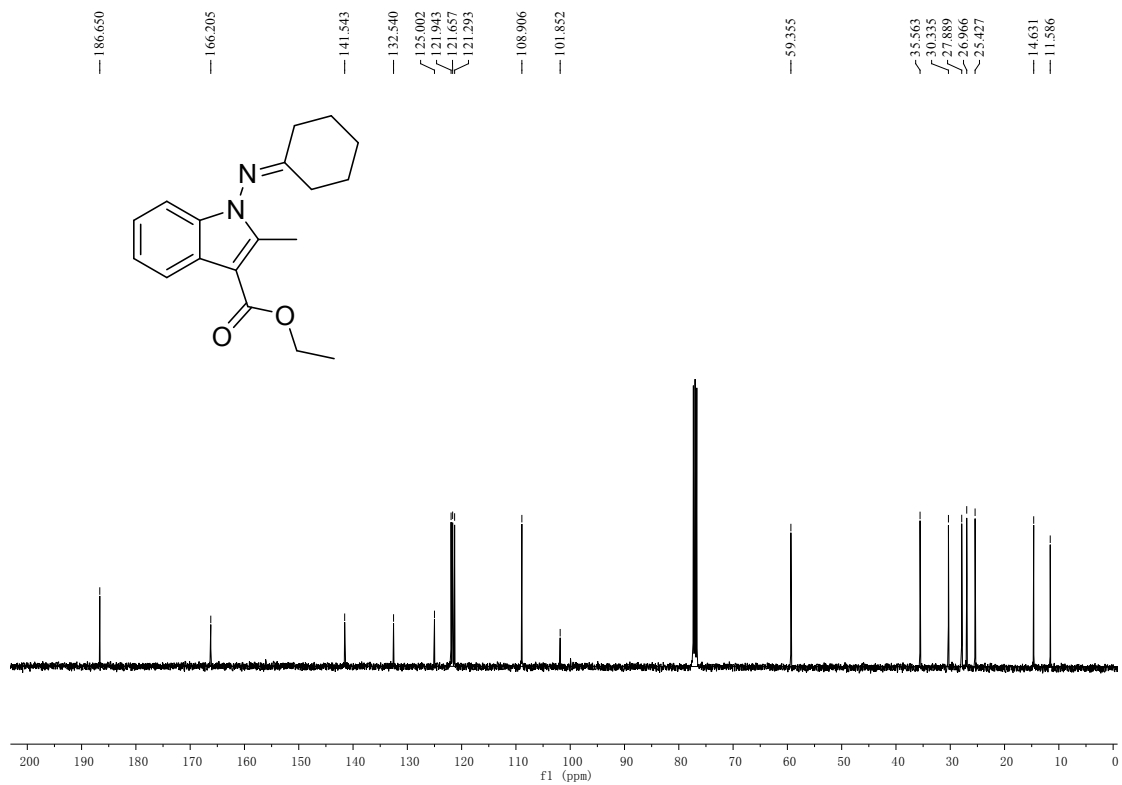

**<sup>1</sup>H, <sup>13</sup>C spectra of 5a**

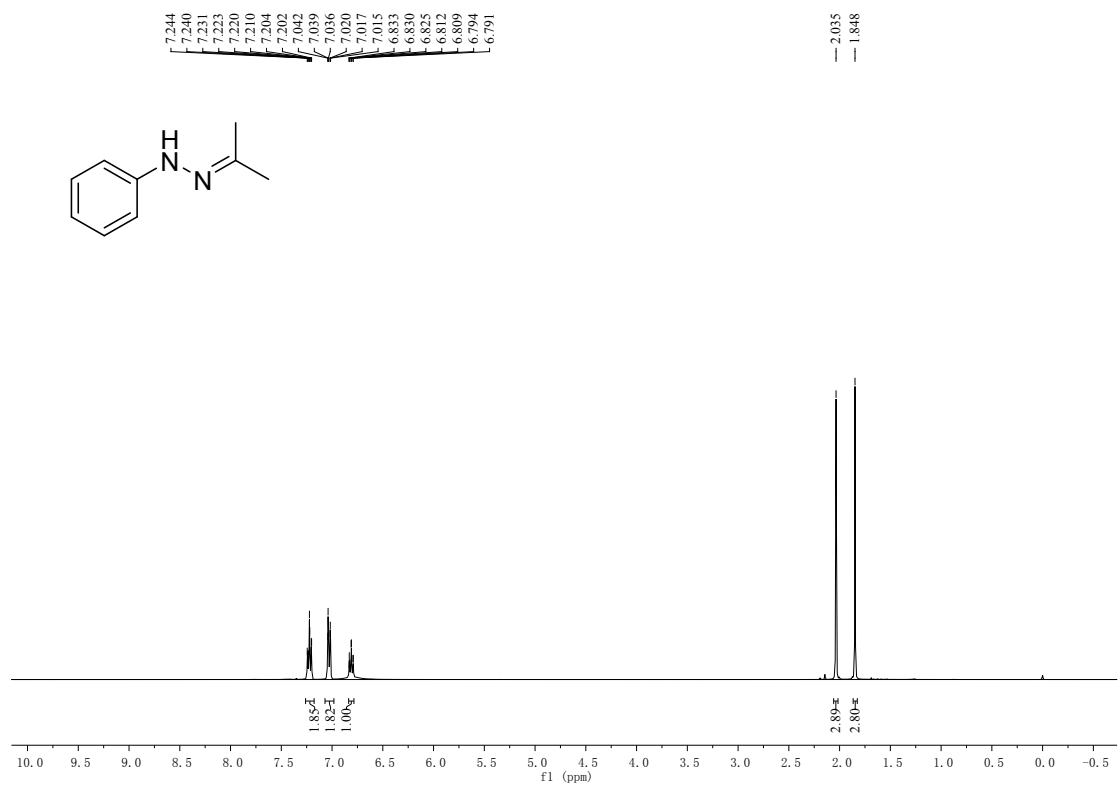

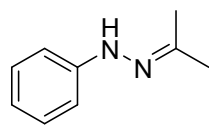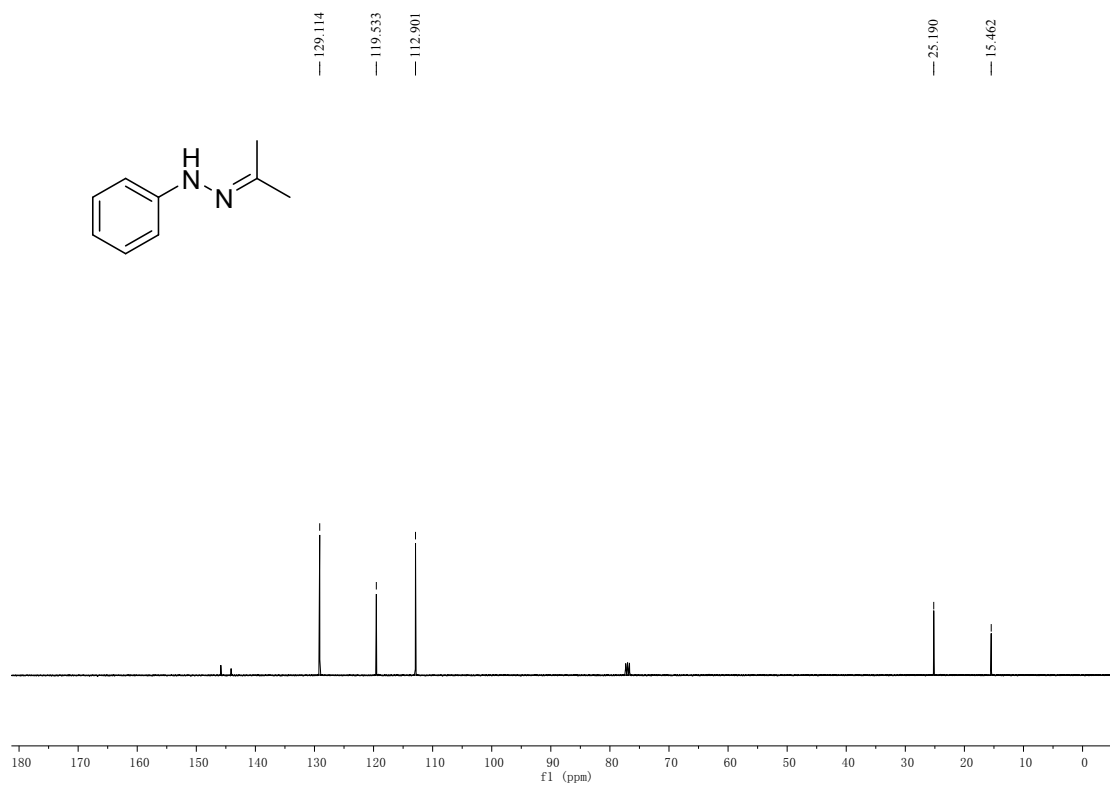

Supplement: c7qo00541e1.pdf [file c7qo00541e1.pdf]
